# Supplementary material
Source: Research Square preprint supplement (doi:10.21203/rs.3.rs-9308286/v1)
Supplement: Supplementary file 1 [file 76b8c10a8989894591e4bce5.pdf]

**Table S1 List of software used for the analysis**

---

| Name                                 | version | URL                                                                                                                                                             |
|--------------------------------------|---------|-----------------------------------------------------------------------------------------------------------------------------------------------------------------|
| FastQC                               | 0.12.1  | <a href="https://www.bioinformatics.babraham.ac.uk/projects/fastqc/">https://www.bioinformatics.babraham.ac.uk/projects/fastqc/</a>                             |
| MultiQC                              | 1.22.3  | <a href="https://multiqc.info/">https://multiqc.info/</a>                                                                                                       |
| Trimmomatic                          | 0.39    | <a href="http://www.usadellab.org/cms/?page=trimmomatic">http://www.usadellab.org/cms/?page=trimmomatic</a>                                                     |
| PRINSEQ-lite                         | 0.20.4  | <a href="http://prinseq.sourceforge.net/">http://prinseq.sourceforge.net/</a>                                                                                   |
| STAR                                 | 2.7.11b | <a href="https://github.com/alexdobin/STAR">https://github.com/alexdobin/STAR</a>                                                                               |
| The Subread<br>package/featureCounts | 2.0.6   | <a href="http://subread.sourceforge.net/">http://subread.sourceforge.net/</a>                                                                                   |
| R                                    | 4.3.3   | <a href="https://cran.r-project.org/">https://cran.r-project.org/</a>                                                                                           |
| edgeR                                | 4.2.0   | <a href="https://bioconductor.org/packages/release/bioc/html/edgeR.html">https://bioconductor.org/packages/release/bioc/html/edgeR.html</a>                     |
| gplots                               | 3.1.3.1 | <a href="https://cran.r-project.org/web/packages/gplots/index.html">https://cran.r-project.org/web/packages/gplots/index.html</a>                               |
| EnhancedVolcano                      | 1.22.0  | <a href="https://bioconductor.org/packages/release/bioc/html/EnhancedVolcano.html">https://bioconductor.org/packages/release/bioc/html/EnhancedVolcano.html</a> |
| ggfortify                            | 0.4.17  | <a href="https://cran.r-project.org/web/packages/ggfortify/index.html">https://cran.r-project.org/web/packages/ggfortify/index.html</a>                         |
| amap                                 | 0.8.19  | <a href="https://cran.r-project.org/web/packages/amap/index.html">https://cran.r-project.org/web/packages/amap/index.html</a>                                   |
| topGO                                | 2.56.0  | <a href="https://bioconductor.org/packages/release/bioc/html/topGO.html">https://bioconductor.org/packages/release/bioc/html/topGO.html</a>                     |
| rtracklayer                          | 1.64.0  | <a href="https://bioconductor.org/packages/devel/bioc/html/rtracklayer.html">https://bioconductor.org/packages/devel/bioc/html/rtracklayer.html</a>             |
| GenomicRanges                        | 1.56.2  | <a href="https://bioconductor.org/packages/devel/bioc/html/GenomicRanges.html">https://bioconductor.org/packages/devel/bioc/html/GenomicRanges.html</a>         |

---

**Table S2 List of differentially expressed genes showing a false discovery rate (FDR) < 0.05****A total of 1,420 genes were identified.**

| Names         | gene | logFC  | logCPM | PValue    | FDR       | start   | end     | width | strand |
|---------------|------|--------|--------|-----------|-----------|---------|---------|-------|--------|
| CDN75_RS16405 | alsA | -2.521 | 6.359  | 3.875E-63 | 1.686E-59 | 3164095 | 3165627 | 1533  | -      |
| CDN75_RS17710 | fimA | 2.193  | 6.612  | 3.412E-53 | 7.422E-50 | 3399313 | 3399861 | 549   | +      |
| CDN75_RS07205 | evgS | 1.356  | 7.987  | 5.744E-45 | 8.331E-42 | 1343319 | 1346912 | 3594  | +      |
| CDN75_RS16410 | alsB | -2.620 | 6.924  | 6.886E-44 | 7.023E-41 | 3165754 | 3166689 | 936   | -      |
| CDN75_RS16400 | alsC | -1.958 | 5.669  | 8.071E-44 | 7.023E-41 | 3163136 | 3164116 | 981   | -      |
| CDN75_RS16415 | alsR | -1.945 | 7.781  | 3.430E-41 | 2.487E-38 | 3166748 | 3167638 | 891   | -      |
| CDN75_RS21985 | rhIE | 1.251  | 7.452  | 1.113E-35 | 6.918E-33 | 4222492 | 4223856 | 1365  | +      |
| CDN75_RS13505 | cspE | 1.058  | 12.829 | 1.802E-34 | 9.799E-32 | 2573472 | 2573684 | 213   | +      |
| CDN75_RS14590 | rbsA | -1.629 | 9.413  | 2.834E-34 | 1.370E-31 | 2788539 | 2790044 | 1506  | +      |
| CDN75_RS00180 | bluF | 2.060  | 7.771  | 2.951E-33 | 1.284E-30 | 22552   | 23763   | 1212  | -      |
| CDN75_RS15085 | fadB | -1.221 | 8.104  | 1.229E-32 | 4.861E-30 | 2883541 | 2885730 | 2190  | -      |
| CDN75_RS16235 | yjcB | 1.217  | 6.294  | 7.968E-32 | 2.889E-29 | 3129519 | 3129800 | 282   | -      |
| CDN75_RS18580 | leuB | 1.842  | 7.775  | 4.529E-29 | 1.516E-26 | 3578715 | 3579806 | 1092  | -      |
| CDN75_RS08785 | proW | 1.092  | 9.950  | 9.856E-28 | 3.063E-25 | 1658162 | 1659226 | 1065  | +      |
| CDN75_RS08290 | grcA | 1.494  | 6.408  | 1.712E-27 | 4.967E-25 | 1568220 | 1568603 | 384   | -      |
| CDN75_RS00575 | narG | 1.413  | 6.474  | 9.674E-27 | 2.631E-24 | 88151   | 91894   | 3744  | +      |
| CDN75_RS16710 | groS | -1.110 | 7.898  | 2.478E-26 | 6.342E-24 | 3225334 | 3225627 | 294   | +      |
| CDN75_RS06525 | glpA | -1.200 | 7.609  | 8.302E-26 | 2.007E-23 | 1211592 | 1213220 | 1629  | +      |
| CDN75_RS13785 | lldP | -1.362 | 11.901 | 2.715E-25 | 6.217E-23 | 2630822 | 2632477 | 1656  | +      |
| CDN75_RS18845 | gcd  | 0.990  | 8.716  | 5.112E-25 | 1.112E-22 | 3636683 | 3639073 | 2391  | -      |
| CDN75_RS05860 | btsS | -1.159 | 5.776  | 2.802E-24 | 5.806E-22 | 1072017 | 1073702 | 1686  | -      |
| CDN75_RS13330 | dctA | -1.116 | 7.582  | 3.277E-24 | 6.480E-22 | 2535584 | 2536870 | 1287  | -      |
| CDN75_RS16530 | proP | 0.897  | 10.888 | 9.235E-24 | 1.747E-21 | 3185149 | 3186651 | 1503  | +      |
| CDN75_RS14145 | uhpT | -1.220 | 6.319  | 1.062E-23 | 1.925E-21 | 2700537 | 2701928 | 1392  | -      |
| CDN75_RS18575 | leuC | 1.743  | 7.743  | 1.587E-23 | 2.762E-21 | 3577312 | 3578712 | 1401  | -      |
| CDN75_RS00970 | lacZ | -2.762 | 8.114  | 5.710E-23 | 9.556E-21 | 150814  | 153795  | 2982  | -      |
| CDN75_RS08330 | yfiM | 1.009  | 7.075  | 1.067E-22 | 1.720E-20 | 1576282 | 1576605 | 324   | +      |
| CDN75_RS20215 | tomB | 1.048  | 6.431  | 1.884E-22 | 2.928E-20 | 3882118 | 3882492 | 375   | -      |
| CDN75_RS08685 | glaH | -1.242 | 5.570  | 4.293E-22 | 6.441E-20 | 1641137 | 1642114 | 978   | +      |
| CDN75_RS16715 | groL | -1.134 | 11.251 | 9.171E-22 | 1.330E-19 | 3225671 | 3227317 | 1647  | +      |
| CDN75_RS18355 | carA | -0.859 | 8.417  | 3.195E-21 | 4.485E-19 | 3527501 | 3528649 | 1149  | +      |
| CDN75_RS18270 | dnaK | -0.993 | 11.587 | 4.513E-21 | 6.137E-19 | 3510013 | 3511929 | 1917  | +      |
| CDN75_RS18790 | aceE | 0.824  | 12.501 | 9.987E-21 | 1.317E-18 | 3620865 | 3623528 | 2664  | +      |
| CDN75_RS17715 | fimI | 1.679  | 4.108  | 1.468E-20 | 1.865E-18 | 3399926 | 3400465 | 540   | +      |
| CDN75_RS12775 | yzgL | -1.062 | 5.843  | 1.501E-20 | 1.865E-18 | 2417210 | 2417431 | 222   | -      |
| CDN75_RS18530 | araC | -0.987 | 6.124  | 3.698E-20 | 4.470E-18 | 3568235 | 3569113 | 879   | +      |
| CDN75_RS15440 | cpxP | 1.119  | 8.937  | 4.184E-20 | 4.920E-18 | 2960579 | 2961079 | 501   | +      |
| CDN75_RS05700 | gatY | -0.928 | 10.571 | 5.007E-20 | 5.733E-18 | 1035408 | 1036262 | 855   | -      |
| CDN75_RS08790 | proX | 0.967  | 9.919  | 1.273E-19 | 1.420E-17 | 1659284 | 1660276 | 993   | +      |
| CDN75_RS19375 | fadE | -0.928 | 7.417  | 1.408E-19 | 1.532E-17 | 3738706 | 3741150 | 2445  | -      |
| CDN75_RS18585 | leuA | 1.235  | 8.747  | 1.982E-19 | 2.103E-17 | 3579806 | 3581377 | 1572  | -      |
| CDN75_RS05030 | shiA | 0.899  | 7.046  | 2.076E-19 | 2.150E-17 | 911506  | 912822  | 1317  | +      |
| CDN75_RS08780 | proV | 0.887  | 10.231 | 2.126E-19 | 2.151E-17 | 1656967 | 1658169 | 1203  | +      |
| CDN75_RS01300 | puuA | 1.473  | 7.556  | 3.822E-19 | 3.780E-17 | 215733  | 217151  | 1419  | -      |
| CDN75_RS20285 | htpG | -0.916 | 9.892  | 5.279E-19 | 5.104E-17 | 3896904 | 3898778 | 1875  | +      |
| CDN75_RS09995 | serA | 0.788  | 9.852  | 9.126E-19 | 8.632E-17 | 1909266 | 1910498 | 1233  | -      |
| CDN75_RS16395 | alsE | -1.994 | 5.522  | 2.560E-18 | 2.370E-16 | 3162430 | 3163125 | 696   | -      |
| CDN75_RS20210 | hha  | 0.992  | 6.780  | 2.741E-18 | 2.484E-16 | 3881874 | 3882092 | 219   | -      |
| CDN75_RS16390 | alsK | -1.516 | 6.147  | 3.375E-18 | 2.997E-16 | 3161517 | 3162446 | 930   | -      |
| CDN75_RS20870 | fepC | 1.205  | 5.334  | 3.566E-18 | 3.103E-16 | 4011004 | 4011819 | 816   | -      |
| CDN75_RS11615 | gltB | 0.744  | 11.893 | 5.006E-18 | 4.271E-16 | 2208147 | 2212607 | 4461  | +      |
| CDN75_RS12770 | glpD | -0.893 | 10.638 | 5.233E-18 | 4.378E-16 | 2415436 | 2416941 | 1506  | +      |
| CDN75_RS03110 | add  | 0.815  | 7.783  | 6.951E-18 | 5.707E-16 | 559673  | 560674  | 1002  | +      |
| CDN75_RS03870 | ynjI | 1.262  | 4.753  | 1.948E-17 | 1.570E-15 | 701271  | 702311  | 1041  | -      |
| CDN75_RS08400 | pheA | 0.802  | 11.238 | 2.114E-17 | 1.672E-15 | 1589899 | 1591059 | 1161  | +      |
| CDN75_RS14390 | tnaB | -1.095 | 8.889  | 2.225E-17 | 1.729E-15 | 2744997 | 2746244 | 1248  | +      |

|               |       |        |        |           |           |         |         |        |
|---------------|-------|--------|--------|-----------|-----------|---------|---------|--------|
| CDN75_RS03865 | gdhA  | 0.835  | 8.134  | 3.133E-17 | 2.392E-15 | 699811  | 701154  | 1344 + |
| CDN75_RS00965 | lacY  | -2.370 | 5.629  | 3.370E-17 | 2.515E-15 | 149509  | 150762  | 1254 - |
| CDN75_RS12735 | malT  | -0.856 | 9.220  | 3.410E-17 | 2.515E-15 | 2406507 | 2409212 | 2706 + |
| CDN75_RS16425 | rpiB  | -1.486 | 4.324  | 4.819E-17 | 3.494E-15 | 3167997 | 3168446 | 450 +  |
| CDN75_RS11345 | deaD  | 0.746  | 11.482 | 7.074E-17 | 5.046E-15 | 2159393 | 2161282 | 1890 - |
| CDN75_RS07250 | lpnP  | 0.866  | 7.862  | 2.241E-16 | 1.573E-14 | 1354590 | 1355510 | 921 +  |
| CDN75_RS08690 | lhgO  | -1.037 | 5.941  | 2.759E-16 | 1.906E-14 | 1642134 | 1643402 | 1269 + |
| CDN75_RS05855 | btsR  | -1.045 | 5.584  | 2.825E-16 | 1.921E-14 | 1071301 | 1072020 | 720 -  |
| CDN75_RS15080 | fadA  | -0.874 | 7.360  | 3.526E-16 | 2.360E-14 | 2882368 | 2883531 | 1164 - |
| CDN75_RS00490 | prmC  | 0.784  | 6.613  | 5.797E-16 | 3.822E-14 | 74381   | 75214   | 834 +  |
| CDN75_RS13500 | yiaG  | 1.050  | 5.677  | 5.933E-16 | 3.853E-14 | 2572901 | 2573191 | 291 +  |
| CDN75_RS05695 | gatZ  | -0.848 | 11.020 | 1.600E-15 | 1.024E-13 | 1034117 | 1035379 | 1263 - |
| CDN75_RS15150 | srkA  | 0.734  | 8.004  | 2.048E-15 | 1.292E-13 | 2897174 | 2898160 | 987 +  |
| CDN75_RS21910 | moaB  | -0.948 | 6.145  | 2.369E-15 | 1.473E-13 | 4209675 | 4210187 | 513 +  |
| CDN75_RS05010 | mtfA  | -0.912 | 6.372  | 2.507E-15 | 1.536E-13 | 901514  | 902311  | 798 +  |
| CDN75_RS02750 | cspF  | 1.431  | 4.375  | 2.615E-15 | 1.580E-13 | 499295  | 499507  | 213 +  |
| CDN75_RS00355 | cvrA  | 0.844  | 7.084  | 6.932E-15 | 4.130E-13 | 48623   | 50359   | 1737 - |
| CDN75_RS02745 | cspB  | 0.808  | 9.535  | 7.023E-15 | 4.130E-13 | 498779  | 498994  | 216 -  |
| CDN75_RS07325 | nupC  | -0.814 | 8.326  | 9.797E-15 | 5.683E-13 | 1371987 | 1373189 | 1203 + |
| CDN75_RS05275 | hisG  | 0.770  | 6.959  | 1.012E-14 | 5.795E-13 | 948055  | 948954  | 900 +  |
| CDN75_RS24020 | gap   | 0.680  | 8.507  | 1.156E-14 | 6.532E-13 | 347155  | 348155  | 1001 - |
| CDN75_RS08260 | rpoE  | 0.747  | 8.340  | 1.291E-14 | 7.201E-13 | 1561591 | 1562166 | 576 -  |
| CDN75_RS17745 | gntP  | -0.980 | 5.284  | 1.453E-14 | 8.002E-13 | 3406151 | 3407494 | 1344 - |
| CDN75_RS18795 | aceF  | 0.726  | 11.633 | 2.028E-14 | 1.103E-12 | 3623543 | 3625435 | 1893 + |
| CDN75_RS22000 | dinG  | 0.834  | 7.324  | 3.167E-14 | 1.701E-12 | 4224690 | 4226840 | 2151 + |
| CDN75_RS16695 | aspA  | -0.865 | 9.824  | 3.231E-14 | 1.714E-12 | 3221537 | 3222973 | 1437 - |
| CDN75_RS24780 | NA    | 2.332  | 2.381  | 3.372E-14 | 1.768E-12 | 528441  | 528560  | 120 -  |
| CDN75_RS14595 | rbsC  | -0.888 | 9.576  | 3.419E-14 | 1.771E-12 | 2790049 | 2791014 | 966 +  |
| CDN75_RS22590 | aroA  | 0.736  | 7.531  | 5.522E-14 | 2.827E-12 | 4351770 | 4353053 | 1284 + |
| CDN75_RS18570 | leuD  | 1.269  | 6.199  | 5.669E-14 | 2.868E-12 | 3576696 | 3577301 | 606 -  |
| CDN75_RS04315 | copD  | 0.774  | 7.974  | 7.063E-14 | 3.532E-12 | 782358  | 783230  | 873 -  |
| CDN75_RS13790 | lldR  | -1.018 | 9.899  | 7.611E-14 | 3.763E-12 | 2632477 | 2633253 | 777 +  |
| CDN75_RS17250 | treB  | -0.937 | 10.426 | 7.851E-14 | 3.838E-12 | 3320181 | 3321602 | 1422 - |
| CDN75_RS14120 | nepI  | 0.872  | 6.861  | 9.411E-14 | 4.550E-12 | 2695310 | 2696500 | 1191 - |
| CDN75_RS24015 | ynaM  | 1.443  | 6.419  | 1.092E-13 | 5.220E-12 | 291735  | 291848  | 114 -  |
| CDN75_RS21915 | moaC  | -0.845 | 5.436  | 1.196E-13 | 5.658E-12 | 4210190 | 4210675 | 486 +  |
| CDN75_RS01950 | aldA  | -0.851 | 8.987  | 1.236E-13 | 5.785E-12 | 345674  | 347113  | 1440 + |
| CDN75_RS20875 | fepG  | 0.791  | 5.866  | 1.615E-13 | 7.478E-12 | 4011816 | 4012808 | 993 -  |
| CDN75_RS05955 | yohK  | 1.014  | 4.897  | 1.753E-13 | 8.029E-12 | 1090077 | 1090772 | 696 +  |
| CDN75_RS21580 | sdhC  | -0.681 | 10.294 | 1.847E-13 | 8.369E-12 | 4146782 | 4147186 | 405 +  |
| CDN75_RS08255 | rseA  | 0.808  | 9.074  | 2.280E-13 | 1.022E-11 | 1560908 | 1561558 | 651 -  |
| CDN75_RS17240 | nrdD  | -0.822 | 7.878  | 2.729E-13 | 1.211E-11 | 3315944 | 3318082 | 2139 - |
| CDN75_RS11360 | pnp   | 0.698  | 11.860 | 2.830E-13 | 1.244E-11 | 2162455 | 2164590 | 2136 - |
| CDN75_RS06530 | glpB  | -1.107 | 7.525  | 3.101E-13 | 1.349E-11 | 1213210 | 1214469 | 1260 + |
| CDN75_RS10145 | metK  | -0.684 | 8.872  | 3.564E-13 | 1.535E-11 | 1938794 | 1939948 | 1155 + |
| CDN75_RS24045 | NA    | 1.373  | 4.279  | 3.846E-13 | 1.640E-11 | 499562  | 499651  | 90 +   |
| CDN75_RS19830 | aroL  | 0.790  | 7.862  | 4.096E-13 | 1.730E-11 | 3808189 | 3808713 | 525 +  |
| CDN75_RS17755 | uxuA  | -0.776 | 6.549  | 5.160E-13 | 2.159E-11 | 3407834 | 3409018 | 1185 + |
| CDN75_RS13795 | lldD  | -0.893 | 11.085 | 5.300E-13 | 2.196E-11 | 2633250 | 2634440 | 1191 + |
| CDN75_RS17880 | yjiT  | -0.759 | 6.567  | 5.775E-13 | 2.370E-11 | 3428612 | 3430120 | 1509 + |
| CDN75_RS06970 | epmC  | 0.682  | 6.522  | 9.600E-13 | 3.904E-11 | 1303148 | 1303696 | 549 -  |
| CDN75_RS17245 | treC  | -1.070 | 9.837  | 9.833E-13 | 3.929E-11 | 3318476 | 3320131 | 1656 - |
| CDN75_RS01085 | trpCF | 0.716  | 6.615  | 9.843E-13 | 3.929E-11 | 174670  | 176031  | 1362 - |
| CDN75_RS21585 | sdhD  | -0.690 | 9.625  | 1.028E-12 | 4.066E-11 | 4147180 | 4147527 | 348 +  |
| CDN75_RS14585 | rbsD  | -0.774 | 7.047  | 1.094E-12 | 4.289E-11 | 2788112 | 2788531 | 420 +  |
| CDN75_RS08795 | NA    | 0.880  | 5.462  | 1.539E-12 | 5.977E-11 | 1660468 | 1661645 | 1178 + |
| CDN75_RS13200 | slp   | -1.038 | 5.159  | 1.580E-12 | 6.084E-11 | 2507384 | 2507950 | 567 +  |
| CDN75_RS12535 | yhfZ  | -1.062 | 4.213  | 1.859E-12 | 7.095E-11 | 2364861 | 2365766 | 906 -  |
| CDN75_RS23420 | trhO  | -0.790 | 6.891  | 1.953E-12 | 7.389E-11 | 4511144 | 4512196 | 1053 + |

|               |      |        |        |           |           |         |         |        |
|---------------|------|--------|--------|-----------|-----------|---------|---------|--------|
| CDN75_RS21590 | sdhA | -0.672 | 12.131 | 2.079E-12 | 7.797E-11 | 4147527 | 4149293 | 1767 + |
| CDN75_RS21070 | cspE | 0.795  | 8.257  | 2.222E-12 | 8.262E-11 | 4048912 | 4049121 | 210 +  |
| CDN75_RS05230 | tsuA | -1.119 | 5.733  | 2.321E-12 | 8.560E-11 | 942330  | 943388  | 1059 - |
| CDN75_RS15015 | udp  | -0.738 | 8.487  | 2.343E-12 | 8.566E-11 | 2871190 | 2871951 | 762 +  |
| CDN75_RS00960 | lacA | -1.932 | 4.708  | 3.675E-12 | 1.332E-10 | 148832  | 149443  | 612 -  |
| CDN75_RS11620 | gltD | 0.645  | 9.758  | 3.765E-12 | 1.354E-10 | 2212620 | 2214038 | 1419 + |
| CDN75_RS23715 | ldtC | 0.946  | 5.084  | 4.067E-12 | 1.450E-10 | 4563749 | 4564711 | 963 -  |
| CDN75_RS05280 | hisD | 0.674  | 7.705  | 4.232E-12 | 1.488E-10 | 948960  | 950264  | 1305 + |
| CDN75_RS01075 | trpA | 0.775  | 6.189  | 4.241E-12 | 1.488E-10 | 172659  | 173465  | 807 -  |
| CDN75_RS01080 | trpB | 0.859  | 6.782  | 4.824E-12 | 1.679E-10 | 173465  | 174658  | 1194 - |
| CDN75_RS02715 | cspI | 1.732  | 6.372  | 4.881E-12 | 1.685E-10 | 495895  | 496107  | 213 -  |
| CDN75_RS14605 | rbsK | -0.775 | 9.571  | 5.125E-12 | 1.756E-10 | 2792055 | 2792984 | 930 +  |
| CDN75_RS17965 | opgB | -0.708 | 7.723  | 5.187E-12 | 1.763E-10 | 3453348 | 3455639 | 2292 - |
| CDN75_RS18735 | guaC | -0.901 | 8.420  | 6.210E-12 | 2.094E-10 | 3611292 | 3612335 | 1044 + |
| CDN75_RS00580 | narH | 1.418  | 5.091  | 6.379E-12 | 2.135E-10 | 91891   | 93429   | 1539 + |
| CDN75_RS09380 | sdaB | -0.743 | 9.308  | 6.471E-12 | 2.149E-10 | 1781665 | 1783032 | 1368 + |
| CDN75_RS10175 | yqgE | 0.615  | 7.194  | 7.469E-12 | 2.446E-10 | 1945025 | 1945588 | 564 +  |
| CDN75_RS16750 | sugE | 0.841  | 6.326  | 7.476E-12 | 2.446E-10 | 3231521 | 3231838 | 318 +  |
| CDN75_RS16910 | rnr  | 0.710  | 9.606  | 7.783E-12 | 2.527E-10 | 3261300 | 3263741 | 2442 + |
| CDN75_RS23025 | cspG | 1.289  | 10.608 | 8.524E-12 | 2.747E-10 | 4444419 | 4444631 | 213 +  |
| CDN75_RS23030 | ymcF | 1.365  | 5.784  | 8.599E-12 | 2.751E-10 | 4444642 | 4444830 | 189 +  |
| CDN75_RS08245 | rseC | 0.666  | 7.255  | 8.685E-12 | 2.758E-10 | 1559476 | 1559955 | 480 -  |
| CDN75_RS17685 | fimB | 0.672  | 6.613  | 9.628E-12 | 3.036E-10 | 3396379 | 3396981 | 603 +  |
| CDN75_RS06975 | yfcA | 0.694  | 6.746  | 9.820E-12 | 3.074E-10 | 1303696 | 1304505 | 810 -  |
| CDN75_RS05690 | gatA | -0.870 | 8.694  | 1.379E-11 | 4.286E-10 | 1033655 | 1034107 | 453 -  |
| CDN75_RS08025 | iscR | 0.682  | 8.738  | 1.439E-11 | 4.440E-10 | 1513797 | 1514285 | 489 -  |
| CDN75_RS04960 | hchA | -0.800 | 7.019  | 1.460E-11 | 4.472E-10 | 893698  | 894549  | 852 +  |
| CDN75_RS06055 | yieE | 0.720  | 6.826  | 1.512E-11 | 4.579E-10 | 1107795 | 1108676 | 882 -  |
| CDN75_RS01295 | puuP | 1.017  | 5.107  | 1.515E-11 | 4.579E-10 | 214045  | 215430  | 1386 - |
| CDN75_RS05285 | hisC | 0.649  | 7.184  | 1.561E-11 | 4.685E-10 | 950261  | 951331  | 1071 + |
| CDN75_RS22450 | infA | 0.602  | 7.916  | 1.701E-11 | 5.068E-10 | 4317845 | 4318063 | 219 -  |
| CDN75_RS04275 | msrC | 0.636  | 7.951  | 1.735E-11 | 5.121E-10 | 774270  | 774767  | 498 -  |
| CDN75_RS21505 | phrB | 0.730  | 6.066  | 1.742E-11 | 5.121E-10 | 4131127 | 4132545 | 1419 + |
| CDN75_RS04080 | dmlA | 1.481  | 5.272  | 1.897E-11 | 5.538E-10 | 739352  | 740437  | 1086 + |
| CDN75_RS13080 | rbbA | -0.714 | 8.227  | 1.931E-11 | 5.602E-10 | 2480226 | 2482961 | 2736 - |
| CDN75_RS23530 | flgE | 1.272  | 5.828  | 2.072E-11 | 5.970E-10 | 4526911 | 4528119 | 1209 + |
| CDN75_RS08935 | norR | -0.693 | 5.913  | 2.089E-11 | 5.979E-10 | 1682926 | 1684440 | 1515 - |
| CDN75_RS06405 | resC | 0.600  | 7.754  | 2.170E-11 | 6.170E-10 | 1175972 | 1178821 | 2850 - |
| CDN75_RS01475 | ynaI | -0.904 | 4.971  | 2.859E-11 | 7.999E-10 | 251134  | 252165  | 1032 - |
| CDN75_RS08425 | dgcN | 0.809  | 5.538  | 2.859E-11 | 7.999E-10 | 1594537 | 1595763 | 1227 + |
| CDN75_RS00485 | prfA | 0.586  | 7.403  | 2.868E-11 | 7.999E-10 | 73299   | 74381   | 1083 + |
| CDN75_RS14405 | yieE | 0.699  | 6.370  | 2.952E-11 | 8.182E-10 | 2748642 | 2749391 | 750 +  |
| CDN75_RS11355 | nlpI | 0.562  | 11.173 | 3.084E-11 | 8.493E-10 | 2161462 | 2162346 | 885 -  |
| CDN75_RS18275 | dnaJ | -0.714 | 8.422  | 3.516E-11 | 9.620E-10 | 3512018 | 3513148 | 1131 + |
| CDN75_RS14740 | gppA | 0.584  | 9.267  | 3.687E-11 | 1.003E-09 | 2817505 | 2818989 | 1485 - |
| CDN75_RS08420 | yfiR | 0.893  | 5.075  | 3.787E-11 | 1.023E-09 | 1594029 | 1594547 | 519 +  |
| CDN75_RS03300 | ydhP | 0.885  | 5.250  | 4.871E-11 | 1.308E-09 | 593561  | 594730  | 1170 - |
| CDN75_RS15420 | kdgT | -0.686 | 9.001  | 5.818E-11 | 1.546E-09 | 2956449 | 2957432 | 984 +  |
| CDN75_RS05685 | gatB | -0.852 | 7.373  | 5.826E-11 | 1.546E-09 | 1033379 | 1033624 | 246 -  |
| CDN75_RS23695 | ndh  | 0.675  | 7.597  | 6.239E-11 | 1.645E-09 | 4560422 | 4561726 | 1305 + |
| CDN75_RS23035 | ymcE | 2.032  | 3.072  | 6.416E-11 | 1.682E-09 | 4444805 | 4445035 | 231 +  |
| CDN75_RS19325 | rnhA | 0.696  | 5.567  | 8.609E-11 | 2.232E-09 | 3733382 | 3733849 | 468 -  |
| CDN75_RS11795 | tldD | 0.637  | 8.856  | 8.619E-11 | 2.232E-09 | 2244005 | 2245450 | 1446 - |
| CDN75_RS20745 | nfrA | -0.707 | 5.849  | 8.762E-11 | 2.256E-09 | 3979602 | 3982574 | 2973 - |
| CDN75_RS11575 | npr  | 0.711  | 5.809  | 9.176E-11 | 2.349E-09 | 2201388 | 2201660 | 273 +  |
| CDN75_RS19835 | yaiA | 0.693  | 6.119  | 9.341E-11 | 2.377E-09 | 3808763 | 3808954 | 192 +  |
| CDN75_RS05510 | yegH | 0.685  | 6.939  | 1.048E-10 | 2.651E-09 | 995763  | 997346  | 1584 + |
| CDN75_RS09375 | sdaC | -0.726 | 10.316 | 1.090E-10 | 2.741E-09 | 1780318 | 1781607 | 1290 + |
| CDN75_RS16430 | yjdP | -1.012 | 4.750  | 1.124E-10 | 2.812E-09 | 3168515 | 3168844 | 330 +  |

|               |      |        |        |           |           |         |         |        |
|---------------|------|--------|--------|-----------|-----------|---------|---------|--------|
| CDN75_RS16535 | pmrR | 1.358  | 4.132  | 1.407E-10 | 3.498E-09 | 3186763 | 3186852 | 90 +   |
| CDN75_RS01305 | puuD | 0.890  | 5.401  | 1.503E-10 | 3.714E-09 | 217363  | 218127  | 765 +  |
| CDN75_RS01730 | pinR | 1.896  | 4.415  | 1.597E-10 | 3.925E-09 | 290526  | 291116  | 591 -  |
| CDN75_RS04265 | prc  | 0.575  | 9.662  | 1.743E-10 | 4.262E-09 | 771407  | 773455  | 2049 - |
| CDN75_RS17110 | cpdB | -0.633 | 6.564  | 1.927E-10 | 4.683E-09 | 3290029 | 3291987 | 1959 - |
| CDN75_RS10460 | gpr  | -0.676 | 7.465  | 1.963E-10 | 4.746E-09 | 1999983 | 2001023 | 1041 + |
| CDN75_RS23535 | flgF | 1.124  | 4.951  | 2.035E-10 | 4.893E-09 | 4528139 | 4528894 | 756 +  |
| CDN75_RS04215 | yobF | 0.689  | 7.307  | 2.098E-10 | 5.015E-09 | 764888  | 765031  | 144 -  |
| CDN75_RS10990 | uxaC | -0.741 | 5.945  | 2.112E-10 | 5.022E-09 | 2096752 | 2098164 | 1413 - |
| CDN75_RS01735 | ydfK | 1.486  | 5.980  | 2.408E-10 | 5.695E-09 | 291433  | 291666  | 234 -  |
| CDN75_RS04775 | yedE | -0.668 | 7.920  | 2.508E-10 | 5.899E-09 | 866140  | 867345  | 1206 + |
| CDN75_RS21970 | ybhF | -0.650 | 7.470  | 2.599E-10 | 6.079E-09 | 4218865 | 4220601 | 1737 - |
| CDN75_RS24005 | NA   | 1.811  | 2.976  | 2.844E-10 | 6.616E-09 | 215420  | 215584  | 165 -  |
| CDN75_RS19305 | yafE | 0.718  | 5.454  | 2.969E-10 | 6.858E-09 | 3729800 | 3730396 | 597 +  |
| CDN75_RS08410 | aroF | 0.973  | 8.947  | 2.979E-10 | 6.858E-09 | 1592234 | 1593304 | 1071 - |
| CDN75_RS04825 | fliG | 1.184  | 4.606  | 3.241E-10 | 7.421E-09 | 872743  | 873738  | 996 +  |
| CDN75_RS08250 | rseB | 0.598  | 8.424  | 3.969E-10 | 9.041E-09 | 1559952 | 1560908 | 957 -  |
| CDN75_RS22915 | yccA | 0.613  | 8.959  | 4.238E-10 | 9.603E-09 | 4423717 | 4424376 | 660 -  |
| CDN75_RS04685 | uvrC | 0.566  | 8.252  | 4.439E-10 | 1.001E-08 | 850737  | 852569  | 1833 - |
| CDN75_RS01310 | puuR | 0.854  | 5.302  | 4.565E-10 | 1.024E-08 | 218154  | 218711  | 558 +  |
| CDN75_RS22340 | artI | -0.643 | 7.615  | 4.697E-10 | 1.048E-08 | 4293877 | 4294608 | 732 -  |
| CDN75_RS10670 | ribB | 0.585  | 7.818  | 5.333E-10 | 1.184E-08 | 2035899 | 2036552 | 654 -  |
| CDN75_RS03035 | rstA | -0.790 | 6.922  | 6.097E-10 | 1.347E-08 | 539599  | 540318  | 720 +  |
| CDN75_RS15645 | ppc  | 0.571  | 10.734 | 6.204E-10 | 1.362E-08 | 3005206 | 3007857 | 2652 - |
| CDN75_RS04310 | yebY | 0.672  | 5.874  | 6.229E-10 | 1.362E-08 | 782004  | 782345  | 342 -  |
| CDN75_RS16145 | lexA | 0.803  | 7.849  | 7.340E-10 | 1.597E-08 | 3111874 | 3112482 | 609 +  |
| CDN75_RS10650 | ygiC | 0.585  | 8.441  | 7.814E-10 | 1.691E-08 | 2032507 | 2033667 | 1161 + |
| CDN75_RS08320 | patZ | -0.648 | 7.684  | 8.999E-10 | 1.938E-08 | 1572107 | 1574767 | 2661 + |
| CDN75_RS10260 | nupG | -0.653 | 6.965  | 9.186E-10 | 1.969E-08 | 1957802 | 1959057 | 1256 + |
| CDN75_RS15285 | csqR | -0.659 | 6.019  | 9.488E-10 | 2.024E-08 | 2929428 | 2930213 | 786 +  |
| CDN75_RS03900 | sppA | 0.590  | 7.324  | 1.004E-09 | 2.131E-08 | 706277  | 708133  | 1857 + |
| CDN75_RS11010 | mzrA | 0.951  | 5.247  | 1.081E-09 | 2.284E-08 | 2101862 | 2102245 | 384 +  |
| CDN75_RS08405 | tyrA | 0.617  | 8.040  | 1.094E-09 | 2.299E-08 | 1591102 | 1592223 | 1122 - |
| CDN75_RS21595 | sdhB | -0.581 | 10.776 | 1.140E-09 | 2.384E-08 | 4149309 | 4150025 | 717 +  |
| CDN75_RS18360 | carB | -0.583 | 10.133 | 1.157E-09 | 2.410E-08 | 3528667 | 3531888 | 3222 + |
| CDN75_RS04360 | purT | -0.705 | 7.693  | 1.357E-09 | 2.813E-08 | 789520  | 790698  | 1179 + |
| CDN75_RS04345 | yebE | 0.781  | 5.356  | 1.443E-09 | 2.975E-08 | 787687  | 788346  | 660 -  |
| CDN75_RS06570 | yfaY | 0.623  | 7.318  | 1.452E-09 | 2.979E-08 | 1221376 | 1222578 | 1203 - |
| CDN75_RS00175 | bluR | 0.643  | 7.545  | 1.498E-09 | 3.049E-08 | 21616   | 22347   | 732 -  |
| CDN75_RS12005 | aroE | 0.615  | 6.411  | 1.500E-09 | 3.049E-08 | 2283442 | 2284260 | 819 -  |
| CDN75_RS15505 | glpF | -0.827 | 9.888  | 1.785E-09 | 3.613E-08 | 2972004 | 2972849 | 846 -  |
| CDN75_RS18165 | robA | 0.617  | 8.932  | 1.890E-09 | 3.808E-08 | 3490639 | 3491508 | 870 -  |
| CDN75_RS12530 | yhfY | -1.814 | 2.547  | 1.940E-09 | 3.890E-08 | 2364482 | 2364844 | 363 -  |
| CDN75_RS04855 | fliM | 1.053  | 4.869  | 2.066E-09 | 4.123E-08 | 877950  | 878954  | 1005 + |
| CDN75_RS00200 | yngC | -1.572 | 2.631  | 2.135E-09 | 4.241E-08 | 25036   | 25284   | 249 +  |
| CDN75_RS06010 | yeiB | 0.585  | 6.476  | 2.380E-09 | 4.707E-08 | 1100868 | 1102025 | 1158 - |
| CDN75_RS18520 | araB | -1.010 | 4.066  | 2.575E-09 | 5.071E-08 | 3566196 | 3567896 | 1701 - |
| CDN75_RS02665 | pinQ | 1.632  | 4.173  | 2.849E-09 | 5.584E-08 | 491062  | 491652  | 591 +  |
| CDN75_RS23655 | ptsG | -0.598 | 9.544  | 3.017E-09 | 5.887E-08 | 4552206 | 4553639 | 1434 + |
| CDN75_RS08560 | rnlB | 0.594  | 6.003  | 3.150E-09 | 6.119E-08 | 1619137 | 1619508 | 372 +  |
| CDN75_RS08695 | gabD | -0.660 | 6.597  | 3.363E-09 | 6.502E-08 | 1643425 | 1644873 | 1449 + |
| CDN75_RS22585 | serC | 0.548  | 9.466  | 3.378E-09 | 6.503E-08 | 4350611 | 4351699 | 1089 + |
| CDN75_RS15205 | glnL | 0.641  | 7.264  | 4.101E-09 | 7.860E-08 | 2910049 | 2911098 | 1050 - |
| CDN75_RS03575 | selO | 0.588  | 8.557  | 4.125E-09 | 7.872E-08 | 647248  | 648684  | 1437 - |
| CDN75_RS08365 | clpB | -0.570 | 10.217 | 4.365E-09 | 8.293E-08 | 1583754 | 1586327 | 2574 - |
| CDN75_RS19825 | yaiI | 0.662  | 6.339  | 4.510E-09 | 8.532E-08 | 3807548 | 3808006 | 459 +  |
| CDN75_RS16015 | yjbD | 0.828  | 5.005  | 4.575E-09 | 8.617E-08 | 3086118 | 3086390 | 273 -  |
| CDN75_RS21920 | moaD | -0.875 | 4.543  | 4.644E-09 | 8.710E-08 | 4210668 | 4210913 | 246 +  |
| CDN75_RS14610 | rbsR | -0.686 | 7.796  | 4.698E-09 | 8.772E-08 | 2792988 | 2793979 | 992 +  |

|               |       |        |        |           |           |         |         |        |
|---------------|-------|--------|--------|-----------|-----------|---------|---------|--------|
| CDN75_RS04675 | NA    | 0.837  | 5.082  | 5.037E-09 | 9.367E-08 | 849905  | 849980  | 76 -   |
| CDN75_RS08335 | kgtP  | 0.506  | 11.440 | 5.339E-09 | 9.885E-08 | 1576602 | 1577900 | 1299 - |
| CDN75_RS02460 | hipA  | -0.874 | 4.761  | 6.317E-09 | 1.165E-07 | 448296  | 449618  | 1323 - |
| CDN75_RS19850 | ppnP  | 0.619  | 7.003  | 6.346E-09 | 1.165E-07 | 3809961 | 3810245 | 285 +  |
| CDN75_RS04100 | rnd   | 0.625  | 6.578  | 6.891E-09 | 1.260E-07 | 744304  | 745419  | 1116 - |
| CDN75_RS18090 | deoA  | -0.574 | 8.083  | 7.296E-09 | 1.328E-07 | 3474427 | 3475749 | 1323 + |
| CDN75_RS11445 | yhbY  | 0.528  | 8.152  | 7.573E-09 | 1.373E-07 | 2181212 | 2181505 | 294 +  |
| CDN75_RS06535 | glpC  | -0.948 | 7.330  | 7.874E-09 | 1.422E-07 | 1214466 | 1215656 | 1191 + |
| CDN75_RS04210 | cspE  | 0.610  | 9.741  | 7.951E-09 | 1.425E-07 | 764666  | 764875  | 210 -  |
| CDN75_RS14700 | ilvE  | 0.562  | 6.958  | 7.960E-09 | 1.425E-07 | 2807244 | 2808173 | 930 +  |
| CDN75_RS22500 | ftsK  | 0.492  | 9.769  | 8.444E-09 | 1.506E-07 | 4326182 | 4330171 | 3990 + |
| CDN75_RS02605 | ydeE  | 0.744  | 5.854  | 8.640E-09 | 1.534E-07 | 478772  | 479959  | 1188 + |
| CDN75_RS20155 | mdlB  | 0.591  | 6.524  | 8.991E-09 | 1.590E-07 | 3872420 | 3874201 | 1782 + |
| CDN75_RS04585 | flhD  | -1.087 | 3.775  | 9.428E-09 | 1.661E-07 | 836486  | 836836  | 351 -  |
| CDN75_RS00340 | dadA  | -0.600 | 9.845  | 9.736E-09 | 1.708E-07 | 45859   | 47157   | 1299 + |
| CDN75_RS00495 | sirB2 | 0.787  | 4.647  | 9.917E-09 | 1.733E-07 | 75211   | 75603   | 393 +  |
| CDN75_RS15275 | yihU  | -1.181 | 3.375  | 9.992E-09 | 1.739E-07 | 2927434 | 2928330 | 897 -  |
| CDN75_RS11100 | tdcE  | 1.211  | 5.347  | 1.021E-08 | 1.771E-07 | 2113547 | 2115841 | 2295 - |
| CDN75_RS19845 | aroM  | 0.660  | 5.761  | 1.083E-08 | 1.871E-07 | 3809212 | 3809889 | 678 +  |
| CDN75_RS09975 | zapA  | 0.531  | 7.717  | 1.102E-08 | 1.896E-07 | 1907700 | 1908029 | 330 +  |
| CDN75_RS23445 | bssS  | 1.057  | 5.356  | 1.107E-08 | 1.896E-07 | 4515038 | 4515292 | 255 -  |
| CDN75_RS15925 | purH  | -0.733 | 10.826 | 1.131E-08 | 1.929E-07 | 3060702 | 3062291 | 1590 - |
| CDN75_RS08870 | csrA  | 0.534  | 8.389  | 1.273E-08 | 2.164E-07 | 1671112 | 1671297 | 186 -  |
| CDN75_RS11105 | tdcD  | 1.187  | 4.092  | 1.340E-08 | 2.269E-07 | 2115875 | 2117083 | 1209 - |
| CDN75_RS21435 | kdpD  | -0.581 | 6.704  | 1.385E-08 | 2.336E-07 | 4113350 | 4116034 | 2685 - |
| CDN75_RS02590 | marA  | -0.718 | 5.744  | 1.724E-08 | 2.896E-07 | 477014  | 477397  | 384 +  |
| CDN75_RS13425 | dppB  | 0.758  | 5.053  | 1.804E-08 | 3.020E-07 | 2558194 | 2559213 | 1020 - |
| CDN75_RS15010 | ysgA  | 0.544  | 6.575  | 1.988E-08 | 3.314E-07 | 2870113 | 2870928 | 816 -  |
| CDN75_RS13755 | mtlA  | -0.562 | 6.706  | 2.048E-08 | 3.401E-07 | 2625704 | 2627617 | 1914 + |
| CDN75_RS13685 | aldB  | -0.791 | 4.648  | 2.087E-08 | 3.452E-07 | 2608396 | 2609934 | 1539 - |
| CDN75_RS16570 | melR  | -0.851 | 4.602  | 2.107E-08 | 3.472E-07 | 3195367 | 3196275 | 909 -  |
| CDN75_RS02600 | eamA  | 0.691  | 6.002  | 2.121E-08 | 3.482E-07 | 477678  | 478577  | 900 -  |
| CDN75_RS08045 | csiE  | -0.605 | 5.801  | 2.142E-08 | 3.504E-07 | 1517589 | 1518869 | 1281 + |
| CDN75_RS23740 | lolE  | 0.514  | 7.786  | 2.151E-08 | 3.505E-07 | 4571657 | 4572901 | 1245 + |
| CDN75_RS13430 | dppA  | 0.544  | 8.597  | 2.457E-08 | 3.988E-07 | 2559521 | 2561128 | 1608 - |
| CDN75_RS16290 | actP  | -0.722 | 7.074  | 2.471E-08 | 3.997E-07 | 3138012 | 3139661 | 1650 - |
| CDN75_RS07935 | hisS  | 0.510  | 9.177  | 2.698E-08 | 4.348E-07 | 1491455 | 1492729 | 1275 - |
| CDN75_RS03330 | cfa   | -0.680 | 8.588  | 2.737E-08 | 4.395E-07 | 598853  | 600001  | 1149 + |
| CDN75_RS10985 | uxaA  | -0.703 | 5.779  | 2.784E-08 | 4.453E-07 | 2095250 | 2096737 | 1488 - |
| CDN75_RS18085 | deoC  | -0.573 | 7.140  | 3.023E-08 | 4.819E-07 | 3473521 | 3474300 | 780 +  |
| CDN75_RS14455 | bgIF  | 0.690  | 7.176  | 3.056E-08 | 4.853E-07 | 2758481 | 2760358 | 1878 - |
| CDN75_RS00590 | narI  | 1.240  | 3.984  | 3.593E-08 | 5.684E-07 | 94136   | 94813   | 678 +  |
| CDN75_RS22275 | nfsA  | -0.540 | 6.807  | 3.694E-08 | 5.823E-07 | 4282804 | 4283526 | 723 +  |
| CDN75_RS14975 | rhtC  | 0.519  | 7.368  | 3.927E-08 | 6.154E-07 | 2862516 | 2863136 | 621 +  |
| CDN75_RS12905 | ugpB  | -0.568 | 6.215  | 3.932E-08 | 6.154E-07 | 2444432 | 2445748 | 1317 - |
| CDN75_RS13245 | mdtE  | -0.970 | 4.626  | 4.246E-08 | 6.622E-07 | 2512703 | 2513812 | 1110 + |
| CDN75_RS09575 | tas   | 0.557  | 8.085  | 4.360E-08 | 6.775E-07 | 1823686 | 1824726 | 1041 + |
| CDN75_RS21315 | asnB  | 0.496  | 9.617  | 4.435E-08 | 6.867E-07 | 4089133 | 4090797 | 1665 - |
| CDN75_RS10970 | alx   | 0.611  | 6.084  | 4.459E-08 | 6.880E-07 | 2092003 | 2092968 | 966 +  |
| CDN75_RS04580 | flhC  | -0.939 | 4.215  | 4.566E-08 | 7.020E-07 | 835905  | 836483  | 579 -  |
| CDN75_RS00330 | fadR  | 0.522  | 6.829  | 4.682E-08 | 7.173E-07 | 43226   | 43945   | 720 +  |
| CDN75_RS12010 | tsaC  | 0.503  | 6.821  | 4.866E-08 | 7.429E-07 | 2284265 | 2284837 | 573 -  |
| CDN75_RS00955 | cynX  | -1.137 | 3.365  | 5.134E-08 | 7.811E-07 | 147575  | 148729  | 1155 + |
| CDN75_RS04835 | flil  | 1.135  | 4.513  | 5.448E-08 | 8.260E-07 | 874417  | 875790  | 1374 + |
| CDN75_RS14690 | ilvG  | 0.546  | 7.580  | 5.678E-08 | 8.577E-07 | 2805320 | 2806964 | 1645 + |
| CDN75_RS14925 | yigB  | 0.590  | 7.257  | 5.946E-08 | 8.952E-07 | 2851942 | 2852658 | 717 +  |
| CDN75_RS23520 | flgC  | 1.077  | 3.723  | 6.159E-08 | 9.240E-07 | 4525775 | 4526179 | 405 +  |
| CDN75_RS06965 | yfcL  | 0.684  | 4.904  | 6.299E-08 | 9.418E-07 | 1302836 | 1303114 | 279 -  |
| CDN75_RS09630 | yqeF  | -0.621 | 7.002  | 6.366E-08 | 9.485E-07 | 1836500 | 1837681 | 1182 - |

|               |      |        |        |           |           |         |         |        |
|---------------|------|--------|--------|-----------|-----------|---------|---------|--------|
| CDN75_RS18460 | pdxA | 0.483  | 8.304  | 6.458E-08 | 9.590E-07 | 3550277 | 3551266 | 990 -  |
| CDN75_RS12340 | fkpA | 0.544  | 8.913  | 6.919E-08 | 1.024E-06 | 2330029 | 2330841 | 813 -  |
| CDN75_RS07500 | cysP | -1.246 | 6.321  | 7.328E-08 | 1.081E-06 | 1401457 | 1402473 | 1017 - |
| CDN75_RS04600 | otsB | 0.605  | 6.689  | 8.554E-08 | 1.257E-06 | 839450  | 840250  | 801 -  |
| CDN75_RS07945 | rodZ | 0.506  | 8.930  | 9.181E-08 | 1.345E-06 | 1493985 | 1494998 | 1014 - |
| CDN75_RS11565 | ptsN | 0.480  | 7.795  | 9.298E-08 | 1.358E-06 | 2200000 | 2200491 | 492 +  |
| CDN75_RS03580 | ydiV | 0.843  | 4.278  | 9.409E-08 | 1.369E-06 | 648747  | 649460  | 714 -  |
| CDN75_RS06180 | yejG | 0.559  | 7.620  | 9.901E-08 | 1.436E-06 | 1136951 | 1137295 | 345 -  |
| CDN75_RS06030 | yeiG | 0.535  | 7.134  | 1.032E-07 | 1.491E-06 | 1102968 | 1103804 | 837 +  |
| CDN75_RS22415 | ybjX | -0.542 | 8.403  | 1.047E-07 | 1.509E-06 | 4309748 | 4310704 | 957 -  |
| CDN75_RS07940 | ispG | 0.471  | 8.772  | 1.113E-07 | 1.598E-06 | 1492840 | 1493958 | 1119 - |
| CDN75_RS21925 | moaE | -0.676 | 5.012  | 1.145E-07 | 1.638E-06 | 4210915 | 4211367 | 453 +  |
| CDN75_RS24035 | ynfT | 1.135  | 6.293  | 1.206E-07 | 1.721E-06 | 490330  | 490443  | 114 +  |
| CDN75_RS13410 | dppF | 0.687  | 5.767  | 1.236E-07 | 1.758E-06 | 2555287 | 2556291 | 1005 - |
| CDN75_RS08555 | rnlA | 0.523  | 6.583  | 1.294E-07 | 1.834E-06 | 1618072 | 1619144 | 1073 + |
| CDN75_RS24360 | ynfU | 1.575  | 2.554  | 1.376E-07 | 1.944E-06 | 498245  | 498415  | 171 +  |
| CDN75_RS14285 | cbrA | -0.628 | 5.178  | 1.396E-07 | 1.966E-06 | 2724138 | 2725202 | 1065 + |
| CDN75_RS22535 | yeaC | -0.749 | 5.257  | 1.425E-07 | 2.000E-06 | 4337889 | 4338515 | 627 -  |
| CDN75_RS15780 | tuf  | -0.496 | 12.174 | 1.525E-07 | 2.134E-06 | 3030703 | 3031887 | 1185 + |
| CDN75_RS20080 | bolA | 0.558  | 6.833  | 1.835E-07 | 2.559E-06 | 3856256 | 3856573 | 318 +  |
| CDN75_RS17315 | yjgL | 0.620  | 5.169  | 1.854E-07 | 2.577E-06 | 3330859 | 3332673 | 1815 + |
| CDN75_RS13415 | dppD | 0.751  | 5.443  | 1.871E-07 | 2.592E-06 | 2556288 | 2557271 | 984 -  |
| CDN75_RS02285 | fdnG | 1.022  | 4.604  | 1.904E-07 | 2.630E-06 | 404843  | 407890  | 3048 + |
| CDN75_RS14750 | rhlB | 0.465  | 9.802  | 1.941E-07 | 2.673E-06 | 2819125 | 2820390 | 1266 - |
| CDN75_RS07445 | cysK | -0.513 | 9.548  | 2.027E-07 | 2.781E-06 | 1391354 | 1392325 | 972 +  |
| CDN75_RS00585 | narJ | 1.176  | 4.128  | 2.033E-07 | 2.781E-06 | 93426   | 94136   | 711 +  |
| CDN75_RS05900 | dld  | 0.508  | 8.277  | 2.055E-07 | 2.798E-06 | 1081243 | 1082958 | 1716 + |
| CDN75_RS10180 | ruvX | 0.499  | 6.457  | 2.058E-07 | 2.798E-06 | 1945588 | 1946004 | 417 +  |
| CDN75_RS21760 | aroG | 0.483  | 8.826  | 2.067E-07 | 2.802E-06 | 4177253 | 4178305 | 1053 + |
| CDN75_RS16900 | purA | -0.612 | 11.370 | 2.078E-07 | 2.808E-06 | 3259333 | 3260631 | 1299 + |
| CDN75_RS04700 | sdiA | 0.844  | 4.965  | 2.132E-07 | 2.871E-06 | 853973  | 854695  | 723 -  |
| CDN75_RS22270 | ybjC | -0.635 | 5.290  | 2.221E-07 | 2.982E-06 | 4282533 | 4282820 | 288 +  |
| CDN75_RS18485 | yabP | 0.817  | 5.202  | 2.424E-07 | 3.240E-06 | 3556324 | 3556974 | 651 +  |
| CDN75_RS01485 | ynaJ | 0.557  | 6.412  | 2.428E-07 | 3.240E-06 | 253608  | 253865  | 258 +  |
| CDN75_RS18515 | araA | -0.704 | 4.504  | 2.601E-07 | 3.461E-06 | 3564683 | 3566185 | 1503 - |
| CDN75_RS19485 | NA   | 0.677  | 4.775  | 2.660E-07 | 3.529E-06 | 3757308 | 3758012 | 705 +  |
| CDN75_RS10150 | galP | 0.912  | 7.258  | 2.694E-07 | 3.562E-06 | 1940372 | 1941766 | 1395 + |
| CDN75_RS16905 | nsrR | 0.609  | 7.323  | 2.716E-07 | 3.581E-06 | 3260836 | 3261261 | 426 +  |
| CDN75_RS21855 | ybhC | -0.565 | 7.744  | 2.820E-07 | 3.706E-06 | 4197618 | 4198901 | 1284 - |
| CDN75_RS15990 | iclR | 0.760  | 7.402  | 2.835E-07 | 3.716E-06 | 3077563 | 3078387 | 825 -  |
| CDN75_RS06895 | purF | -0.530 | 9.861  | 3.219E-07 | 4.207E-06 | 1287666 | 1289183 | 1518 - |
| CDN75_RS03065 | ydgA | 0.475  | 8.899  | 3.408E-07 | 4.439E-06 | 547292  | 548800  | 1509 + |
| CDN75_RS21090 | lipA | 0.458  | 9.051  | 3.441E-07 | 4.469E-06 | 4050871 | 4051836 | 966 -  |
| CDN75_RS11570 | rapZ | 0.477  | 8.568  | 3.601E-07 | 4.662E-06 | 2200537 | 2201391 | 855 +  |
| CDN75_RS23745 | nagK | 0.462  | 7.382  | 3.664E-07 | 4.730E-06 | 4572930 | 4573841 | 912 +  |
| CDN75_RS11595 | arcB | 0.495  | 8.398  | 3.849E-07 | 4.954E-06 | 2204111 | 2206447 | 2337 - |
| CDN75_RS19255 | gmhB | 0.532  | 6.619  | 3.938E-07 | 5.054E-06 | 3720680 | 3721255 | 576 +  |
| CDN75_RS08705 | gabP | -0.663 | 4.835  | 4.195E-07 | 5.369E-06 | 1646405 | 1647805 | 1401 + |
| CDN75_RS16730 | epmB | 0.449  | 7.075  | 4.277E-07 | 5.457E-06 | 3229275 | 3230303 | 1029 - |
| CDN75_RS23525 | flgD | 1.180  | 5.015  | 5.165E-07 | 6.572E-06 | 4526191 | 4526886 | 696 +  |
| CDN75_RS05915 | yohD | 0.586  | 5.339  | 5.244E-07 | 6.653E-06 | 1084859 | 1085437 | 579 +  |
| CDN75_RS02710 | ynfQ | 1.822  | 3.643  | 5.567E-07 | 7.042E-06 | 495696  | 495884  | 189 -  |
| CDN75_RS04645 | ftnA | 0.822  | 5.426  | 5.621E-07 | 7.089E-06 | 846579  | 847076  | 498 +  |
| CDN75_RS21980 | cecR | -0.509 | 6.216  | 5.670E-07 | 7.130E-06 | 4221592 | 4222263 | 672 -  |
| CDN75_RS12900 | ugpA | -0.775 | 4.308  | 5.718E-07 | 7.170E-06 | 2443447 | 2444334 | 888 -  |
| CDN75_RS16300 | acs  | -0.530 | 8.335  | 5.814E-07 | 7.270E-06 | 3140172 | 3142130 | 1959 - |
| CDN75_RS23540 | flgG | 1.069  | 4.538  | 5.989E-07 | 7.467E-06 | 4529066 | 4529848 | 783 +  |
| CDN75_RS22690 | gloC | 0.436  | 8.191  | 6.083E-07 | 7.562E-06 | 4376608 | 4377255 | 648 +  |
| CDN75_RS16755 | blc  | 0.618  | 5.808  | 6.122E-07 | 7.589E-06 | 3231835 | 3232368 | 534 -  |

|               |       |        |        |           |           |         |         |        |
|---------------|-------|--------|--------|-----------|-----------|---------|---------|--------|
| CDN75_RS20135 | ybaE  | -0.588 | 5.366  | 6.166E-07 | 7.621E-06 | 3867396 | 3869096 | 1701 - |
| CDN75_RS07715 | tmcA  | 0.438  | 7.554  | 6.184E-07 | 7.622E-06 | 1445998 | 1448013 | 2016 - |
| CDN75_RS06395 | rcsD  | 0.449  | 8.877  | 6.255E-07 | 7.689E-06 | 1172433 | 1175105 | 2673 + |
| CDN75_RS00335 | yegB  | 0.607  | 6.131  | 6.329E-07 | 7.757E-06 | 43997   | 45529   | 1533 - |
| CDN75_RS01220 | yciT  | 0.499  | 6.478  | 6.639E-07 | 8.114E-06 | 199840  | 200589  | 750 -  |
| CDN75_RS07930 | yfgM  | 0.429  | 7.828  | 6.844E-07 | 8.338E-06 | 1490817 | 1491437 | 621 -  |
| CDN75_RS03975 | yeaE  | 0.648  | 5.499  | 6.860E-07 | 8.338E-06 | 722222  | 723076  | 855 -  |
| CDN75_RS09900 | ygfX  | 0.499  | 6.357  | 6.977E-07 | 8.440E-06 | 1892505 | 1892912 | 408 -  |
| CDN75_RS22505 | lolA  | 0.505  | 7.145  | 6.983E-07 | 8.440E-06 | 4330330 | 4330941 | 612 +  |
| CDN75_RS01340 | pspA  | -0.530 | 5.749  | 7.034E-07 | 8.477E-06 | 224322  | 224990  | 669 +  |
| CDN75_RS24775 | ynfN  | 2.162  | 2.049  | 7.272E-07 | 8.741E-06 | 495394  | 495623  | 230 -  |
| CDN75_RS21975 | hlyD  | -0.562 | 6.594  | 7.482E-07 | 8.968E-06 | 4220594 | 4221589 | 996 -  |
| CDN75_RS07105 | yfdH  | 0.443  | 7.427  | 7.573E-07 | 9.052E-06 | 1327159 | 1328079 | 921 +  |
| CDN75_RS04285 | yebT  | 0.445  | 7.011  | 7.732E-07 | 9.217E-06 | 776149  | 778782  | 2634 + |
| CDN75_RS03090 | hdhA  | -0.571 | 6.182  | 8.386E-07 | 9.970E-06 | 554713  | 555480  | 768 -  |
| CDN75_RS04830 | fliH  | 1.092  | 4.095  | 8.413E-07 | 9.974E-06 | 873731  | 874417  | 687 +  |
| CDN75_RS17530 | fecA  | 0.478  | 11.290 | 8.450E-07 | 9.991E-06 | 3369775 | 3372099 | 2325 - |
| CDN75_RS06175 | yejF  | 0.523  | 7.801  | 9.060E-07 | 1.068E-05 | 1135358 | 1136947 | 1590 + |
| CDN75_RS02475 | NA    | -0.869 | 4.781  | 9.553E-07 | 1.123E-05 | 450107  | 455526  | 5420 - |
| CDN75_RS04490 | cutC  | 0.520  | 6.142  | 9.814E-07 | 1.151E-05 | 817159  | 817905  | 747 -  |
| CDN75_RS20925 | cstA  | -0.495 | 7.552  | 9.982E-07 | 1.168E-05 | 4021514 | 4023619 | 2106 + |
| CDN75_RS17635 | topAI | 0.785  | 4.672  | 1.021E-06 | 1.190E-05 | 3389218 | 3389475 | 258 -  |
| CDN75_RS00190 | ymgA  | -1.142 | 3.344  | 1.024E-06 | 1.190E-05 | 24356   | 24628   | 273 +  |
| CDN75_RS10900 | ebgR  | 0.744  | 5.656  | 1.026E-06 | 1.190E-05 | 2074889 | 2075872 | 984 +  |
| CDN75_RS22795 | ycbX  | 0.508  | 6.844  | 1.032E-06 | 1.195E-05 | 4399449 | 4400558 | 1110 - |
| CDN75_RS23200 | efeO  | -0.688 | 7.335  | 1.039E-06 | 1.199E-05 | 4475201 | 4476328 | 1128 + |
| CDN75_RS07925 | bamB  | 0.419  | 8.898  | 1.059E-06 | 1.219E-05 | 1489628 | 1490806 | 1179 - |
| CDN75_RS11350 | yrbN  | 0.558  | 6.533  | 1.063E-06 | 1.220E-05 | 2161275 | 2161355 | 81 -   |
| CDN75_RS09405 | fucI  | -0.504 | 5.806  | 1.107E-06 | 1.268E-05 | 1787673 | 1789448 | 1776 + |
| CDN75_RS14705 | ilvD  | 0.479  | 7.081  | 1.145E-06 | 1.307E-05 | 2808238 | 2810088 | 1851 + |
| CDN75_RS07270 | ypdB  | 0.539  | 5.482  | 1.193E-06 | 1.356E-05 | 1359328 | 1360062 | 735 +  |
| CDN75_RS20355 | ybaQ  | 0.609  | 5.602  | 1.194E-06 | 1.356E-05 | 3910002 | 3910343 | 342 +  |
| CDN75_RS06225 | yejM  | 0.428  | 8.443  | 1.271E-06 | 1.440E-05 | 1143434 | 1145194 | 1761 + |
| CDN75_RS04380 | hexR  | -0.534 | 6.017  | 1.285E-06 | 1.450E-05 | 795291  | 796160  | 870 +  |
| CDN75_RS15910 | zraS  | -0.641 | 4.745  | 1.287E-06 | 1.450E-05 | 3056685 | 3058082 | 1398 + |
| CDN75_RS07695 | yffB  | 0.579  | 5.506  | 1.309E-06 | 1.472E-05 | 1443401 | 1443757 | 357 +  |
| CDN75_RS16350 | gltP  | 0.448  | 8.987  | 1.371E-06 | 1.538E-05 | 3149239 | 3150552 | 1314 + |
| CDN75_RS06785 | alaA  | 0.486  | 7.372  | 1.449E-06 | 1.621E-05 | 1266506 | 1267723 | 1218 + |
| CDN75_RS00555 | narL  | -0.525 | 6.138  | 1.456E-06 | 1.624E-05 | 83466   | 84116   | 651 -  |
| CDN75_RS09370 | ppnN  | 0.492  | 8.936  | 1.540E-06 | 1.713E-05 | 1778397 | 1779761 | 1365 + |
| CDN75_RS13375 | bcsE  | 0.457  | 7.244  | 1.725E-06 | 1.915E-05 | 2549881 | 2551452 | 1572 + |
| CDN75_RS00570 | narK  | 1.004  | 3.987  | 1.791E-06 | 1.983E-05 | 86244   | 87635   | 1392 + |
| CDN75_RS15995 | metH  | 0.440  | 9.247  | 1.798E-06 | 1.985E-05 | 3078587 | 3082270 | 3684 + |
| CDN75_RS19060 | yaeH  | 0.513  | 6.237  | 1.890E-06 | 2.077E-05 | 3681557 | 3681943 | 387 -  |
| CDN75_RS17760 | uxuB  | -0.525 | 6.724  | 1.890E-06 | 2.077E-05 | 3409099 | 3410559 | 1461 + |
| CDN75_RS08505 | smpB  | 0.555  | 7.333  | 1.925E-06 | 2.110E-05 | 1607050 | 1607532 | 483 +  |
| CDN75_RS15920 | purD  | -0.485 | 10.397 | 2.019E-06 | 2.208E-05 | 3059401 | 3060690 | 1290 - |
| CDN75_RS21520 | pxpB  | 0.486  | 7.698  | 2.036E-06 | 2.220E-05 | 4135213 | 4135869 | 657 +  |
| CDN75_RS18775 | aroP  | 0.440  | 6.836  | 2.087E-06 | 2.270E-05 | 3618026 | 3619399 | 1374 - |
| CDN75_RS04595 | otsA  | 0.438  | 7.539  | 2.118E-06 | 2.298E-05 | 838051  | 839475  | 1425 - |
| CDN75_RS11005 | yqjA  | 0.591  | 6.608  | 2.132E-06 | 2.302E-05 | 2101196 | 2101858 | 663 +  |
| CDN75_RS09510 | ptrA  | 0.433  | 7.410  | 2.132E-06 | 2.302E-05 | 1808085 | 1810973 | 2889 - |
| CDN75_RS04780 | yedF  | -0.698 | 5.289  | 2.152E-06 | 2.318E-05 | 867342  | 867575  | 234 +  |
| CDN75_RS10660 | zupT  | 0.529  | 7.042  | 2.269E-06 | 2.438E-05 | 2034636 | 2035409 | 774 +  |
| CDN75_RS14270 | ibpA  | -0.501 | 7.584  | 2.404E-06 | 2.576E-05 | 2721770 | 2722183 | 414 -  |
| CDN75_RS07740 | gcvR  | 0.422  | 7.743  | 2.432E-06 | 2.600E-05 | 1452060 | 1452632 | 573 +  |
| CDN75_RS06355 | mqq   | 0.447  | 8.458  | 2.487E-06 | 2.652E-05 | 1164053 | 1165699 | 1647 - |
| CDN75_RS07670 | nudK  | 0.512  | 5.688  | 2.744E-06 | 2.919E-05 | 1435057 | 1435632 | 576 -  |
| CDN75_RS14205 | emrD  | -0.554 | 5.765  | 2.805E-06 | 2.977E-05 | 2708683 | 2709867 | 1185 + |

|               |      |        |        |           |           |         |         |        |
|---------------|------|--------|--------|-----------|-----------|---------|---------|--------|
| CDN75_RS11340 | mtr  | 0.504  | 6.028  | 2.830E-06 | 2.996E-05 | 2157995 | 2159239 | 1245 - |
| CDN75_RS04260 | htpX | 0.467  | 8.621  | 2.864E-06 | 3.024E-05 | 770334  | 771215  | 882 -  |
| CDN75_RS16295 | yjcH | -0.785 | 4.637  | 2.880E-06 | 3.034E-05 | 3139658 | 3139972 | 315 -  |
| CDN75_RS04630 | yecJ | 0.626  | 5.371  | 3.052E-06 | 3.208E-05 | 845370  | 845621  | 252 -  |
| CDN75_RS08380 | bamD | 0.517  | 8.791  | 3.142E-06 | 3.294E-05 | 1588300 | 1589037 | 738 +  |
| CDN75_RS16540 | pmrB | 0.566  | 5.802  | 3.195E-06 | 3.342E-05 | 3186828 | 3187928 | 1101 - |
| CDN75_RS02300 | yddM | 0.544  | 5.288  | 3.217E-06 | 3.356E-05 | 409840  | 410124  | 285 -  |
| CDN75_RS06510 | NA   | -0.936 | 3.922  | 3.270E-06 | 3.403E-05 | 1208596 | 1208838 | 243 +  |
| CDN75_RS18780 | pdhR | 0.422  | 9.634  | 3.342E-06 | 3.471E-05 | 3619940 | 3620704 | 765 +  |
| CDN75_RS18455 | rsmA | 0.408  | 8.540  | 3.444E-06 | 3.568E-05 | 3549459 | 3550280 | 822 -  |
| CDN75_RS06955 | fabB | -0.425 | 8.368  | 3.667E-06 | 3.790E-05 | 1299330 | 1300550 | 1221 - |
| CDN75_RS14980 | rhtB | 0.603  | 5.353  | 3.814E-06 | 3.932E-05 | 2863198 | 2863818 | 621 -  |
| CDN75_RS23020 | cspH | 1.111  | 3.247  | 3.981E-06 | 4.092E-05 | 4443921 | 4444133 | 213 -  |
| CDN75_RS14920 | xerC | 0.470  | 7.718  | 3.988E-06 | 4.092E-05 | 2851046 | 2851942 | 897 +  |
| CDN75_RS22510 | rarA | 0.407  | 7.491  | 4.128E-06 | 4.226E-05 | 4330952 | 4332295 | 1344 + |
| CDN75_RS21525 | pxpC | 0.447  | 7.855  | 4.153E-06 | 4.242E-05 | 4135863 | 4136795 | 933 +  |
| CDN75_RS14845 | NA   | 0.630  | 6.533  | 4.228E-06 | 4.308E-05 | 2837270 | 2837345 | 76 +   |
| CDN75_RS10110 | tkr  | -0.459 | 10.010 | 4.425E-06 | 4.498E-05 | 1931732 | 1933723 | 1992 - |
| CDN75_RS13370 | becR | 0.735  | 4.122  | 4.462E-06 | 4.526E-05 | 2549420 | 2549608 | 189 -  |
| CDN75_RS05290 | hisB | 0.444  | 7.404  | 4.526E-06 | 4.580E-05 | 951331  | 952398  | 1068 + |
| CDN75_RS19040 | dgt  | 0.468  | 6.423  | 4.866E-06 | 4.903E-05 | 3677085 | 3678602 | 1518 + |
| CDN75_RS16200 | tyrB | 0.401  | 8.108  | 4.868E-06 | 4.903E-05 | 3121873 | 3123066 | 1194 + |
| CDN75_RS15525 | hslU | -0.459 | 9.544  | 4.901E-06 | 4.925E-05 | 2975175 | 2976506 | 1332 - |
| CDN75_RS03005 | pntA | -0.464 | 7.640  | 4.921E-06 | 4.933E-05 | 533811  | 535343  | 1533 - |
| CDN75_RS09590 | galR | 0.609  | 5.859  | 5.049E-06 | 5.047E-05 | 1828688 | 1829719 | 1032 + |
| CDN75_RS04820 | flhF | 0.814  | 4.730  | 5.057E-06 | 5.047E-05 | 871092  | 872750  | 1659 + |
| CDN75_RS18760 | nadC | 0.469  | 7.089  | 5.265E-06 | 5.242E-05 | 3615600 | 3616493 | 894 -  |
| CDN75_RS02425 | ydeP | -0.771 | 4.039  | 5.515E-06 | 5.478E-05 | 441649  | 443928  | 2280 - |
| CDN75_RS14600 | rbsB | -0.575 | 11.415 | 5.566E-06 | 5.516E-05 | 2791039 | 2791929 | 891 +  |
| CDN75_RS15540 | cytR | -0.431 | 7.251  | 5.587E-06 | 5.524E-05 | 2978190 | 2979215 | 1026 - |
| CDN75_RS07100 | yfdG | 0.493  | 5.510  | 5.669E-06 | 5.594E-05 | 1326800 | 1327162 | 363 +  |
| CDN75_RS23730 | lolC | 0.412  | 7.594  | 5.757E-06 | 5.667E-05 | 4569764 | 4570963 | 1200 + |
| CDN75_RS22495 | NA   | 0.508  | 7.148  | 6.078E-06 | 5.970E-05 | 4325730 | 4326047 | 318 +  |
| CDN75_RS14580 | kup  | -0.516 | 5.693  | 6.103E-06 | 5.980E-05 | 2786077 | 2787945 | 1869 + |
| CDN75_RS02610 | mgtS | 1.852  | 0.938  | 6.129E-06 | 5.992E-05 | 480086  | 480181  | 96 +   |
| CDN75_RS18210 | thrA | 0.431  | 8.092  | 6.151E-06 | 6.000E-05 | 3498187 | 3500649 | 2463 + |
| CDN75_RS11560 | hpf  | 0.399  | 7.613  | 6.475E-06 | 6.296E-05 | 2199595 | 2199882 | 288 +  |
| CDN75_RS05950 | yohJ | 0.909  | 3.643  | 6.482E-06 | 6.296E-05 | 1089682 | 1090080 | 399 +  |
| CDN75_RS17720 | fimC | 1.188  | 3.311  | 6.520E-06 | 6.318E-05 | 3400502 | 3401227 | 726 +  |
| CDN75_RS04270 | proQ | 0.410  | 9.190  | 6.534E-06 | 6.318E-05 | 773475  | 774173  | 699 -  |
| CDN75_RS06995 | smrB | 0.533  | 5.983  | 6.623E-06 | 6.390E-05 | 1307551 | 1308102 | 552 +  |
| CDN75_RS15500 | glpK | -0.626 | 11.716 | 6.947E-06 | 6.688E-05 | 2970473 | 2971981 | 1509 - |
| CDN75_RS01160 | cysB | 0.497  | 7.831  | 7.005E-06 | 6.717E-05 | 190098  | 191072  | 975 +  |
| CDN75_RS00985 | mhpR | -0.504 | 6.013  | 7.032E-06 | 6.717E-05 | 155077  | 155910  | 834 -  |
| CDN75_RS14250 | NA   | -0.862 | 4.166  | 7.034E-06 | 6.717E-05 | 2716748 | 2718364 | 1617 - |
| CDN75_RS07200 | evgA | 0.475  | 7.001  | 7.040E-06 | 6.717E-05 | 1342700 | 1343314 | 615 +  |
| CDN75_RS13250 | mdtF | -0.531 | 6.601  | 7.209E-06 | 6.863E-05 | 2513837 | 2516950 | 3114 + |
| CDN75_RS05250 | yeeZ | 0.437  | 7.558  | 7.344E-06 | 6.964E-05 | 946167  | 946991  | 825 -  |
| CDN75_RS07960 | ndk  | -0.450 | 8.890  | 7.346E-06 | 6.964E-05 | 1496587 | 1497018 | 432 -  |
| CDN75_RS02305 | adhP | 0.502  | 6.055  | 7.533E-06 | 7.116E-05 | 410270  | 411280  | 1011 - |
| CDN75_RS09400 | fucP | -0.744 | 4.123  | 7.540E-06 | 7.116E-05 | 1786324 | 1787640 | 1317 + |
| CDN75_RS22335 | artQ | -0.443 | 7.014  | 7.666E-06 | 7.219E-05 | 4293154 | 4293870 | 717 -  |
| CDN75_RS12895 | ugpE | -0.719 | 4.372  | 7.693E-06 | 7.229E-05 | 2442605 | 2443450 | 846 -  |
| CDN75_RS01320 | puuC | 0.595  | 5.283  | 7.828E-06 | 7.341E-05 | 218986  | 220473  | 1488 + |
| CDN75_RS02660 | ydfK | 1.306  | 5.563  | 8.012E-06 | 7.497E-05 | 490512  | 490745  | 234 +  |
| CDN75_RS22480 | NA   | 0.467  | 7.247  | 8.038E-06 | 7.505E-05 | 4324215 | 4324415 | 201 +  |
| CDN75_RS14620 | yieP | 0.422  | 7.247  | 8.233E-06 | 7.671E-05 | 2795395 | 2796087 | 693 -  |
| CDN75_RS20625 | NA   | 0.439  | 6.413  | 8.317E-06 | 7.733E-05 | 3966599 | 3967612 | 1014 - |
| CDN75_RS13355 | becB | 0.423  | 7.318  | 8.351E-06 | 7.748E-05 | 2543691 | 2546030 | 2340 - |

|               |      |        |        |           |           |         |         |        |
|---------------|------|--------|--------|-----------|-----------|---------|---------|--------|
| CDN75_RS06620 | arnF | -0.689 | 4.123  | 8.381E-06 | 7.751E-05 | 1231837 | 1232223 | 387 +  |
| CDN75_RS10645 | ygiB | 0.437  | 8.423  | 8.390E-06 | 7.751E-05 | 2031830 | 2032501 | 672 +  |
| CDN75_RS03570 | hemP | 0.606  | 4.819  | 8.478E-06 | 7.815E-05 | 647053  | 647244  | 192 +  |
| CDN75_RS17955 | lgoR | -0.923 | 4.104  | 8.791E-06 | 8.087E-05 | 3451135 | 3452049 | 915 -  |
| CDN75_RS04870 | fliP | 1.146  | 3.448  | 8.841E-06 | 8.115E-05 | 879732  | 880469  | 738 +  |
| CDN75_RS22955 | appC | -0.707 | 4.228  | 8.969E-06 | 8.215E-05 | 4430698 | 4432242 | 1545 + |
| CDN75_RS04400 | znuA | 0.542  | 6.274  | 9.011E-06 | 8.237E-05 | 800290  | 801222  | 933 -  |
| CDN75_RS00480 | hemA | 0.393  | 7.911  | 9.077E-06 | 8.279E-05 | 72002   | 73258   | 1257 + |
| CDN75_RS01425 | ycjX | -0.572 | 6.160  | 9.178E-06 | 8.354E-05 | 240360  | 241757  | 1398 + |
| CDN75_RS07475 | yfeS | 0.722  | 4.248  | 9.289E-06 | 8.437E-05 | 1396694 | 1397428 | 735 +  |
| CDN75_RS09515 | recC | 0.404  | 8.359  | 9.347E-06 | 8.472E-05 | 1811149 | 1814517 | 3369 - |
| CDN75_RS02955 | ynfM | 0.613  | 8.655  | 9.877E-06 | 8.935E-05 | 527139  | 528392  | 1254 + |
| CDN75_RS13420 | dppC | 0.817  | 5.073  | 1.026E-05 | 9.265E-05 | 2557282 | 2558184 | 903 -  |
| CDN75_RS19320 | yafS | 0.516  | 6.050  | 1.030E-05 | 9.277E-05 | 3732663 | 3733385 | 723 +  |
| CDN75_RS18550 | thiB | -0.515 | 5.273  | 1.054E-05 | 9.475E-05 | 3572345 | 3573328 | 984 -  |
| CDN75_RS19065 | yaeI | 0.717  | 4.997  | 1.119E-05 | 1.004E-04 | 3682105 | 3682917 | 813 -  |
| CDN75_RS16225 | uvrA | 0.418  | 8.633  | 1.141E-05 | 1.022E-04 | 3125808 | 3128630 | 2823 - |
| CDN75_RS12015 | yrdD | 0.410  | 7.330  | 1.150E-05 | 1.028E-04 | 2284842 | 2285384 | 543 -  |
| CDN75_RS17525 | fecB | 0.446  | 8.815  | 1.162E-05 | 1.036E-04 | 3368828 | 3369730 | 903 -  |
| CDN75_RS16095 | malK | -0.716 | 7.236  | 1.171E-05 | 1.042E-04 | 3101543 | 3102658 | 1116 + |
| CDN75_RS05530 | dgcE | 0.434  | 6.718  | 1.177E-05 | 1.045E-04 | 1001127 | 1004444 | 3318 + |
| CDN75_RS14035 | gmk  | 0.397  | 8.519  | 1.184E-05 | 1.049E-04 | 2676189 | 2676812 | 624 +  |
| CDN75_RS20315 | ybaL | 0.399  | 8.318  | 1.191E-05 | 1.053E-04 | 3903346 | 3905022 | 1677 - |
| CDN75_RS23735 | lolD | 0.424  | 7.134  | 1.276E-05 | 1.126E-04 | 4570956 | 4571657 | 702 +  |
| CDN75_RS00345 | dadX | -0.514 | 9.168  | 1.281E-05 | 1.128E-04 | 47167   | 48237   | 1071 + |
| CDN75_RS03890 | ydjA | 0.437  | 6.761  | 1.319E-05 | 1.160E-04 | 705565  | 706116  | 552 -  |
| CDN75_RS13590 | avtA | 0.397  | 8.647  | 1.326E-05 | 1.163E-04 | 2593128 | 2594381 | 1254 + |
| CDN75_RS11440 | rlmE | 0.412  | 9.028  | 1.339E-05 | 1.170E-04 | 2180457 | 2181086 | 630 -  |
| CDN75_RS00390 | treA | -0.560 | 5.084  | 1.340E-05 | 1.170E-04 | 53967   | 55664   | 1698 - |
| CDN75_RS03460 | ydiJ | 0.396  | 9.049  | 1.347E-05 | 1.174E-04 | 623069  | 626125  | 3057 - |
| CDN75_RS16885 | hflK | 0.392  | 10.212 | 1.365E-05 | 1.188E-04 | 3256684 | 3257943 | 1260 + |
| CDN75_RS12950 | rpoH | 0.425  | 10.138 | 1.395E-05 | 1.212E-04 | 2453352 | 2454206 | 855 -  |
| CDN75_RS08430 | yfiB | 0.680  | 5.057  | 1.421E-05 | 1.232E-04 | 1595779 | 1596261 | 483 +  |
| CDN75_RS14265 | ibpB | -0.525 | 6.224  | 1.424E-05 | 1.232E-04 | 2721230 | 2721658 | 429 -  |
| CDN75_RS14385 | tnaA | -0.522 | 12.860 | 1.434E-05 | 1.238E-04 | 2743491 | 2744906 | 1416 + |
| CDN75_RS03455 | menI | 0.488  | 5.698  | 1.463E-05 | 1.261E-04 | 622662  | 623072  | 411 -  |
| CDN75_RS16160 | zur  | 0.592  | 6.407  | 1.509E-05 | 1.297E-04 | 3114247 | 3114762 | 516 -  |
| CDN75_RS06015 | folE | 0.393  | 8.125  | 1.525E-05 | 1.309E-04 | 1102042 | 1102710 | 669 -  |
| CDN75_RS11995 | yrdA | 0.454  | 6.851  | 1.529E-05 | 1.309E-04 | 2282658 | 2283212 | 555 +  |
| CDN75_RS15270 | yihT | -0.800 | 4.003  | 1.535E-05 | 1.312E-04 | 2926532 | 2927410 | 879 -  |
| CDN75_RS22835 | ycbZ | 0.400  | 8.484  | 1.541E-05 | 1.315E-04 | 4409497 | 4411257 | 1761 - |
| CDN75_RS12805 | asd  | 0.363  | 9.476  | 1.551E-05 | 1.321E-04 | 2427198 | 2428301 | 1104 - |
| CDN75_RS00530 | chaA | 0.412  | 7.024  | 1.557E-05 | 1.323E-04 | 79036   | 80136   | 1101 - |
| CDN75_RS16020 | lysC | 0.390  | 7.933  | 1.709E-05 | 1.449E-04 | 3086643 | 3087992 | 1350 - |
| CDN75_RS07275 | ypdC | 0.577  | 4.982  | 1.716E-05 | 1.452E-04 | 1360075 | 1360932 | 858 +  |
| CDN75_RS07405 | xapA | -1.669 | 1.984  | 1.729E-05 | 1.461E-04 | 1382990 | 1383823 | 834 -  |
| CDN75_RS23515 | flgB | 1.069  | 3.185  | 1.760E-05 | 1.484E-04 | 4525355 | 4525771 | 417 +  |
| CDN75_RS12940 | panM | 0.487  | 5.861  | 1.801E-05 | 1.516E-04 | 2451407 | 2451790 | 384 +  |
| CDN75_RS18765 | ampD | 0.571  | 5.843  | 1.860E-05 | 1.563E-04 | 3616581 | 3617132 | 552 +  |
| CDN75_RS09735 | actS | 0.429  | 5.999  | 1.923E-05 | 1.612E-04 | 1851225 | 1851980 | 756 -  |
| CDN75_RS04735 | fliC | 0.451  | 6.740  | 1.961E-05 | 1.640E-04 | 859973  | 861469  | 1497 - |
| CDN75_RS18850 | hpt  | 0.400  | 7.449  | 1.968E-05 | 1.643E-04 | 3639279 | 3639815 | 537 +  |
| CDN75_RS03055 | fumB | -0.426 | 10.166 | 1.971E-05 | 1.643E-04 | 544171  | 545817  | 1647 - |
| CDN75_RS04670 | NA   | 0.649  | 5.085  | 2.035E-05 | 1.693E-04 | 849777  | 849850  | 74 -   |
| CDN75_RS19365 | yafV | 0.533  | 5.693  | 2.054E-05 | 1.706E-04 | 3737266 | 3738036 | 771 -  |
| CDN75_RS05035 | amn  | 0.443  | 8.077  | 2.073E-05 | 1.718E-04 | 912924  | 914378  | 1455 + |
| CDN75_RS15040 | ubiB | 0.399  | 8.373  | 2.080E-05 | 1.721E-04 | 2874985 | 2876625 | 1641 + |
| CDN75_RS13450 | eptB | 0.447  | 6.622  | 2.109E-05 | 1.741E-04 | 2562207 | 2563898 | 1692 - |
| CDN75_RS19250 | metN | -0.438 | 6.714  | 2.123E-05 | 1.749E-04 | 3719461 | 3720492 | 1032 - |

|               |       |        |        |           |           |         |         |        |
|---------------|-------|--------|--------|-----------|-----------|---------|---------|--------|
| CDN75_RS22285 | ybjN  | -0.422 | 6.306  | 2.136E-05 | 1.757E-04 | 4284577 | 4285053 | 477 +  |
| CDN75_RS23460 | pyrC  | -0.385 | 8.125  | 2.239E-05 | 1.838E-04 | 4515898 | 4516944 | 1047 - |
| CDN75_RS04965 | hprS  | 0.622  | 5.195  | 2.310E-05 | 1.893E-04 | 894657  | 896015  | 1359 - |
| CDN75_RS04480 | torZ  | -0.657 | 4.220  | 2.329E-05 | 1.905E-04 | 813217  | 815646  | 2430 - |
| CDN75_RS13705 | yibF  | 0.427  | 6.725  | 2.361E-05 | 1.927E-04 | 2614770 | 2615378 | 609 -  |
| CDN75_RS03960 | msrB  | -0.400 | 6.730  | 2.376E-05 | 1.936E-04 | 719456  | 719869  | 414 -  |
| CDN75_RS05295 | hisH  | 0.428  | 6.253  | 2.406E-05 | 1.957E-04 | 952398  | 952988  | 591 +  |
| CDN75_RS04845 | fliK  | 0.984  | 4.131  | 2.424E-05 | 1.968E-04 | 876249  | 877376  | 1128 + |
| CDN75_RS10245 | mutY  | 0.403  | 6.904  | 2.603E-05 | 2.109E-04 | 1955101 | 1956153 | 1053 + |
| CDN75_RS15095 | yigZ  | 0.381  | 7.364  | 2.639E-05 | 2.134E-04 | 2887251 | 2887865 | 615 +  |
| CDN75_RS08735 | stpA  | -0.586 | 5.224  | 2.706E-05 | 2.185E-04 | 1650243 | 1650647 | 405 -  |
| CDN75_RS24040 | ynfR  | 2.369  | 0.456  | 2.723E-05 | 2.194E-04 | 495628  | 495693  | 66 -   |
| CDN75_RS01755 | nifJ  | -0.461 | 9.423  | 2.729E-05 | 2.195E-04 | 294702  | 298226  | 3525 - |
| CDN75_RS16385 | yjcS  | -0.945 | 3.782  | 2.748E-05 | 2.202E-04 | 3159259 | 3161244 | 1986 - |
| CDN75_RS18770 | ampE  | 0.533  | 5.843  | 2.748E-05 | 2.202E-04 | 3617129 | 3617983 | 855 +  |
| CDN75_RS13385 | bcsG  | 0.471  | 6.664  | 2.781E-05 | 2.225E-04 | 2551637 | 2553316 | 1680 + |
| CDN75_RS20410 | tesA  | 0.444  | 6.748  | 2.841E-05 | 2.268E-04 | 3920923 | 3921546 | 624 -  |
| CDN75_RS02005 | opgD  | 0.410  | 6.782  | 2.887E-05 | 2.300E-04 | 354298  | 355953  | 1656 + |
| CDN75_RS00500 | sirB1 | 0.384  | 7.531  | 2.975E-05 | 2.366E-04 | 75607   | 76416   | 810 +  |
| CDN75_RS19475 | NA    | 0.456  | 5.971  | 3.080E-05 | 2.446E-04 | 3755991 | 3757199 | 1209 - |
| CDN75_RS07585 | eutB  | 0.416  | 8.442  | 3.315E-05 | 2.627E-04 | 1416263 | 1417624 | 1362 - |
| CDN75_RS05875 | yehW  | 0.519  | 5.806  | 3.577E-05 | 2.830E-04 | 1074803 | 1075534 | 732 -  |
| CDN75_RS23555 | flgJ  | 0.797  | 4.029  | 3.702E-05 | 2.924E-04 | 4531708 | 4532649 | 942 +  |
| CDN75_RS16780 | frdA  | -0.373 | 8.056  | 3.772E-05 | 2.973E-04 | 3235156 | 3236964 | 1809 - |
| CDN75_RS13360 | bcsA  | 0.417  | 7.046  | 3.890E-05 | 3.061E-04 | 2546041 | 2548659 | 2619 - |
| CDN75_RS23015 | NA    | 0.420  | 8.568  | 3.930E-05 | 3.086E-04 | 4442791 | 4443488 | 698 +  |
| CDN75_RS17935 | btsT  | 1.171  | 8.656  | 3.949E-05 | 3.096E-04 | 3445327 | 3447477 | 2151 - |
| CDN75_RS03970 | yeaD  | -0.477 | 5.654  | 4.015E-05 | 3.142E-04 | 721290  | 722174  | 885 +  |
| CDN75_RS04355 | yebG  | 0.499  | 6.065  | 4.172E-05 | 3.259E-04 | 789096  | 789386  | 291 -  |
| CDN75_RS13980 | radC  | 0.417  | 6.685  | 4.194E-05 | 3.270E-04 | 2666651 | 2667319 | 669 -  |
| CDN75_RS07665 | ypfG  | 0.494  | 5.263  | 4.244E-05 | 3.300E-04 | 1433888 | 1434931 | 1044 - |
| CDN75_RS14915 | yigA  | 0.391  | 7.068  | 4.247E-05 | 3.300E-04 | 2850342 | 2851049 | 708 +  |
| CDN75_RS19450 | prfH  | 0.866  | 3.705  | 4.290E-05 | 3.327E-04 | 3751543 | 3752049 | 507 +  |
| CDN75_RS12040 | rsmB  | 0.412  | 7.579  | 4.334E-05 | 3.355E-04 | 2288629 | 2289918 | 1290 + |
| CDN75_RS08730 | ygaP  | 0.636  | 4.290  | 4.420E-05 | 3.416E-04 | 1649672 | 1650196 | 525 +  |
| CDN75_RS05615 | yegQ  | -0.459 | 7.123  | 4.462E-05 | 3.442E-04 | 1023529 | 1024890 | 1362 + |
| CDN75_RS01490 | uspE  | 0.386  | 8.022  | 4.535E-05 | 3.492E-04 | 253915  | 254865  | 951 -  |
| CDN75_RS20880 | fepD  | 0.420  | 6.529  | 4.634E-05 | 3.558E-04 | 4012805 | 4013809 | 1005 - |
| CDN75_RS10310 | sslE  | 0.383  | 8.191  | 4.636E-05 | 3.558E-04 | 1966637 | 1971199 | 4563 - |
| CDN75_RS21600 | sucA  | -0.388 | 12.662 | 4.724E-05 | 3.613E-04 | 4150326 | 4153127 | 2802 + |
| CDN75_RS11790 | aaeR  | 0.438  | 6.700  | 4.725E-05 | 3.613E-04 | 2242942 | 2243871 | 930 +  |
| CDN75_RS09855 | uacT  | -1.423 | 3.161  | 4.790E-05 | 3.656E-04 | 1883456 | 1884904 | 1449 + |
| CDN75_RS23245 | pgaA  | 0.464  | 5.567  | 4.800E-05 | 3.657E-04 | 4485310 | 4486446 | 1137 - |
| CDN75_RS04940 | yedJ  | 0.626  | 4.790  | 4.820E-05 | 3.666E-04 | 890247  | 890942  | 696 -  |
| CDN75_RS11395 | rimP  | 0.374  | 7.951  | 4.852E-05 | 3.684E-04 | 2170976 | 2171428 | 453 -  |
| CDN75_RS13300 | yhjE  | 0.439  | 5.749  | 4.912E-05 | 3.723E-04 | 2528209 | 2529531 | 1323 + |
| CDN75_RS06790 | yfbR  | 0.537  | 4.700  | 4.946E-05 | 3.743E-04 | 1267807 | 1268406 | 600 +  |
| CDN75_RS04120 | yoaA  | 0.386  | 6.740  | 4.991E-05 | 3.770E-04 | 748765  | 750675  | 1911 - |
| CDN75_RS09580 | lplT  | 0.442  | 5.753  | 5.047E-05 | 3.805E-04 | 1824758 | 1825951 | 1194 - |
| CDN75_RS02975 | ydgD  | 0.404  | 5.973  | 5.199E-05 | 3.913E-04 | 529400  | 530221  | 822 +  |
| CDN75_RS19990 | pgpA  | 0.369  | 6.968  | 5.223E-05 | 3.925E-04 | 3838373 | 3838891 | 519 +  |
| CDN75_RS22185 | pdeI  | -0.538 | 5.599  | 5.407E-05 | 4.056E-04 | 4264599 | 4266947 | 2349 + |
| CDN75_RS18450 | apaG  | 0.397  | 6.799  | 5.479E-05 | 4.103E-04 | 3549079 | 3549456 | 378 -  |
| CDN75_RS12020 | smg   | 0.360  | 7.842  | 5.601E-05 | 4.187E-04 | 2285413 | 2285886 | 474 -  |
| CDN75_RS11095 | tdcF  | 1.018  | 2.769  | 5.792E-05 | 4.322E-04 | 2113144 | 2113533 | 390 -  |
| CDN75_RS03335 | ribE  | 0.451  | 6.113  | 5.922E-05 | 4.412E-04 | 600041  | 600682  | 642 -  |
| CDN75_RS19300 | yafD  | 0.352  | 7.597  | 6.194E-05 | 4.607E-04 | 3728969 | 3729769 | 801 +  |
| CDN75_RS15175 | polA  | 0.369  | 8.867  | 6.287E-05 | 4.668E-04 | 2901725 | 2904511 | 2787 + |
| CDN75_RS04105 | fadD  | -0.416 | 6.777  | 6.365E-05 | 4.718E-04 | 745501  | 747186  | 1686 - |

|               |      |        |        |           |           |         |         |        |
|---------------|------|--------|--------|-----------|-----------|---------|---------|--------|
| CDN75_RS22350 | ybjP | -0.439 | 5.985  | 6.916E-05 | 5.109E-04 | 4295572 | 4296087 | 516 -  |
| CDN75_RS07135 | yfdN | -2.309 | 0.204  | 6.917E-05 | 5.109E-04 | 1331332 | 1331826 | 495 -  |
| CDN75_RS22685 | mepK | 0.360  | 7.806  | 6.934E-05 | 5.113E-04 | 4376033 | 4376581 | 549 +  |
| CDN75_RS23545 | flgH | 0.991  | 3.583  | 7.002E-05 | 5.155E-04 | 4529901 | 4530599 | 699 +  |
| CDN75_RS20230 | acrR | 0.440  | 5.629  | 7.419E-05 | 5.452E-04 | 3887545 | 3888192 | 648 +  |
| CDN75_RS03695 | tcyP | -0.654 | 7.747  | 7.443E-05 | 5.452E-04 | 668374  | 669765  | 1392 + |
| CDN75_RS15495 | glpX | -0.451 | 7.851  | 7.443E-05 | 5.452E-04 | 2969328 | 2970338 | 1011 - |
| CDN75_RS03025 | folM | 0.437  | 5.707  | 7.779E-05 | 5.689E-04 | 538416  | 539138  | 723 +  |
| CDN75_RS14380 | tnaC | -0.662 | 7.135  | 8.138E-05 | 5.941E-04 | 2743196 | 2743270 | 75 +   |
| CDN75_RS10840 | dnaG | -0.389 | 8.870  | 8.200E-05 | 5.976E-04 | 2064530 | 2066275 | 1746 + |
| CDN75_RS03040 | rstB | -0.366 | 7.084  | 8.231E-05 | 5.989E-04 | 540322  | 541623  | 1302 + |
| CDN75_RS11685 | nanT | -0.497 | 6.176  | 8.269E-05 | 6.006E-04 | 2224506 | 2225996 | 1491 - |
| CDN75_RS03985 | yeaG | 0.363  | 6.736  | 8.666E-05 | 6.284E-04 | 724348  | 726282  | 1935 + |
| CDN75_RS18465 | surA | 0.347  | 9.380  | 8.689E-05 | 6.291E-04 | 3551266 | 3552552 | 1287 - |
| CDN75_RS20175 | ybaY | 0.398  | 8.244  | 8.812E-05 | 6.369E-04 | 3877163 | 3877735 | 573 +  |
| CDN75_RS01445 | ycjG | 0.442  | 6.246  | 8.899E-05 | 6.421E-04 | 245173  | 246138  | 966 +  |
| CDN75_RS21565 | gltA | -0.410 | 11.648 | 9.140E-05 | 6.584E-04 | 4144805 | 4146088 | 1284 - |
| CDN75_RS02210 | NA   | -1.083 | 2.442  | 9.356E-05 | 6.729E-04 | 388028  | 389172  | 1145 + |
| CDN75_RS16890 | hflC | 0.360  | 9.558  | 9.603E-05 | 6.895E-04 | 3257946 | 3258950 | 1005 + |
| CDN75_RS16640 | lysS | -0.437 | 10.343 | 9.758E-05 | 6.994E-04 | 3207847 | 3209364 | 1518 - |
| CDN75_RS07700 | dapE | 0.415  | 7.579  | 9.882E-05 | 7.071E-04 | 1443761 | 1444888 | 1128 + |
| CDN75_RS15410 | sodA | -0.392 | 11.879 | 9.925E-05 | 7.091E-04 | 2955569 | 2956189 | 621 +  |
| CDN75_RS04660 | yecA | 0.526  | 6.526  | 1.009E-04 | 7.199E-04 | 848817  | 849482  | 666 -  |
| CDN75_RS08850 | NA   | 0.508  | 6.050  | 1.031E-04 | 7.345E-04 | 1670210 | 1670286 | 77 -   |
| CDN75_RS09075 | otnK | -0.539 | 4.552  | 1.036E-04 | 7.369E-04 | 1714486 | 1715652 | 1167 + |
| CDN75_RS19900 | brnQ | 0.335  | 7.723  | 1.050E-04 | 7.455E-04 | 3821375 | 3822694 | 1320 + |
| CDN75_RS11165 | garP | -0.706 | 4.028  | 1.055E-04 | 7.479E-04 | 2126996 | 2128330 | 1335 - |
| CDN75_RS17160 | tamB | 0.333  | 8.663  | 1.063E-04 | 7.511E-04 | 3299534 | 3303313 | 3780 + |
| CDN75_RS22630 | ycaQ | 0.403  | 5.989  | 1.063E-04 | 7.511E-04 | 4362347 | 4363579 | 1233 + |
| CDN75_RS12835 | yhhX | 0.339  | 7.597  | 1.077E-04 | 7.597E-04 | 2433191 | 2434228 | 1038 - |
| CDN75_RS23560 | flgK | 0.727  | 4.552  | 1.112E-04 | 7.828E-04 | 4532715 | 4534358 | 1644 + |
| CDN75_RS13290 | rcdB | -0.551 | 4.390  | 1.118E-04 | 7.857E-04 | 2525837 | 2526736 | 900 +  |
| CDN75_RS09550 | ptsP | 0.343  | 8.763  | 1.126E-04 | 7.902E-04 | 1818277 | 1820523 | 2247 - |
| CDN75_RS00185 | yegZ | -0.972 | 2.992  | 1.133E-04 | 7.939E-04 | 24077   | 24313   | 237 +  |
| CDN75_RS01430 | ycjF | -0.457 | 5.471  | 1.174E-04 | 8.215E-04 | 241754  | 242815  | 1062 + |
| CDN75_RS21965 | ybhS | -0.421 | 6.016  | 1.187E-04 | 8.287E-04 | 4217739 | 4218872 | 1134 - |
| CDN75_RS02765 | NA   | 1.205  | 1.775  | 1.216E-04 | 8.478E-04 | 501746  | 502024  | 279 -  |
| CDN75_RS07720 | ypfJ | 0.341  | 7.654  | 1.223E-04 | 8.512E-04 | 1448028 | 1448891 | 864 -  |
| CDN75_RS21905 | moaA | -0.345 | 7.738  | 1.254E-04 | 8.714E-04 | 4208664 | 4209653 | 990 +  |
| CDN75_RS16560 | adiY | -1.399 | 2.333  | 1.256E-04 | 8.714E-04 | 3191815 | 3192576 | 762 -  |
| CDN75_RS24555 | NA   | 1.010  | 2.679  | 1.283E-04 | 8.892E-04 | 3389966 | 3390097 | 132 -  |
| CDN75_RS06115 | fruB | -0.507 | 5.334  | 1.301E-04 | 8.998E-04 | 1121423 | 1122553 | 1131 - |
| CDN75_RS00445 | yehH | -0.491 | 5.071  | 1.311E-04 | 9.052E-04 | 67079   | 67357   | 279 +  |
| CDN75_RS15865 | rsd  | 0.355  | 7.305  | 1.315E-04 | 9.068E-04 | 3051091 | 3051567 | 477 -  |
| CDN75_RS03030 | ydgC | 0.543  | 4.600  | 1.317E-04 | 9.069E-04 | 539135  | 539470  | 336 -  |
| CDN75_RS04850 | fliL | 0.832  | 4.110  | 1.333E-04 | 9.164E-04 | 877481  | 877945  | 465 +  |
| CDN75_RS07970 | yfhM | 0.339  | 8.836  | 1.385E-04 | 9.503E-04 | 1499480 | 1504441 | 4962 - |
| CDN75_RS08860 | NA   | 0.521  | 5.827  | 1.402E-04 | 9.606E-04 | 1670624 | 1670700 | 77 -   |
| CDN75_RS15035 | ubiJ | 0.340  | 7.750  | 1.414E-04 | 9.671E-04 | 2874383 | 2874988 | 606 +  |
| CDN75_RS06400 | rcsB | 0.351  | 8.621  | 1.431E-04 | 9.776E-04 | 1175122 | 1175772 | 651 +  |
| CDN75_RS10070 | epd  | -0.404 | 8.121  | 1.482E-04 | 1.011E-03 | 1924760 | 1925779 | 1020 - |
| CDN75_RS08700 | gabT | -0.387 | 6.549  | 1.530E-04 | 1.042E-03 | 1644887 | 1646167 | 1281 + |
| CDN75_RS09985 | fau  | 0.427  | 7.078  | 1.533E-04 | 1.042E-03 | 1908275 | 1908877 | 603 +  |
| CDN75_RS02235 | yddE | 0.402  | 6.000  | 1.540E-04 | 1.045E-03 | 392407  | 393300  | 894 -  |
| CDN75_RS00800 | NA   | -1.551 | 1.273  | 1.554E-04 | 1.053E-03 | 126310  | 126606  | 297 -  |
| CDN75_RS09255 | ygcU | -0.970 | 3.129  | 1.590E-04 | 1.076E-03 | 1750115 | 1751569 | 1455 - |
| CDN75_RS01290 | ymjA | 0.462  | 4.942  | 1.606E-04 | 1.085E-03 | 213666  | 213911  | 246 -  |
| CDN75_RS10545 | ygiS | -0.411 | 6.579  | 1.609E-04 | 1.085E-03 | 2018197 | 2019804 | 1608 - |
| CDN75_RS15655 | argE | 0.378  | 6.956  | 1.661E-04 | 1.118E-03 | 3008455 | 3009606 | 1152 - |

|               |      |        |        |           |           |         |         |        |
|---------------|------|--------|--------|-----------|-----------|---------|---------|--------|
| CDN75_RS13760 | mtlD | -0.341 | 7.153  | 1.688E-04 | 1.135E-03 | 2627847 | 2628995 | 1149 + |
| CDN75_RS15360 | frvX | -0.645 | 4.128  | 1.709E-04 | 1.146E-03 | 2944614 | 2945684 | 1071 - |
| CDN75_RS07900 | guaA | 0.344  | 9.185  | 1.711E-04 | 1.146E-03 | 1483112 | 1484689 | 1578 - |
| CDN75_RS00735 | NA   | -0.450 | 5.705  | 1.712E-04 | 1.146E-03 | 118639  | 119832  | 1194 + |
| CDN75_RS05300 | hisA | 0.353  | 6.659  | 1.732E-04 | 1.157E-03 | 952988  | 953725  | 738 +  |
| CDN75_RS22015 | ybiJ | 0.530  | 5.157  | 1.739E-04 | 1.161E-03 | 4229285 | 4229545 | 261 -  |
| CDN75_RS11755 | mdh  | -0.353 | 11.295 | 1.792E-04 | 1.194E-03 | 2236752 | 2237690 | 939 -  |
| CDN75_RS16810 | asd  | 0.339  | 8.245  | 1.837E-04 | 1.222E-03 | 3244038 | 3245006 | 969 -  |
| CDN75_RS11555 | rpoN | 0.329  | 9.798  | 1.841E-04 | 1.223E-03 | 2198139 | 2199572 | 1434 + |
| CDN75_RS08180 | yfhH | 0.596  | 4.311  | 1.873E-04 | 1.242E-03 | 1550913 | 1551761 | 849 +  |
| CDN75_RS15530 | hslV | -0.380 | 7.862  | 1.904E-04 | 1.261E-03 | 2976516 | 2977046 | 531 -  |
| CDN75_RS08485 | recN | 0.451  | 5.453  | 1.964E-04 | 1.299E-03 | 1603949 | 1605610 | 1662 + |
| CDN75_RS21270 | miaB | -0.369 | 8.214  | 1.981E-04 | 1.308E-03 | 4085151 | 4086575 | 1425 - |
| CDN75_RS16455 | phnL | -0.645 | 3.820  | 2.069E-04 | 1.364E-03 | 3171862 | 3172542 | 681 -  |
| CDN75_RS22280 | rimK | -0.363 | 6.532  | 2.084E-04 | 1.372E-03 | 4283587 | 4284489 | 903 +  |
| CDN75_RS14320 | yidA | 0.336  | 7.241  | 2.096E-04 | 1.378E-03 | 2730901 | 2731713 | 813 -  |
| CDN75_RS06170 | yejE | 0.529  | 5.070  | 2.104E-04 | 1.381E-03 | 1134331 | 1135356 | 1026 + |
| CDN75_RS00730 | kch  | 0.746  | 3.712  | 2.152E-04 | 1.410E-03 | 116881  | 118134  | 1254 - |
| CDN75_RS12035 | fnt  | 0.342  | 8.791  | 2.167E-04 | 1.418E-03 | 2287636 | 2288583 | 948 +  |
| CDN75_RS14415 | adeP | 0.346  | 9.005  | 2.171E-04 | 1.419E-03 | 2750033 | 2751370 | 1338 - |
| CDN75_RS23710 | bhsA | 0.482  | 4.772  | 2.195E-04 | 1.432E-03 | 4563410 | 4563667 | 258 +  |
| CDN75_RS03295 | sodB | 0.333  | 8.324  | 2.234E-04 | 1.455E-03 | 592818  | 593399  | 582 +  |
| CDN75_RS08055 | hcaR | -0.427 | 6.250  | 2.282E-04 | 1.484E-03 | 1520160 | 1521050 | 891 -  |
| CDN75_RS20740 | ybcH | -0.732 | 3.790  | 2.288E-04 | 1.486E-03 | 3978711 | 3979601 | 891 -  |
| CDN75_RS14930 | uvrD | 0.324  | 9.149  | 2.296E-04 | 1.489E-03 | 2852742 | 2854904 | 2163 + |
| CDN75_RS01120 | rluB | 0.389  | 6.919  | 2.413E-04 | 1.562E-03 | 183095  | 183970  | 876 +  |
| CDN75_RS20255 | ybaN | 0.383  | 6.063  | 2.431E-04 | 1.572E-03 | 3892666 | 3893043 | 378 +  |
| CDN75_RS12350 | slyD | 0.370  | 9.655  | 2.506E-04 | 1.617E-03 | 2331329 | 2331919 | 591 -  |
| CDN75_RS11170 | garD | -0.497 | 4.836  | 2.509E-04 | 1.617E-03 | 2128705 | 2130276 | 1572 + |
| CDN75_RS18475 | djlA | 0.369  | 6.569  | 2.531E-04 | 1.628E-03 | 3555214 | 3556029 | 816 +  |
| CDN75_RS03755 | nadE | 0.374  | 7.462  | 2.534E-04 | 1.628E-03 | 679898  | 680725  | 828 +  |
| CDN75_RS04320 | yobA | 0.346  | 7.060  | 2.541E-04 | 1.628E-03 | 783234  | 783608  | 375 -  |
| CDN75_RS09505 | recB | 0.326  | 8.557  | 2.541E-04 | 1.628E-03 | 1804550 | 1808092 | 3543 - |
| CDN75_RS07840 | upp  | -0.428 | 6.602  | 2.602E-04 | 1.665E-03 | 1472400 | 1473026 | 627 -  |
| CDN75_RS14835 | thrP | 0.391  | 6.892  | 2.618E-04 | 1.673E-03 | 2835647 | 2837032 | 1386 + |
| CDN75_RS18665 | ftsW | 0.321  | 7.981  | 2.640E-04 | 1.684E-03 | 3596251 | 3597495 | 1245 + |
| CDN75_RS10525 | ygiQ | 0.328  | 7.693  | 2.717E-04 | 1.731E-03 | 2011013 | 2013232 | 2220 - |
| CDN75_RS23040 | gnsA | 0.924  | 3.446  | 2.726E-04 | 1.733E-03 | 4445025 | 4445198 | 174 +  |
| CDN75_RS03760 | cho  | 0.532  | 4.631  | 2.729E-04 | 1.733E-03 | 680955  | 681842  | 888 +  |
| CDN75_RS22810 | pqiA | 0.348  | 6.480  | 2.753E-04 | 1.746E-03 | 4404959 | 4406212 | 1254 + |
| CDN75_RS06520 | glpT | -0.553 | 10.740 | 2.759E-04 | 1.747E-03 | 1209961 | 1211319 | 1359 - |
| CDN75_RS00715 | yciU | 0.473  | 4.810  | 2.768E-04 | 1.750E-03 | 114686  | 115015  | 330 -  |
| CDN75_RS00665 | adhE | -0.333 | 9.738  | 2.782E-04 | 1.757E-03 | 103733  | 106408  | 2676 - |
| CDN75_RS08455 | ffh  | 0.319  | 9.171  | 2.849E-04 | 1.796E-03 | 1598588 | 1599949 | 1362 - |
| CDN75_RS19390 | dpaA | 0.334  | 7.628  | 2.881E-04 | 1.814E-03 | 3742912 | 3743652 | 741 -  |
| CDN75_RS09500 | recD | 0.320  | 7.075  | 2.914E-04 | 1.832E-03 | 1802724 | 1804550 | 1827 - |
| CDN75_RS23465 | yceB | 0.383  | 5.837  | 2.931E-04 | 1.840E-03 | 4517050 | 4517610 | 561 -  |
| CDN75_RS22345 | artP | -0.372 | 7.092  | 2.939E-04 | 1.843E-03 | 4294626 | 4295354 | 729 -  |
| CDN75_RS02545 | dgcF | 0.506  | 5.032  | 2.968E-04 | 1.856E-03 | 468347  | 469333  | 987 -  |
| CDN75_RS10490 | metC | 0.439  | 6.374  | 2.969E-04 | 1.856E-03 | 2004322 | 2005509 | 1188 + |
| CDN75_RS23550 | flgI | 0.948  | 4.092  | 3.022E-04 | 1.886E-03 | 4530611 | 4531708 | 1098 + |
| CDN75_RS11365 | rpsO | 0.359  | 9.452  | 3.029E-04 | 1.888E-03 | 2164837 | 2165106 | 270 -  |
| CDN75_RS07480 | cysM | 0.409  | 5.914  | 3.089E-04 | 1.923E-03 | 1397617 | 1398528 | 912 -  |
| CDN75_RS10950 | rlmG | 0.411  | 5.743  | 3.170E-04 | 1.970E-03 | 2088162 | 2089298 | 1137 - |
| CDN75_RS02395 | yddB | -0.445 | 5.946  | 3.181E-04 | 1.974E-03 | 432689  | 435061  | 2373 - |
| CDN75_RS13235 | gadE | -0.743 | 4.048  | 3.189E-04 | 1.976E-03 | 2511789 | 2512316 | 528 +  |
| CDN75_RS20860 | entF | 0.579  | 8.281  | 3.213E-04 | 1.989E-03 | 4005777 | 4009658 | 3882 + |
| CDN75_RS02355 | ddpA | -0.693 | 3.467  | 3.274E-04 | 2.024E-03 | 418373  | 419923  | 1551 - |
| CDN75_RS17360 | lptG | 0.323  | 7.584  | 3.299E-04 | 2.036E-03 | 3342740 | 3343822 | 1083 + |

|               |      |        |        |           |           |         |         |        |
|---------------|------|--------|--------|-----------|-----------|---------|---------|--------|
| CDN75_RS14445 | bgIH | -1.038 | 3.346  | 3.329E-04 | 2.050E-03 | 2755371 | 2756981 | 1611 - |
| CDN75_RS14310 | dgoR | -0.578 | 4.361  | 3.331E-04 | 2.050E-03 | 2729232 | 2729921 | 690 -  |
| CDN75_RS23440 | solA | 0.378  | 6.683  | 3.351E-04 | 2.060E-03 | 4513805 | 4514923 | 1119 - |
| CDN75_RS11810 | yhdE | 0.343  | 7.141  | 3.395E-04 | 2.081E-03 | 2251207 | 2251800 | 594 -  |
| CDN75_RS23700 | ycfJ | 0.364  | 6.167  | 3.396E-04 | 2.081E-03 | 4561936 | 4562475 | 540 +  |
| CDN75_RS13150 | rlmJ | 0.318  | 7.493  | 3.401E-04 | 2.081E-03 | 2498808 | 2499650 | 843 +  |
| CDN75_RS12685 | feoB | -0.453 | 7.357  | 3.421E-04 | 2.091E-03 | 2393829 | 2396150 | 2322 + |
| CDN75_RS07330 | NA   | -0.594 | 4.365  | 3.542E-04 | 2.162E-03 | 1373276 | 1374388 | 1113 + |
| CDN75_RS04205 | rlmA | 0.373  | 5.998  | 3.656E-04 | 2.228E-03 | 763691  | 764500  | 810 -  |
| CDN75_RS22645 | ycbJ | 0.480  | 4.654  | 3.696E-04 | 2.249E-03 | 4364710 | 4365603 | 894 +  |
| CDN75_RS16980 | ulaR | -0.508 | 4.565  | 3.761E-04 | 2.285E-03 | 3272344 | 3273099 | 756 -  |
| CDN75_RS23250 | dgcT | 0.632  | 4.400  | 3.811E-04 | 2.313E-03 | 4487033 | 4488391 | 1359 + |
| CDN75_RS06190 | bcr  | 0.313  | 7.651  | 3.909E-04 | 2.369E-03 | 1137628 | 1138818 | 1191 - |
| CDN75_RS16435 | phnP | -0.480 | 4.586  | 3.927E-04 | 2.376E-03 | 3168991 | 3169749 | 759 -  |
| CDN75_RS21130 | mrdB | 0.335  | 6.999  | 3.949E-04 | 2.386E-03 | 4056821 | 4057933 | 1113 - |
| CDN75_RS22785 | pyrD | -0.431 | 6.310  | 4.009E-04 | 2.417E-03 | 4397726 | 4398736 | 1011 + |
| CDN75_RS15200 | glnG | 0.359  | 6.930  | 4.011E-04 | 2.417E-03 | 2908628 | 2910037 | 1410 - |
| CDN75_RS20785 | cusA | -0.553 | 4.790  | 4.074E-04 | 2.452E-03 | 3990334 | 3993477 | 3144 + |
| CDN75_RS16875 | hfq  | 0.325  | 8.784  | 4.100E-04 | 2.463E-03 | 3254934 | 3255242 | 309 +  |
| CDN75_RS23210 | phoH | 0.350  | 6.467  | 4.110E-04 | 2.463E-03 | 4478226 | 4479014 | 789 +  |
| CDN75_RS21720 | NA   | -0.508 | 7.733  | 4.113E-04 | 2.463E-03 | 4172989 | 4173064 | 76 +   |
| CDN75_RS09070 | ltnD | -0.692 | 3.695  | 4.116E-04 | 2.463E-03 | 1713581 | 1714489 | 909 +  |
| CDN75_RS18505 | polB | 0.402  | 6.636  | 4.157E-04 | 2.484E-03 | 3561277 | 3563628 | 2352 - |
| CDN75_RS22545 | yczM | -0.874 | 3.235  | 4.217E-04 | 2.517E-03 | 4340187 | 4341617 | 1431 + |
| CDN75_RS21530 | pxpA | 0.348  | 7.000  | 4.250E-04 | 2.533E-03 | 4136785 | 4137519 | 735 +  |
| CDN75_RS01450 | mpaA | 0.366  | 6.067  | 4.259E-04 | 2.535E-03 | 246113  | 246841  | 729 -  |
| CDN75_RS14305 | dgoK | -0.630 | 3.877  | 4.283E-04 | 2.541E-03 | 2728357 | 2729235 | 879 -  |
| CDN75_RS06765 | nuoB | -0.335 | 9.669  | 4.286E-04 | 2.541E-03 | 1262896 | 1263558 | 663 -  |
| CDN75_RS18920 | yadL | -1.386 | 1.655  | 4.286E-04 | 2.541E-03 | 3649474 | 3650079 | 606 -  |
| CDN75_RS00625 | purU | 0.331  | 7.518  | 4.330E-04 | 2.563E-03 | 96069   | 96911   | 843 -  |
| CDN75_RS18335 | fkpB | 0.327  | 7.374  | 4.394E-04 | 2.597E-03 | 3523676 | 3524125 | 450 +  |
| CDN75_RS07705 | ypfN | 0.425  | 5.273  | 4.410E-04 | 2.604E-03 | 1444916 | 1445116 | 201 +  |
| CDN75_RS22700 | ompF | 0.463  | 11.535 | 4.442E-04 | 2.618E-03 | 4378852 | 4379940 | 1089 - |
| CDN75_RS17460 | nanX | -0.648 | 4.315  | 4.447E-04 | 2.618E-03 | 3359480 | 3360697 | 1218 + |
| CDN75_RS13630 | lyxK | -0.740 | 3.981  | 4.492E-04 | 2.641E-03 | 2600507 | 2602003 | 1497 + |
| CDN75_RS19470 | crl  | 0.351  | 7.937  | 4.551E-04 | 2.672E-03 | 3755676 | 3755978 | 303 +  |
| CDN75_RS15220 | typA | 0.354  | 10.729 | 4.576E-04 | 2.684E-03 | 2913166 | 2914989 | 1824 + |
| CDN75_RS13055 | rhsB | -0.579 | 4.675  | 4.597E-04 | 2.692E-03 | 2472615 | 2476850 | 4236 + |
| CDN75_RS04505 | argS | -0.360 | 8.217  | 4.629E-04 | 2.707E-03 | 818701  | 820434  | 1734 + |
| CDN75_RS10850 | rpoD | -0.325 | 10.294 | 4.656E-04 | 2.719E-03 | 2066470 | 2068311 | 1842 + |
| CDN75_RS17910 | hsdM | -0.336 | 7.250  | 4.687E-04 | 2.734E-03 | 3437657 | 3439246 | 1590 - |
| CDN75_RS21500 | ybgA | 0.512  | 4.778  | 4.758E-04 | 2.772E-03 | 4130621 | 4131130 | 510 +  |
| CDN75_RS23765 | potD | -0.316 | 7.674  | 4.855E-04 | 2.824E-03 | 4576120 | 4577166 | 1047 - |
| CDN75_RS02575 | ydeA | 0.495  | 4.614  | 4.907E-04 | 2.851E-03 | 474468  | 475658  | 1191 + |
| CDN75_RS07495 | cysT | -0.575 | 5.481  | 5.013E-04 | 2.908E-03 | 1400624 | 1401457 | 834 -  |
| CDN75_RS13240 | NA   | -0.955 | 2.241  | 5.071E-04 | 2.938E-03 | 2512317 | 2512595 | 279 -  |
| CDN75_RS05245 | yeeY | 0.551  | 5.594  | 5.079E-04 | 2.939E-03 | 945192  | 946121  | 930 -  |
| CDN75_RS08885 | recA | 0.394  | 8.846  | 5.143E-04 | 2.972E-03 | 1674859 | 1675920 | 1062 - |
| CDN75_RS11110 | tdcC | 0.516  | 5.301  | 5.150E-04 | 2.972E-03 | 2117109 | 2118440 | 1332 - |
| CDN75_RS07710 | ypfH | 0.400  | 5.783  | 5.178E-04 | 2.984E-03 | 1445226 | 1445924 | 699 -  |
| CDN75_RS03690 | ydjM | 0.897  | 3.077  | 5.200E-04 | 2.993E-03 | 667651  | 668241  | 591 +  |
| CDN75_RS16175 | dusA | 0.339  | 6.996  | 5.229E-04 | 3.006E-03 | 3116428 | 3117465 | 1038 + |
| CDN75_RS21515 | ybgI | 0.321  | 7.658  | 5.519E-04 | 3.168E-03 | 4134447 | 4135190 | 744 +  |
| CDN75_RS00810 | NA   | -0.309 | 7.531  | 5.606E-04 | 3.214E-03 | 127404  | 128270  | 867 -  |
| CDN75_RS14695 | ilvM | 0.925  | 2.813  | 5.649E-04 | 3.234E-03 | 2806961 | 2807224 | 264 +  |
| CDN75_RS05405 | galF | 0.360  | 8.041  | 5.667E-04 | 3.240E-03 | 971296  | 972189  | 894 -  |
| CDN75_RS10010 | argP | 0.403  | 7.022  | 5.700E-04 | 3.255E-03 | 1911841 | 1912734 | 894 +  |
| CDN75_RS11240 | agaI | -0.941 | 2.583  | 5.744E-04 | 3.276E-03 | 2139693 | 2140448 | 756 +  |
| CDN75_RS10500 | yqhC | -0.455 | 4.892  | 5.868E-04 | 3.342E-03 | 2006348 | 2007247 | 900 -  |

|               |      |        |        |           |           |         |         |        |
|---------------|------|--------|--------|-----------|-----------|---------|---------|--------|
| CDN75_RS16880 | hflX | 0.318  | 9.753  | 5.908E-04 | 3.360E-03 | 3255318 | 3256598 | 1281 + |
| CDN75_RS06815 | ackA | 0.395  | 9.033  | 5.947E-04 | 3.377E-03 | 1272415 | 1273617 | 1203 + |
| CDN75_RS23060 | torR | -0.529 | 4.376  | 5.953E-04 | 3.377E-03 | 4450220 | 4450912 | 693 -  |
| CDN75_RS14295 | dgoD | -0.743 | 3.844  | 6.049E-04 | 3.423E-03 | 2726611 | 2727759 | 1149 - |
| CDN75_RS23140 | rutC | -1.467 | 1.221  | 6.050E-04 | 3.423E-03 | 4464731 | 4465117 | 387 -  |
| CDN75_RS08280 | yfiE | 0.482  | 4.713  | 6.261E-04 | 3.538E-03 | 1566593 | 1567474 | 882 -  |
| CDN75_RS01225 | yciZ | 0.597  | 4.451  | 6.311E-04 | 3.561E-03 | 200679  | 200852  | 174 -  |
| CDN75_RS13515 | NA   | 0.582  | 4.358  | 6.411E-04 | 3.613E-03 | 2574103 | 2575472 | 1370 + |
| CDN75_RS02945 | mlc  | -0.408 | 5.264  | 6.490E-04 | 3.653E-03 | 524784  | 526004  | 1221 - |
| CDN75_RS12525 | yhfX | -0.983 | 2.804  | 6.537E-04 | 3.674E-03 | 2363235 | 2364398 | 1164 - |
| CDN75_RS15795 | rplK | -0.314 | 11.165 | 6.594E-04 | 3.698E-03 | 3033206 | 3033634 | 429 +  |
| CDN75_RS00195 | ariR | -1.003 | 3.399  | 6.595E-04 | 3.698E-03 | 24657   | 24923   | 267 +  |
| CDN75_RS06220 | yejL | 0.356  | 6.243  | 6.873E-04 | 3.846E-03 | 1143187 | 1143414 | 228 +  |
| CDN75_RS02725 | rzpQ | 1.247  | 2.266  | 6.876E-04 | 3.846E-03 | 496470  | 496967  | 498 -  |
| CDN75_RS17185 | ytfQ | -0.503 | 4.861  | 6.943E-04 | 3.878E-03 | 3305384 | 3306340 | 957 +  |
| CDN75_RS06430 | atoE | -0.970 | 2.518  | 7.137E-04 | 3.976E-03 | 1183701 | 1185023 | 1323 + |
| CDN75_RS15235 | yihN | -0.933 | 3.216  | 7.138E-04 | 3.976E-03 | 2917006 | 2918271 | 1266 + |
| CDN75_RS15195 | yshB | -0.421 | 5.703  | 7.241E-04 | 4.029E-03 | 2908406 | 2908516 | 111 -  |
| CDN75_RS12500 | yhfS | -0.579 | 4.054  | 7.283E-04 | 4.047E-03 | 2358357 | 2359442 | 1086 - |
| CDN75_RS14465 | phoU | 0.396  | 6.942  | 7.309E-04 | 4.056E-03 | 2761614 | 2762339 | 726 -  |
| CDN75_RS13260 | gadW | 0.338  | 5.981  | 7.360E-04 | 4.079E-03 | 2517313 | 2518041 | 729 -  |
| CDN75_RS05520 | dcd  | 0.341  | 7.317  | 7.388E-04 | 4.090E-03 | 999495  | 1000076 | 582 -  |
| CDN75_RS20105 | lon  | -0.340 | 10.218 | 7.448E-04 | 4.118E-03 | 3860672 | 3863026 | 2355 + |
| CDN75_RS07980 | sseB | -0.336 | 7.115  | 7.486E-04 | 4.133E-03 | 1506311 | 1507087 | 777 -  |
| CDN75_RS12390 | prkB | 0.340  | 7.004  | 7.688E-04 | 4.240E-03 | 2337912 | 2338781 | 870 +  |
| CDN75_RS12030 | def  | 0.306  | 7.916  | 7.714E-04 | 4.249E-03 | 2287112 | 2287621 | 510 +  |
| CDN75_RS06155 | pdeN | 0.367  | 6.395  | 7.724E-04 | 4.249E-03 | 1129784 | 1131340 | 1557 + |
| CDN75_RS20345 | ybaP | 0.414  | 6.166  | 7.804E-04 | 4.287E-03 | 3909070 | 3909864 | 795 -  |
| CDN75_RS15775 | NA   | -0.506 | 7.203  | 7.844E-04 | 4.301E-03 | 3030513 | 3030585 | 73 +   |
| CDN75_RS21305 | NA   | 0.745  | 2.885  | 7.849E-04 | 4.301E-03 | 4088677 | 4088753 | 77 -   |
| CDN75_RS12550 | gph  | -0.374 | 6.595  | 7.896E-04 | 4.321E-03 | 2367053 | 2367811 | 759 -  |
| CDN75_RS03360 | ydhR | 0.373  | 5.688  | 7.931E-04 | 4.335E-03 | 604140  | 604445  | 306 +  |
| CDN75_RS15210 | glnA | 0.409  | 11.208 | 7.941E-04 | 4.335E-03 | 2911384 | 2912793 | 1410 - |
| CDN75_RS07680 | narQ | 0.384  | 5.402  | 8.006E-04 | 4.365E-03 | 1437885 | 1439585 | 1701 + |
| CDN75_RS23105 | wrbA | -0.475 | 5.714  | 8.153E-04 | 4.440E-03 | 4460070 | 4460666 | 597 -  |
| CDN75_RS16280 | yjcE | 0.337  | 6.847  | 8.171E-04 | 4.444E-03 | 3134739 | 3136388 | 1650 + |
| CDN75_RS14850 | NA   | 0.564  | 4.702  | 8.235E-04 | 4.473E-03 | 2837366 | 2837451 | 86 +   |
| CDN75_RS22515 | serS | 0.304  | 10.243 | 8.340E-04 | 4.525E-03 | 4332386 | 4333678 | 1293 + |
| CDN75_RS10040 | yggE | -0.315 | 7.553  | 8.537E-04 | 4.626E-03 | 1919428 | 1920168 | 741 -  |
| CDN75_RS15180 | yihA | 0.302  | 7.181  | 8.576E-04 | 4.641E-03 | 2904892 | 2905524 | 633 -  |
| CDN75_RS02615 | dgcZ | 0.476  | 4.688  | 8.641E-04 | 4.664E-03 | 480400  | 481290  | 891 -  |
| CDN75_RS04350 | yebF | 0.329  | 6.243  | 8.646E-04 | 4.664E-03 | 788673  | 789029  | 357 -  |
| CDN75_RS13225 | hdeA | -0.675 | 7.805  | 8.662E-04 | 4.664E-03 | 2509831 | 2510163 | 333 -  |
| CDN75_RS16250 | soxS | 0.377  | 8.140  | 8.662E-04 | 4.664E-03 | 3131819 | 3132142 | 324 -  |
| CDN75_RS03450 | ydiH | 0.558  | 4.552  | 8.730E-04 | 4.695E-03 | 622374  | 622562  | 189 -  |
| CDN75_RS11815 | mreD | 0.312  | 6.634  | 8.799E-04 | 4.727E-03 | 2251809 | 2252297 | 489 -  |
| CDN75_RS06690 | yfbM | -1.343 | 1.449  | 8.904E-04 | 4.777E-03 | 1245879 | 1246382 | 504 +  |
| CDN75_RS14710 | ilvA | 0.307  | 6.805  | 8.958E-04 | 4.800E-03 | 2810091 | 2811635 | 1545 + |
| CDN75_RS04860 | fliN | 0.979  | 3.106  | 9.028E-04 | 4.832E-03 | 878951  | 879364  | 414 +  |
| CDN75_RS01945 | ydcF | -0.384 | 5.404  | 9.114E-04 | 4.872E-03 | 344677  | 345477  | 801 +  |
| CDN75_RS15280 | yihV | -0.624 | 3.814  | 9.142E-04 | 4.880E-03 | 2928498 | 2929394 | 897 +  |
| CDN75_RS00720 | cls  | 0.307  | 7.467  | 9.153E-04 | 4.880E-03 | 115050  | 116510  | 1461 - |
| CDN75_RS18340 | ispH | 0.298  | 8.309  | 9.176E-04 | 4.887E-03 | 3524127 | 3525077 | 951 +  |
| CDN75_RS13000 | yhhQ | -0.477 | 4.504  | 9.265E-04 | 4.924E-03 | 2462640 | 2463305 | 666 +  |
| CDN75_RS14375 | mnmE | -0.300 | 7.824  | 9.269E-04 | 4.924E-03 | 2741589 | 2742953 | 1365 + |
| CDN75_RS13075 | yhhJ | -0.359 | 6.742  | 9.344E-04 | 4.958E-03 | 2479102 | 2480226 | 1125 - |
| CDN75_RS14095 | setC | -1.005 | 2.827  | 9.416E-04 | 4.990E-03 | 2691714 | 2692898 | 1185 + |
| CDN75_RS00285 | pliG | -0.664 | 3.784  | 9.522E-04 | 5.040E-03 | 35359   | 35760   | 402 -  |
| CDN75_RS22240 | ybjI | 0.420  | 5.286  | 9.621E-04 | 5.086E-03 | 4276936 | 4277751 | 816 -  |

|               |       |        |       |           |           |         |         |        |
|---------------|-------|--------|-------|-----------|-----------|---------|---------|--------|
| CDN75_RS05515 | asmA  | 0.338  | 7.929 | 9.640E-04 | 5.091E-03 | 997620  | 999473  | 1854 - |
| CDN75_RS13265 | gadX  | 0.333  | 6.888 | 9.656E-04 | 5.093E-03 | 2518409 | 2519233 | 825 -  |
| CDN75_RS16775 | frdB  | -0.355 | 6.620 | 9.751E-04 | 5.136E-03 | 3234429 | 3235163 | 735 -  |
| CDN75_RS22095 | opgE  | 0.373  | 6.811 | 9.767E-04 | 5.138E-03 | 4242634 | 4244217 | 1584 - |
| CDN75_RS09385 | xni   | -0.401 | 5.156 | 9.901E-04 | 5.203E-03 | 1783144 | 1783899 | 756 +  |
| CDN75_RS18220 | thrC  | 0.321  | 7.402 | 9.930E-04 | 5.212E-03 | 3501584 | 3502870 | 1287 + |
| CDN75_RS16745 | ecnB  | 0.524  | 4.225 | 9.943E-04 | 5.212E-03 | 3231199 | 3231345 | 147 +  |
| CDN75_RS13010 | yhhS  | 0.314  | 8.281 | 9.999E-04 | 5.233E-03 | 2463939 | 2465156 | 1218 - |
| CDN75_RS15265 | yihS  | -0.504 | 4.943 | 1.001E-03 | 5.233E-03 | 2925274 | 2926515 | 1242 - |
| CDN75_RS19725 | hemB  | -0.356 | 8.001 | 1.025E-03 | 5.355E-03 | 3791260 | 3792234 | 975 -  |
| CDN75_RS05960 | cdd   | -0.371 | 6.123 | 1.027E-03 | 5.360E-03 | 1090902 | 1091786 | 885 +  |
| CDN75_RS10120 | speB  | 0.304  | 7.094 | 1.040E-03 | 5.418E-03 | 1934965 | 1935885 | 921 -  |
| CDN75_RS20365 | glsA  | -0.901 | 3.285 | 1.044E-03 | 5.434E-03 | 3913425 | 3914357 | 933 +  |
| CDN75_RS14290 | dgoT  | -0.613 | 4.380 | 1.061E-03 | 5.513E-03 | 2725199 | 2726536 | 1338 - |
| CDN75_RS09540 | thyA  | 0.287  | 8.093 | 1.062E-03 | 5.516E-03 | 1816450 | 1817244 | 795 -  |
| CDN75_RS12440 | tsgA  | 0.494  | 5.946 | 1.073E-03 | 5.565E-03 | 2345990 | 2347171 | 1182 + |
| CDN75_RS10000 | rpiA  | -0.299 | 7.551 | 1.079E-03 | 5.582E-03 | 1910754 | 1911413 | 660 -  |
| CDN75_RS05385 | rfbA  | 0.288  | 7.966 | 1.080E-03 | 5.582E-03 | 968001  | 968882  | 882 -  |
| CDN75_RS17385 | idnD  | -0.886 | 2.848 | 1.080E-03 | 5.582E-03 | 3348797 | 3349828 | 1032 - |
| CDN75_RS06135 | yeiQ  | -0.418 | 5.154 | 1.086E-03 | 5.605E-03 | 1125303 | 1126769 | 1467 + |
| CDN75_RS08480 | nadK  | 0.325  | 6.299 | 1.089E-03 | 5.612E-03 | 1602985 | 1603863 | 879 +  |
| CDN75_RS22225 | ybjG  | -0.452 | 5.737 | 1.096E-03 | 5.646E-03 | 4274412 | 4275008 | 597 -  |
| CDN75_RS22140 | ybiY  | -0.996 | 2.379 | 1.113E-03 | 5.723E-03 | 4254232 | 4255131 | 900 -  |
| CDN75_RS07435 | zipA  | 0.292  | 9.177 | 1.123E-03 | 5.770E-03 | 1389192 | 1390178 | 987 -  |
| CDN75_RS00630 | ychJ  | 0.372  | 5.875 | 1.139E-03 | 5.844E-03 | 96961   | 97419   | 459 -  |
| CDN75_RS16520 | crfC  | 0.507  | 5.362 | 1.147E-03 | 5.880E-03 | 3181782 | 3184010 | 2229 + |
| CDN75_RS16690 | dcuA  | -0.347 | 8.814 | 1.150E-03 | 5.886E-03 | 3220119 | 3221419 | 1301 - |
| CDN75_RS09150 | cysD  | -0.665 | 5.690 | 1.159E-03 | 5.926E-03 | 1727572 | 1728480 | 909 -  |
| CDN75_RS18345 | rihC  | -0.407 | 6.910 | 1.170E-03 | 5.974E-03 | 3525143 | 3526057 | 915 +  |
| CDN75_RS11510 | mldD  | 0.316  | 7.202 | 1.172E-03 | 5.978E-03 | 2191332 | 2191883 | 552 -  |
| CDN75_RS18945 | folK  | -0.381 | 5.422 | 1.180E-03 | 6.012E-03 | 3655101 | 3655580 | 480 -  |
| CDN75_RS06165 | yejB  | 0.441  | 5.000 | 1.197E-03 | 6.089E-03 | 1133237 | 1134331 | 1095 + |
| CDN75_RS21210 | hscC  | -0.637 | 3.649 | 1.198E-03 | 6.089E-03 | 4073343 | 4075013 | 1671 - |
| CDN75_RS08855 | NA    | 0.452  | 6.388 | 1.203E-03 | 6.107E-03 | 1670349 | 1670425 | 77 -   |
| CDN75_RS18950 | pcnB  | -0.340 | 9.086 | 1.208E-03 | 6.127E-03 | 3655577 | 3656974 | 1398 - |
| CDN75_RS02140 | mnaT  | 0.486  | 5.418 | 1.226E-03 | 6.210E-03 | 375770  | 376288  | 519 -  |
| CDN75_RS19290 | dkgB  | -0.453 | 4.478 | 1.229E-03 | 6.213E-03 | 3727014 | 3727817 | 804 +  |
| CDN75_RS15915 | zraR  | -0.360 | 5.854 | 1.231E-03 | 6.213E-03 | 3058079 | 3059404 | 1326 + |
| CDN75_RS23365 | clsC  | 0.383  | 5.967 | 1.231E-03 | 6.213E-03 | 4500632 | 4502113 | 1482 + |
| CDN75_RS12830 | yhhW  | 0.350  | 5.837 | 1.233E-03 | 6.216E-03 | 2432373 | 2433068 | 696 -  |
| CDN75_RS21790 | modF  | 0.358  | 6.723 | 1.245E-03 | 6.268E-03 | 4183936 | 4185408 | 1473 - |
| CDN75_RS02050 | insQ  | 0.334  | 6.020 | 1.246E-03 | 6.268E-03 | 361099  | 362307  | 1209 + |
| CDN75_RS08995 | hycE  | -0.585 | 3.904 | 1.252E-03 | 6.288E-03 | 1696913 | 1698622 | 1710 - |
| CDN75_RS24255 | NA    | -1.748 | 0.497 | 1.255E-03 | 6.299E-03 | 1331823 | 1332530 | 708 -  |
| CDN75_RS11740 | zapG  | 0.288  | 8.357 | 1.262E-03 | 6.324E-03 | 2233613 | 2234011 | 399 +  |
| CDN75_RS24860 | NA    | -1.521 | 0.566 | 1.270E-03 | 6.361E-03 | 4603081 | 4603594 | 514 +  |
| CDN75_RS09585 | aas   | 0.304  | 6.675 | 1.275E-03 | 6.376E-03 | 1825944 | 1828103 | 2160 - |
| CDN75_RS05310 | hisIE | 0.316  | 6.774 | 1.284E-03 | 6.412E-03 | 954477  | 955088  | 612 +  |
| CDN75_RS22110 | ybiR  | -0.456 | 4.366 | 1.288E-03 | 6.428E-03 | 4245267 | 4246385 | 1119 + |
| CDN75_RS04140 | pabB  | -0.413 | 5.586 | 1.312E-03 | 6.538E-03 | 752245  | 753606  | 1362 + |
| CDN75_RS10655 | ygiD  | 0.461  | 4.952 | 1.316E-03 | 6.553E-03 | 2033705 | 2034493 | 789 -  |
| CDN75_RS21845 | ybhI  | -1.258 | 2.095 | 1.319E-03 | 6.559E-03 | 4193507 | 4194940 | 1434 + |
| CDN75_RS07380 | NA    | 1.227  | 1.320 | 1.367E-03 | 6.778E-03 | 1380198 | 1380273 | 76 +   |
| CDN75_RS15300 | dtd   | 0.355  | 6.041 | 1.368E-03 | 6.778E-03 | 2931774 | 2932211 | 438 +  |
| CDN75_RS23205 | efeB  | -0.427 | 7.257 | 1.368E-03 | 6.778E-03 | 4476334 | 4477605 | 1272 + |
| CDN75_RS03790 | astA  | -0.396 | 5.635 | 1.372E-03 | 6.788E-03 | 687171  | 688205  | 1035 - |
| CDN75_RS07000 | yfcO  | 0.415  | 5.483 | 1.373E-03 | 6.788E-03 | 1308173 | 1308994 | 822 -  |
| CDN75_RS11840 | csrD  | 0.282  | 7.491 | 1.380E-03 | 6.814E-03 | 2254814 | 2256754 | 1941 - |
| CDN75_RS03590 | btuD  | 0.318  | 6.336 | 1.381E-03 | 6.815E-03 | 650249  | 650998  | 750 -  |

|               |      |        |        |           |           |         |         |        |
|---------------|------|--------|--------|-----------|-----------|---------|---------|--------|
| CDN75_RS05330 | wbbL | 0.331  | 5.966  | 1.390E-03 | 6.845E-03 | 959259  | 959612  | 354 -  |
| CDN75_RS11805 | rng  | 0.296  | 8.496  | 1.391E-03 | 6.845E-03 | 2249748 | 2251217 | 1470 - |
| CDN75_RS03680 | yniB | 0.361  | 5.774  | 1.397E-03 | 6.866E-03 | 666137  | 666673  | 537 -  |
| CDN75_RS16790 | yjeM | -0.489 | 4.367  | 1.425E-03 | 6.989E-03 | 3238485 | 3239987 | 1503 + |
| CDN75_RS04280 | yebS | 0.375  | 5.878  | 1.426E-03 | 6.989E-03 | 774897  | 776180  | 1284 + |
| CDN75_RS01335 | pspF | 0.534  | 4.675  | 1.426E-03 | 6.989E-03 | 223178  | 224155  | 978 -  |
| CDN75_RS20405 | ybbO | 0.300  | 7.057  | 1.428E-03 | 6.991E-03 | 3920124 | 3920933 | 810 -  |
| CDN75_RS18960 | dksA | -0.313 | 8.400  | 1.433E-03 | 7.006E-03 | 3657997 | 3658452 | 456 -  |
| CDN75_RS23660 | fluE | 0.489  | 6.622  | 1.435E-03 | 7.008E-03 | 4553699 | 4555888 | 2190 - |
| CDN75_RS23145 | rutB | -1.043 | 2.285  | 1.443E-03 | 7.039E-03 | 4465129 | 4465821 | 693 -  |
| CDN75_RS18405 | fixA | -1.075 | 1.974  | 1.450E-03 | 7.064E-03 | 3540253 | 3541023 | 771 +  |
| CDN75_RS19755 | ampH | -0.402 | 5.629  | 1.461E-03 | 7.108E-03 | 3797637 | 3798794 | 1158 - |
| CDN75_RS16815 | rsgA | 0.293  | 8.699  | 1.467E-03 | 7.130E-03 | 3245103 | 3246155 | 1053 - |
| CDN75_RS22190 | dgcI | -0.409 | 5.071  | 1.477E-03 | 7.174E-03 | 4266955 | 4268283 | 1329 + |
| CDN75_RS07820 | bepA | 0.305  | 7.419  | 1.484E-03 | 7.196E-03 | 1468248 | 1469711 | 1464 + |
| CDN75_RS09545 | lgt  | 0.292  | 7.837  | 1.485E-03 | 7.196E-03 | 1817251 | 1818126 | 876 -  |
| CDN75_RS08370 | yfiH | 0.347  | 6.605  | 1.494E-03 | 7.231E-03 | 1586457 | 1587188 | 732 -  |
| CDN75_RS09955 | ubiH | 0.286  | 8.463  | 1.501E-03 | 7.258E-03 | 1904428 | 1905606 | 1179 - |
| CDN75_RS18425 | yaaU | -0.932 | 3.091  | 1.511E-03 | 7.296E-03 | 3543657 | 3544988 | 1332 + |
| CDN75_RS02930 | dmsD | 0.448  | 5.413  | 1.553E-03 | 7.489E-03 | 521946  | 522560  | 615 +  |
| CDN75_RS20810 | ybdJ | 0.475  | 4.472  | 1.554E-03 | 7.489E-03 | 3997571 | 3997819 | 249 -  |
| CDN75_RS01905 | pdxI | -0.704 | 3.550  | 1.564E-03 | 7.526E-03 | 331663  | 332523  | 861 +  |
| CDN75_RS08570 | yfjQ | -0.843 | 2.717  | 1.579E-03 | 7.592E-03 | 1620818 | 1621639 | 822 +  |
| CDN75_RS03505 | ydiF | -1.075 | 2.380  | 1.584E-03 | 7.609E-03 | 633027  | 634622  | 1596 + |
| CDN75_RS24840 | NA   | -1.575 | 0.361  | 1.594E-03 | 7.642E-03 | 3775132 | 3775212 | 81 +   |
| CDN75_RS13210 | dctR | -0.893 | 2.776  | 1.595E-03 | 7.642E-03 | 2508106 | 2508636 | 531 +  |
| CDN75_RS02490 | lsrA | -0.751 | 3.075  | 1.623E-03 | 7.766E-03 | 458930  | 460465  | 1536 + |
| CDN75_RS05315 | wzzB | 0.314  | 8.050  | 1.637E-03 | 7.827E-03 | 955184  | 956164  | 981 -  |
| CDN75_RS21400 | NA   | 0.756  | 2.912  | 1.666E-03 | 7.956E-03 | 4107032 | 4107526 | 495 +  |
| CDN75_RS10095 | yggP | -1.037 | 2.675  | 1.699E-03 | 8.104E-03 | 1928267 | 1929544 | 1278 - |
| CDN75_RS22100 | mntS | 0.408  | 8.435  | 1.729E-03 | 8.241E-03 | 4244489 | 4244617 | 129 -  |
| CDN75_RS14780 | wzzE | 0.279  | 7.651  | 1.732E-03 | 8.243E-03 | 2823791 | 2824837 | 1047 + |
| CDN75_RS22410 | ybjD | -0.299 | 6.624  | 1.736E-03 | 8.255E-03 | 4308093 | 4309751 | 1659 + |
| CDN75_RS07735 | dapA | 0.279  | 9.424  | 1.745E-03 | 8.289E-03 | 1451036 | 1451914 | 879 -  |
| CDN75_RS14450 | bglB | -0.919 | 3.186  | 1.759E-03 | 8.345E-03 | 2757050 | 2758462 | 1413 - |
| CDN75_RS01860 | paaK | -0.409 | 5.311  | 1.772E-03 | 8.399E-03 | 319567  | 320880  | 1314 + |
| CDN75_RS11800 | yhdP | 0.271  | 8.477  | 1.859E-03 | 8.802E-03 | 2245880 | 2249680 | 3801 - |
| CDN75_RS18290 | nhaA | 0.288  | 7.207  | 1.883E-03 | 8.906E-03 | 3515339 | 3516505 | 1167 + |
| CDN75_RS00990 | mhpA | -0.811 | 2.944  | 1.905E-03 | 8.998E-03 | 156101  | 157765  | 1665 + |
| CDN75_RS24240 | NA   | -1.956 | -0.177 | 1.928E-03 | 9.089E-03 | 125785  | 125943  | 159 -  |
| CDN75_RS19630 | mhpF | -0.765 | 2.844  | 1.928E-03 | 9.089E-03 | 3775428 | 3776378 | 951 +  |
| CDN75_RS06160 | yejA | 0.353  | 5.922  | 1.931E-03 | 9.091E-03 | 1131422 | 1133236 | 1815 + |
| CDN75_RS09055 | mutS | -0.272 | 7.810  | 1.944E-03 | 9.137E-03 | 1709244 | 1711805 | 2562 + |
| CDN75_RS12405 | crp  | 0.298  | 9.865  | 1.945E-03 | 9.137E-03 | 2339542 | 2340174 | 633 +  |
| CDN75_RS18215 | thrB | 0.296  | 7.059  | 1.961E-03 | 9.200E-03 | 3500651 | 3501583 | 933 +  |
| CDN75_RS23750 | cobB | 0.307  | 6.849  | 1.965E-03 | 9.200E-03 | 4573857 | 4574696 | 840 +  |
| CDN75_RS17845 | yjiN | 0.405  | 5.371  | 1.967E-03 | 9.200E-03 | 3422164 | 3423444 | 1281 - |
| CDN75_RS12520 | yhfW | -0.655 | 3.396  | 1.968E-03 | 9.200E-03 | 2362009 | 2363235 | 1227 - |
| CDN75_RS06770 | nuoA | -0.288 | 9.374  | 1.970E-03 | 9.200E-03 | 1263574 | 1264017 | 444 -  |
| CDN75_RS04040 | dgcP | 0.347  | 6.483  | 1.971E-03 | 9.200E-03 | 735155  | 736180  | 1026 + |
| CDN75_RS18710 | secA | 0.276  | 9.884  | 1.977E-03 | 9.220E-03 | 3606127 | 3608832 | 2706 + |
| CDN75_RS12720 | gntT | -0.320 | 5.872  | 1.992E-03 | 9.270E-03 | 2399981 | 2401297 | 1317 + |
| CDN75_RS10505 | yqhD | -0.315 | 7.155  | 1.992E-03 | 9.270E-03 | 2007441 | 2008604 | 1164 + |
| CDN75_RS07865 | ppx  | 0.273  | 7.853  | 1.997E-03 | 9.282E-03 | 1477269 | 1478810 | 1542 + |
| CDN75_RS04690 | uvrY | 0.312  | 7.022  | 2.006E-03 | 9.315E-03 | 852566  | 853222  | 657 -  |
| CDN75_RS13230 | hdeD | -0.379 | 6.026  | 2.008E-03 | 9.315E-03 | 2510418 | 2510990 | 573 +  |
| CDN75_RS07470 | yfeK | 0.837  | 2.507  | 2.019E-03 | 9.353E-03 | 1396287 | 1396661 | 375 +  |
| CDN75_RS24000 | ymiC | 1.847  | 0.156  | 2.047E-03 | 9.476E-03 | 191815  | 191910  | 96 +   |
| CDN75_RS14410 | yieF | 0.315  | 6.108  | 2.064E-03 | 9.543E-03 | 2749413 | 2749979 | 567 +  |

|               |      |        |        |           |           |         |         |        |
|---------------|------|--------|--------|-----------|-----------|---------|---------|--------|
| CDN75_RS18545 | thiP | -0.372 | 5.228  | 2.069E-03 | 9.556E-03 | 3570759 | 3572369 | 1611 - |
| CDN75_RS14065 | xanP | -0.441 | 9.929  | 2.080E-03 | 9.597E-03 | 2683706 | 2685097 | 1392 + |
| CDN75_RS03600 | btuC | 0.322  | 6.064  | 2.097E-03 | 9.666E-03 | 651612  | 652592  | 981 -  |
| CDN75_RS13660 | yiaT | -1.159 | 2.450  | 2.106E-03 | 9.698E-03 | 2604551 | 2605291 | 741 -  |
| CDN75_RS04330 | yobB | 0.442  | 4.421  | 2.118E-03 | 9.740E-03 | 784079  | 784735  | 657 +  |
| CDN75_RS03675 | yniA | 0.309  | 6.328  | 2.127E-03 | 9.773E-03 | 665236  | 666096  | 861 +  |
| CDN75_RS24685 | ytiD | -1.019 | 1.976  | 2.136E-03 | 9.805E-03 | 3412852 | 3412995 | 144 +  |
| CDN75_RS08515 | intA | 0.276  | 7.045  | 2.146E-03 | 9.840E-03 | 1608313 | 1609554 | 1242 + |
| CDN75_RS20545 | purK | -0.320 | 9.556  | 2.158E-03 | 9.883E-03 | 3953311 | 3954378 | 1068 - |
| CDN75_RS20465 | allA | -0.836 | 2.423  | 2.161E-03 | 9.888E-03 | 3934235 | 3934717 | 483 +  |
| CDN75_RS10870 | nfeR | -0.320 | 6.456  | 2.189E-03 | 1.001E-02 | 2070202 | 2070825 | 624 +  |
| CDN75_RS14800 | rfaA | 0.310  | 7.250  | 2.193E-03 | 1.001E-02 | 2828368 | 2829249 | 882 +  |
| CDN75_RS22625 | lpxK | 0.289  | 7.213  | 2.215E-03 | 1.010E-02 | 4361324 | 4362310 | 987 +  |
| CDN75_RS15090 | pepQ | 0.273  | 9.506  | 2.217E-03 | 1.010E-02 | 2885920 | 2887251 | 1332 + |
| CDN75_RS04385 | pyk  | -0.300 | 8.605  | 2.221E-03 | 1.011E-02 | 796288  | 797730  | 1443 + |
| CDN75_RS06560 | rhmD | -0.747 | 2.812  | 2.264E-03 | 1.029E-02 | 1219154 | 1220359 | 1206 - |
| CDN75_RS23840 | ymfD | -0.800 | 2.493  | 2.272E-03 | 1.032E-02 | 4591204 | 4591869 | 666 -  |
| CDN75_RS19595 | NA   | 0.394  | 5.075  | 2.274E-03 | 1.032E-02 | 3770350 | 3771501 | 1152 + |
| CDN75_RS22025 | ybiX | 0.619  | 4.558  | 2.283E-03 | 1.035E-02 | 4230150 | 4230827 | 678 -  |
| CDN75_RS16915 | rlmB | 0.307  | 6.667  | 2.287E-03 | 1.035E-02 | 3263921 | 3264652 | 732 +  |
| CDN75_RS02390 | pqqL | -0.353 | 6.052  | 2.295E-03 | 1.038E-02 | 429849  | 432632  | 2784 - |
| CDN75_RS22995 | gfcC | -0.948 | 2.655  | 2.311E-03 | 1.044E-02 | 4440903 | 4441649 | 747 -  |
| CDN75_RS21225 | gltK | 0.378  | 5.129  | 2.330E-03 | 1.052E-02 | 4076875 | 4077549 | 675 -  |
| CDN75_RS07965 | pbpC | 0.353  | 6.247  | 2.335E-03 | 1.053E-02 | 1497167 | 1499479 | 2313 - |
| CDN75_RS08910 | srIB | 0.695  | 5.984  | 2.408E-03 | 1.084E-02 | 1679513 | 1679884 | 372 +  |
| CDN75_RS23810 | purB | -0.286 | 9.537  | 2.414E-03 | 1.086E-02 | 4584953 | 4586323 | 1371 - |
| CDN75_RS20370 | ybaT | -0.521 | 4.727  | 2.448E-03 | 1.100E-02 | 3914360 | 3915652 | 1293 + |
| CDN75_RS24375 | yecV | 1.746  | -0.137 | 2.472E-03 | 1.110E-02 | 820476  | 820520  | 45 -   |
| CDN75_RS18835 | yacC | 0.296  | 7.081  | 2.491E-03 | 1.118E-02 | 3634418 | 3634765 | 348 -  |
| CDN75_RS02985 | mdtJ | 0.757  | 3.230  | 2.516E-03 | 1.128E-02 | 530576  | 530941  | 366 -  |
| CDN75_RS08095 | yphC | -0.505 | 4.061  | 2.546E-03 | 1.139E-02 | 1526854 | 1527948 | 1095 - |
| CDN75_RS21005 | rna  | 0.301  | 6.814  | 2.548E-03 | 1.139E-02 | 4035817 | 4036623 | 807 -  |
| CDN75_RS21215 | rihA | -0.325 | 6.908  | 2.590E-03 | 1.157E-02 | 4075097 | 4076032 | 936 -  |
| CDN75_RS23005 | gfcA | 0.553  | 3.596  | 2.603E-03 | 1.161E-02 | 4442397 | 4442702 | 306 -  |
| CDN75_RS13995 | slmA | -0.298 | 7.265  | 2.648E-03 | 1.181E-02 | 2669254 | 2669850 | 597 +  |
| CDN75_RS08640 | ypjA | -0.496 | 5.608  | 2.652E-03 | 1.181E-02 | 1630299 | 1634879 | 4581 - |
| CDN75_RS01970 | cybB | 0.322  | 6.070  | 2.699E-03 | 1.201E-02 | 348344  | 348874  | 531 +  |
| CDN75_RS14235 | yidK | -0.719 | 3.733  | 2.708E-03 | 1.204E-02 | 2713162 | 2714877 | 1716 - |
| CDN75_RS04730 | fliA | 0.605  | 3.764  | 2.748E-03 | 1.220E-02 | 858933  | 859652  | 720 -  |
| CDN75_RS18410 | fixB | -0.974 | 2.181  | 2.779E-03 | 1.232E-02 | 3541038 | 3541979 | 942 +  |
| CDN75_RS03220 | slyB | -0.290 | 8.993  | 2.834E-03 | 1.255E-02 | 577316  | 577783  | 468 +  |
| CDN75_RS07580 | eutC | -0.469 | 4.073  | 2.839E-03 | 1.257E-02 | 1415355 | 1416242 | 888 -  |
| CDN75_RS07745 | bcp  | 0.268  | 8.341  | 2.843E-03 | 1.257E-02 | 1452632 | 1453102 | 471 +  |
| CDN75_RS01940 | hrpA | 0.265  | 8.345  | 2.845E-03 | 1.257E-02 | 340503  | 344405  | 3903 + |
| CDN75_RS19865 | rdgC | -0.375 | 5.933  | 2.856E-03 | 1.260E-02 | 3810892 | 3811803 | 912 -  |
| CDN75_RS18200 | yjtD | 0.420  | 5.360  | 2.870E-03 | 1.265E-02 | 3497140 | 3497826 | 687 +  |
| CDN75_RS07340 | NA   | 0.728  | 2.751  | 2.878E-03 | 1.267E-02 | 1376986 | 1377061 | 76 -   |
| CDN75_RS11665 | yhcG | 0.437  | 4.482  | 2.884E-03 | 1.269E-02 | 2221249 | 2222376 | 1128 + |
| CDN75_RS00935 | NA   | -0.551 | 3.652  | 2.892E-03 | 1.271E-02 | 142789  | 144381  | 1593 + |
| CDN75_RS10885 | ygiG | 0.310  | 5.921  | 2.905E-03 | 1.275E-02 | 2072917 | 2074296 | 1380 + |
| CDN75_RS09795 | yqcC | -0.763 | 2.563  | 2.920E-03 | 1.281E-02 | 1866376 | 1867146 | 771 -  |
| CDN75_RS00460 | prs  | -0.281 | 10.014 | 2.936E-03 | 1.286E-02 | 69216   | 70163   | 948 -  |
| CDN75_RS04765 | yedD | 0.330  | 6.291  | 2.938E-03 | 1.286E-02 | 865540  | 865953  | 414 -  |
| CDN75_RS16360 | fdhF | -0.351 | 6.079  | 2.948E-03 | 1.289E-02 | 3151866 | 3154013 | 2148 - |
| CDN75_RS00640 | rssB | 0.301  | 6.015  | 2.976E-03 | 1.300E-02 | 98529   | 99542   | 1014 + |
| CDN75_RS20585 | folD | 0.272  | 8.038  | 2.989E-03 | 1.304E-02 | 3958659 | 3959525 | 867 -  |
| CDN75_RS20605 | fimH | -0.996 | 1.965  | 2.999E-03 | 1.308E-02 | 3964126 | 3965103 | 978 +  |
| CDN75_RS23045 | yccM | 0.712  | 3.988  | 3.005E-03 | 1.309E-02 | 4445247 | 4446320 | 1074 - |
| CDN75_RS15520 | menA | -0.362 | 5.302  | 3.020E-03 | 1.314E-02 | 2974182 | 2975108 | 927 -  |

|               |      |        |        |           |           |         |         |        |
|---------------|------|--------|--------|-----------|-----------|---------|---------|--------|
| CDN75_RS18280 | NA   | -0.543 | 3.926  | 3.033E-03 | 1.318E-02 | 3513295 | 3514407 | 1113 + |
| CDN75_RS22175 | gsiC | 0.351  | 5.515  | 3.054E-03 | 1.326E-02 | 4262587 | 4263507 | 921 +  |
| CDN75_RS16490 | phnE | -0.836 | 3.222  | 3.070E-03 | 1.332E-02 | 3177090 | 3177877 | 788 -  |
| CDN75_RS02585 | marR | -0.361 | 5.061  | 3.088E-03 | 1.338E-02 | 476560  | 476994  | 435 +  |
| CDN75_RS13775 | yibL | 0.336  | 6.217  | 3.099E-03 | 1.342E-02 | 2630088 | 2630450 | 363 +  |
| CDN75_RS10780 | cca  | 0.285  | 7.816  | 3.121E-03 | 1.350E-02 | 2055315 | 2056553 | 1239 + |
| CDN75_RS14080 | yicJ | -0.653 | 3.823  | 3.132E-03 | 1.353E-02 | 2689308 | 2690690 | 1383 - |
| CDN75_RS04880 | fliR | 0.769  | 3.123  | 3.158E-03 | 1.363E-02 | 880756  | 881541  | 786 +  |
| CDN75_RS13365 | bcsQ | 0.337  | 5.503  | 3.162E-03 | 1.363E-02 | 2548656 | 2549384 | 729 -  |
| CDN75_RS07175 | dsdC | -0.547 | 3.692  | 3.179E-03 | 1.369E-02 | 1335639 | 1336574 | 936 -  |
| CDN75_RS21430 | kdpE | -0.416 | 4.395  | 3.247E-03 | 1.397E-02 | 4112676 | 4113353 | 678 -  |
| CDN75_RS07355 | yfeD | 0.410  | 5.129  | 3.257E-03 | 1.400E-02 | 1377758 | 1378150 | 393 +  |
| CDN75_RS07985 | pepB | -0.265 | 8.487  | 3.277E-03 | 1.407E-02 | 1507229 | 1508512 | 1284 - |
| CDN75_RS07045 | fadI | -0.330 | 6.778  | 3.279E-03 | 1.407E-02 | 1318104 | 1319414 | 1311 - |
| CDN75_RS09080 | ygbL | -0.577 | 3.413  | 3.317E-03 | 1.422E-02 | 1715744 | 1716382 | 639 +  |
| CDN75_RS06415 | atoC | -0.486 | 4.522  | 3.342E-03 | 1.431E-02 | 1180811 | 1182196 | 1386 + |
| CDN75_RS17060 | ytfB | 0.277  | 6.753  | 3.345E-03 | 1.431E-02 | 3282725 | 3283363 | 639 -  |
| CDN75_RS22160 | iaaA | -0.274 | 7.477  | 3.350E-03 | 1.432E-02 | 4258188 | 4259153 | 966 +  |
| CDN75_RS04975 | hiuH | -0.697 | 2.868  | 3.423E-03 | 1.461E-02 | 896819  | 897232  | 414 +  |
| CDN75_RS16255 | soxR | -0.538 | 3.725  | 3.451E-03 | 1.472E-02 | 3132228 | 3132692 | 465 +  |
| CDN75_RS20205 | maa  | 0.303  | 6.440  | 3.486E-03 | 1.486E-02 | 3881151 | 3881702 | 552 -  |
| CDN75_RS13605 | yiaK | -0.879 | 3.123  | 3.491E-03 | 1.486E-02 | 2596156 | 2597154 | 999 +  |
| CDN75_RS20490 | allW | -1.069 | 2.540  | 3.535E-03 | 1.504E-02 | 3939417 | 3940871 | 1455 + |
| CDN75_RS02375 | digH | -0.388 | 4.631  | 3.587E-03 | 1.524E-02 | 424946  | 426265  | 1320 - |
| CDN75_RS01880 | NA   | -0.519 | 4.120  | 3.627E-03 | 1.539E-02 | 322834  | 325359  | 2526 + |
| CDN75_RS24405 | tdcR | -1.646 | 0.023  | 3.655E-03 | 1.550E-02 | 2120803 | 2121021 | 219 +  |
| CDN75_RS11520 | mlaF | 0.267  | 8.406  | 3.663E-03 | 1.551E-02 | 2192678 | 2193487 | 810 -  |
| CDN75_RS10930 | fadH | -0.430 | 6.292  | 3.666E-03 | 1.551E-02 | 2085088 | 2087106 | 2019 + |
| CDN75_RS08265 | nadB | 0.495  | 4.953  | 3.678E-03 | 1.555E-02 | 1562574 | 1564196 | 1623 + |
| CDN75_RS07630 | eutT | -0.855 | 2.415  | 3.704E-03 | 1.565E-02 | 1425657 | 1426460 | 804 -  |
| CDN75_RS12355 | yheV | 0.416  | 4.535  | 3.709E-03 | 1.565E-02 | 2332014 | 2332214 | 201 -  |
| CDN75_RS13510 | hokA | 0.602  | 3.344  | 3.765E-03 | 1.587E-02 | 2573871 | 2574023 | 153 -  |
| CDN75_RS13220 | hdeB | -0.663 | 6.770  | 3.778E-03 | 1.591E-02 | 2509389 | 2509715 | 327 -  |
| CDN75_RS20485 | glxR | -0.966 | 2.030  | 3.798E-03 | 1.598E-02 | 3938370 | 3939248 | 879 +  |
| CDN75_RS10305 | pppA | 0.393  | 4.681  | 3.842E-03 | 1.615E-02 | 1965630 | 1966439 | 810 -  |
| CDN75_RS14315 | yidX | 0.389  | 4.703  | 3.853E-03 | 1.618E-02 | 2730199 | 2730855 | 657 +  |
| CDN75_RS04520 | flhA | 0.525  | 4.771  | 3.880E-03 | 1.628E-02 | 821611  | 823689  | 2079 - |
| CDN75_RS17280 | pyrB | -0.336 | 5.638  | 3.901E-03 | 1.635E-02 | 3326882 | 3327817 | 936 -  |
| CDN75_RS05235 | plaP | -0.307 | 7.013  | 3.931E-03 | 1.646E-02 | 943567  | 944925  | 1359 - |
| CDN75_RS13565 | xylG | -0.613 | 4.013  | 3.972E-03 | 1.662E-02 | 2585624 | 2587165 | 1542 + |
| CDN75_RS23340 | csgB | -1.330 | 0.818  | 3.989E-03 | 1.667E-02 | 4498288 | 4498743 | 456 +  |
| CDN75_RS09755 | xdhC | -0.728 | 2.681  | 4.052E-03 | 1.692E-02 | 1855578 | 1856057 | 480 +  |
| CDN75_RS12215 | gspA | -0.593 | 3.687  | 4.060E-03 | 1.694E-02 | 2307351 | 2308820 | 1470 - |
| CDN75_RS16805 | mscM | 0.251  | 7.784  | 4.080E-03 | 1.700E-02 | 3240693 | 3244016 | 3324 - |
| CDN75_RS21540 | abrB | 0.311  | 5.882  | 4.090E-03 | 1.703E-02 | 4138343 | 4139389 | 1047 - |
| CDN75_RS12915 | livG | 0.582  | 3.576  | 4.096E-03 | 1.704E-02 | 2446862 | 2447629 | 768 -  |
| CDN75_RS21445 | kdpB | -0.379 | 4.779  | 4.136E-03 | 1.719E-02 | 4116608 | 4118656 | 2049 - |
| CDN75_RS10100 | cmtA | -1.014 | 2.963  | 4.163E-03 | 1.728E-02 | 1929559 | 1930947 | 1389 - |
| CDN75_RS03165 | rsxE | 0.316  | 5.791  | 4.198E-03 | 1.741E-02 | 568268  | 568963  | 696 +  |
| CDN75_RS16990 | ulaA | -0.695 | 3.317  | 4.202E-03 | 1.741E-02 | 3274626 | 3276023 | 1398 + |
| CDN75_RS02450 | NA   | -1.326 | 0.634  | 4.223E-03 | 1.748E-02 | 447776  | 447984  | 209 -  |
| CDN75_RS15800 | rplA | -0.289 | 12.085 | 4.240E-03 | 1.754E-02 | 3033638 | 3034342 | 705 +  |
| CDN75_RS08915 | srlD | 0.633  | 7.709  | 4.257E-03 | 1.759E-02 | 1679888 | 1680667 | 780 +  |
| CDN75_RS03365 | ydhS | 0.383  | 4.917  | 4.263E-03 | 1.760E-02 | 604571  | 606175  | 1605 + |
| CDN75_RS07760 | hyfC | -1.116 | 1.826  | 4.288E-03 | 1.768E-02 | 1456001 | 1456948 | 948 +  |
| CDN75_RS10385 | pitB | -0.724 | 3.067  | 4.395E-03 | 1.811E-02 | 1986958 | 1988457 | 1500 - |
| CDN75_RS10355 | yghO | -0.391 | 5.382  | 4.406E-03 | 1.814E-02 | 1981129 | 1982265 | 1137 - |
| CDN75_RS24330 | NA   | -1.045 | 1.727  | 4.411E-03 | 1.814E-02 | 3973280 | 3973717 | 438 +  |
| CDN75_RS08020 | iscS | 0.259  | 10.377 | 4.483E-03 | 1.840E-02 | 1512471 | 1513685 | 1215 - |

|               |      |        |        |           |           |         |         |        |
|---------------|------|--------|--------|-----------|-----------|---------|---------|--------|
| CDN75_RS16150 | dinF | 0.339  | 5.117  | 4.483E-03 | 1.840E-02 | 3112555 | 3113880 | 1326 + |
| CDN75_RS04430 | yebB | -0.874 | 2.015  | 4.495E-03 | 1.842E-02 | 804890  | 805492  | 603 +  |
| CDN75_RS09775 | ygeY | -0.550 | 3.491  | 4.497E-03 | 1.842E-02 | 1860853 | 1862064 | 1212 + |
| CDN75_RS04340 | ptrB | 0.283  | 6.207  | 4.522E-03 | 1.851E-02 | 785418  | 787478  | 2061 - |
| CDN75_RS05435 | cpsG | -0.704 | 3.004  | 4.549E-03 | 1.860E-02 | 979471  | 980841  | 1371 - |
| CDN75_RS08905 | srlE | 0.673  | 7.078  | 4.561E-03 | 1.863E-02 | 1678543 | 1679502 | 960 +  |
| CDN75_RS23565 | flgL | 0.419  | 4.630  | 4.573E-03 | 1.867E-02 | 4534370 | 4535323 | 954 +  |
| CDN75_RS00980 | lacI | -0.329 | 6.257  | 4.580E-03 | 1.868E-02 | 153918  | 155000  | 1083 - |
| CDN75_RS19685 | NA   | -1.704 | -0.050 | 4.602E-03 | 1.875E-02 | 3785095 | 3785358 | 264 -  |
| CDN75_RS09950 | ubiI | 0.260  | 7.768  | 4.610E-03 | 1.876E-02 | 1903203 | 1904405 | 1203 - |
| CDN75_RS22470 | trxB | -0.277 | 8.381  | 4.625E-03 | 1.881E-02 | 4322705 | 4323670 | 966 -  |
| CDN75_RS00815 | NA   | -0.310 | 7.109  | 4.634E-03 | 1.883E-02 | 128407  | 129117  | 711 -  |
| CDN75_RS06840 | yfcF | 0.372  | 5.087  | 4.647E-03 | 1.886E-02 | 1278786 | 1279430 | 645 -  |
| CDN75_RS01975 | NA   | 0.480  | 4.006  | 4.728E-03 | 1.917E-02 | 349119  | 349292  | 174 +  |
| CDN75_RS09085 | ygbM | -0.559 | 3.420  | 4.790E-03 | 1.940E-02 | 1716387 | 1717163 | 777 +  |
| CDN75_RS18630 | rsmH | -0.257 | 7.528  | 4.816E-03 | 1.949E-02 | 3587942 | 3588883 | 942 +  |
| CDN75_RS11675 | nanK | -0.365 | 5.577  | 4.819E-03 | 1.949E-02 | 2222897 | 2223772 | 876 -  |
| CDN75_RS10475 | exbD | 0.323  | 8.105  | 4.850E-03 | 1.959E-02 | 2002904 | 2003329 | 426 -  |
| CDN75_RS09450 | csdE | 0.306  | 6.061  | 4.886E-03 | 1.968E-02 | 1796631 | 1797074 | 444 +  |
| CDN75_RS11515 | mIaE | 0.282  | 7.881  | 4.889E-03 | 1.968E-02 | 2191888 | 2192670 | 783 -  |
| CDN75_RS13550 | xylB | -0.606 | 3.876  | 4.893E-03 | 1.968E-02 | 2581340 | 2582794 | 1455 - |
| CDN75_RS12545 | trpS | -0.348 | 6.935  | 4.893E-03 | 1.968E-02 | 2366056 | 2367060 | 1005 - |
| CDN75_RS07520 | murQ | -0.446 | 4.300  | 4.894E-03 | 1.968E-02 | 1404718 | 1405614 | 897 +  |
| CDN75_RS18380 | caiD | -1.064 | 2.052  | 4.901E-03 | 1.969E-02 | 3533227 | 3534012 | 786 -  |
| CDN75_RS21785 | galE | 0.417  | 7.966  | 4.913E-03 | 1.972E-02 | 4182659 | 4183675 | 1017 - |
| CDN75_RS05430 | wcaJ | -0.662 | 3.123  | 4.966E-03 | 1.991E-02 | 978022  | 979416  | 1395 - |
| CDN75_RS15535 | ftsN | -0.276 | 7.906  | 5.005E-03 | 2.004E-02 | 2977139 | 2978098 | 960 -  |
| CDN75_RS22030 | fiu  | 0.552  | 7.376  | 5.007E-03 | 2.004E-02 | 4230869 | 4233151 | 2283 - |
| CDN75_RS16210 | aphA | -0.354 | 6.453  | 5.016E-03 | 2.006E-02 | 3124173 | 3124886 | 714 +  |
| CDN75_RS18150 | trpR | 0.390  | 4.634  | 5.030E-03 | 2.009E-02 | 3488958 | 3489284 | 327 +  |
| CDN75_RS21220 | gltL | 0.303  | 5.799  | 5.033E-03 | 2.009E-02 | 4076150 | 4076875 | 726 -  |
| CDN75_RS07265 | ypdA | 0.285  | 5.933  | 5.038E-03 | 2.009E-02 | 1357616 | 1359313 | 1698 + |
| CDN75_RS21010 | citT | -0.720 | 3.287  | 5.074E-03 | 2.022E-02 | 4036737 | 4038200 | 1464 - |
| CDN75_RS13675 | yiaW | -1.536 | 0.751  | 5.085E-03 | 2.023E-02 | 2607528 | 2607851 | 324 -  |
| CDN75_RS07755 | hyfB | -0.715 | 3.645  | 5.086E-03 | 2.023E-02 | 1453972 | 1455990 | 2019 + |
| CDN75_RS16555 | adiC | -0.785 | 3.420  | 5.101E-03 | 2.025E-02 | 3190341 | 3191678 | 1338 - |
| CDN75_RS15030 | ubiE | 0.262  | 8.592  | 5.102E-03 | 2.025E-02 | 2873614 | 2874369 | 756 +  |
| CDN75_RS01770 | ldhA | -0.336 | 5.679  | 5.117E-03 | 2.030E-02 | 299296  | 300285  | 990 -  |
| CDN75_RS14165 | ilvN | 0.415  | 6.373  | 5.126E-03 | 2.030E-02 | 2705563 | 2705853 | 291 -  |
| CDN75_RS06900 | cvpA | -0.322 | 8.172  | 5.127E-03 | 2.030E-02 | 1289220 | 1289708 | 489 -  |
| CDN75_RS17610 | sgcB | -0.990 | 1.458  | 5.134E-03 | 2.031E-02 | 3385677 | 3385955 | 279 -  |
| CDN75_RS05305 | hisF | 0.282  | 6.754  | 5.167E-03 | 2.040E-02 | 953707  | 954483  | 777 +  |
| CDN75_RS14815 | wzxE | 0.254  | 6.936  | 5.167E-03 | 2.040E-02 | 2831038 | 2832288 | 1251 + |
| CDN75_RS24400 | yqiM | 0.722  | 2.991  | 5.174E-03 | 2.041E-02 | 2101091 | 2101174 | 84 +   |
| CDN75_RS14520 | atpH | -0.267 | 10.790 | 5.187E-03 | 2.044E-02 | 2774631 | 2775164 | 534 -  |
| CDN75_RS00635 | rssA | 0.288  | 6.263  | 5.193E-03 | 2.044E-02 | 97532   | 98437   | 906 +  |
| CDN75_RS01245 | yciW | -0.379 | 5.123  | 5.196E-03 | 2.044E-02 | 205223  | 206350  | 1128 - |
| CDN75_RS07790 | hyfI | -0.743 | 2.772  | 5.209E-03 | 2.047E-02 | 1462860 | 1463618 | 759 +  |
| CDN75_RS16725 | yjeJ | 0.414  | 4.696  | 5.212E-03 | 2.047E-02 | 3228011 | 3228880 | 870 -  |
| CDN75_RS14470 | pstB | 0.334  | 6.998  | 5.241E-03 | 2.056E-02 | 2762354 | 2763127 | 774 -  |
| CDN75_RS18500 | rapA | -0.281 | 8.287  | 5.253E-03 | 2.059E-02 | 3558206 | 3561112 | 2907 - |
| CDN75_RS12485 | frlC | -0.588 | 3.218  | 5.281E-03 | 2.068E-02 | 2355762 | 2356592 | 831 +  |
| CDN75_RS20030 | yajQ | -0.287 | 7.469  | 5.286E-03 | 2.068E-02 | 3846467 | 3846958 | 492 +  |
| CDN75_RS02290 | fdnH | 0.709  | 3.160  | 5.333E-03 | 2.085E-02 | 407903  | 408787  | 885 +  |
| CDN75_RS18915 | yadK | -1.315 | 0.569  | 5.340E-03 | 2.086E-02 | 3648851 | 3649447 | 597 -  |
| CDN75_RS17785 | iraD | -0.743 | 2.740  | 5.369E-03 | 2.095E-02 | 3413191 | 3413583 | 393 +  |
| CDN75_RS21415 | potE | -0.485 | 4.011  | 5.377E-03 | 2.095E-02 | 4108566 | 4109885 | 1320 - |
| CDN75_RS16495 | phnD | -1.107 | 2.163  | 5.380E-03 | 2.095E-02 | 3177983 | 3178999 | 1017 - |
| CDN75_RS09215 | cysJ | -0.494 | 7.342  | 5.382E-03 | 2.095E-02 | 1742250 | 1744049 | 1800 - |

|               |      |        |        |           |           |         |         |        |
|---------------|------|--------|--------|-----------|-----------|---------|---------|--------|
| CDN75_RS18070 | yjIV | -0.505 | 4.041  | 5.390E-03 | 2.096E-02 | 3469679 | 3470458 | 780 +  |
| CDN75_RS15230 | yihM | -0.666 | 3.307  | 5.438E-03 | 2.109E-02 | 2915924 | 2916904 | 981 +  |
| CDN75_RS18095 | deoB | -0.248 | 9.730  | 5.439E-03 | 2.109E-02 | 3475801 | 3477024 | 1224 + |
| CDN75_RS10065 | pgk  | -0.253 | 10.143 | 5.442E-03 | 2.109E-02 | 1923547 | 1924710 | 1164 - |
| CDN75_RS15610 | frwC | -0.934 | 2.782  | 5.443E-03 | 2.109E-02 | 2997289 | 2998368 | 1080 + |
| CDN75_RS01835 | paaF | -0.817 | 2.108  | 5.462E-03 | 2.113E-02 | 314939  | 315706  | 768 +  |
| CDN75_RS19950 | tsx  | -0.274 | 9.830  | 5.465E-03 | 2.113E-02 | 3832913 | 3833797 | 885 -  |
| CDN75_RS20715 | ompT | -0.332 | 9.239  | 5.485E-03 | 2.120E-02 | 3976300 | 3977253 | 954 -  |
| CDN75_RS18400 | caiT | -0.693 | 3.233  | 5.516E-03 | 2.130E-02 | 3538267 | 3539781 | 1515 - |
| CDN75_RS23505 | flgM | 0.523  | 3.872  | 5.535E-03 | 2.135E-02 | 4524172 | 4524465 | 294 -  |
| CDN75_RS10665 | yqiD | 0.801  | 2.072  | 5.549E-03 | 2.138E-02 | 2035467 | 2035637 | 171 -  |
| CDN75_RS16565 | adiA | -0.313 | 5.542  | 5.554E-03 | 2.138E-02 | 3192901 | 3195168 | 2268 - |
| CDN75_RS23795 | roxA | 0.249  | 7.887  | 5.571E-03 | 2.143E-02 | 4581456 | 4582577 | 1122 - |
| CDN75_RS11585 | mtgA | -0.276 | 7.349  | 5.589E-03 | 2.148E-02 | 2202503 | 2203231 | 729 -  |
| CDN75_RS07610 | eutE | -0.806 | 2.328  | 5.613E-03 | 2.156E-02 | 1422503 | 1423906 | 1404 - |
| CDN75_RS15675 | oxyR | 0.241  | 8.599  | 5.623E-03 | 2.156E-02 | 3013249 | 3014166 | 918 +  |
| CDN75_RS11160 | garL | -0.517 | 3.608  | 5.623E-03 | 2.156E-02 | 2126210 | 2126980 | 771 -  |
| CDN75_RS12335 | yheO | 0.260  | 7.253  | 5.670E-03 | 2.172E-02 | 2329140 | 2329862 | 723 -  |
| CDN75_RS07635 | eutQ | -0.954 | 1.869  | 5.687E-03 | 2.176E-02 | 1426457 | 1427158 | 702 -  |
| CDN75_RS11480 | ispB | 0.253  | 8.321  | 5.709E-03 | 2.181E-02 | 2187132 | 2188103 | 972 +  |
| CDN75_RS09965 | ygfB | 0.253  | 7.935  | 5.710E-03 | 2.181E-02 | 1906954 | 1907532 | 579 -  |
| CDN75_RS13625 | yiaO | -0.865 | 2.568  | 5.768E-03 | 2.200E-02 | 2599517 | 2600503 | 987 +  |
| CDN75_RS21535 | nei  | 0.277  | 6.167  | 5.768E-03 | 2.200E-02 | 4137555 | 4138346 | 792 +  |
| CDN75_RS18235 | yaaJ | 0.352  | 5.391  | 5.803E-03 | 2.211E-02 | 3504379 | 3505809 | 1431 - |
| CDN75_RS15255 | yihQ | -0.556 | 3.993  | 5.854E-03 | 2.228E-02 | 2921999 | 2924035 | 2037 - |
| CDN75_RS15305 | fabY | 0.278  | 7.306  | 5.860E-03 | 2.229E-02 | 2932256 | 2933197 | 942 +  |
| CDN75_RS13560 | xyfI | -0.635 | 3.750  | 5.913E-03 | 2.247E-02 | 2584554 | 2585546 | 993 +  |
| CDN75_RS15395 | rhaS | -0.551 | 3.332  | 5.933E-03 | 2.252E-02 | 2952495 | 2953331 | 837 +  |
| CDN75_RS06760 | nuoC | -0.246 | 10.980 | 5.983E-03 | 2.270E-02 | 1261000 | 1262802 | 1803 - |
| CDN75_RS06080 | rihB | -1.124 | 1.404  | 5.998E-03 | 2.273E-02 | 1113303 | 1114244 | 942 -  |
| CDN75_RS10600 | mdaB | -0.277 | 6.252  | 6.028E-03 | 2.283E-02 | 2024616 | 2025197 | 582 +  |
| CDN75_RS01260 | sapF | 0.316  | 5.756  | 6.087E-03 | 2.303E-02 | 208071  | 208877  | 807 -  |
| CDN75_RS01410 | NA   | -1.234 | 1.350  | 6.107E-03 | 2.308E-02 | 237064  | 238145  | 1082 + |
| CDN75_RS06515 | glpQ | -0.405 | 10.082 | 6.132E-03 | 2.316E-02 | 1208880 | 1209956 | 1077 - |
| CDN75_RS21160 | holA | 0.242  | 7.500  | 6.166E-03 | 2.327E-02 | 4062194 | 4063225 | 1032 - |
| CDN75_RS16460 | phnK | -0.770 | 2.984  | 6.202E-03 | 2.338E-02 | 3172653 | 3173411 | 759 -  |
| CDN75_RS22725 | ssuC | -1.369 | 1.760  | 6.226E-03 | 2.345E-02 | 4386999 | 4387790 | 792 -  |
| CDN75_RS18995 | fhuC | 0.330  | 6.316  | 6.240E-03 | 2.349E-02 | 3667626 | 3668423 | 798 +  |
| CDN75_RS03340 | mdtK | 0.309  | 6.776  | 6.289E-03 | 2.365E-02 | 600897  | 602270  | 1374 + |
| CDN75_RS01060 | yciE | -0.828 | 2.153  | 6.317E-03 | 2.374E-02 | 170961  | 171467  | 507 -  |
| CDN75_RS14530 | atpE | -0.255 | 9.731  | 6.354E-03 | 2.385E-02 | 2775711 | 2775950 | 240 -  |
| CDN75_RS22855 | sulA | 0.375  | 5.730  | 6.389E-03 | 2.396E-02 | 4413368 | 4413877 | 510 -  |
| CDN75_RS19370 | ivy  | -0.290 | 6.521  | 6.408E-03 | 2.401E-02 | 3738217 | 3738663 | 447 +  |
| CDN75_RS05705 | fbaB | -0.298 | 7.138  | 6.434E-03 | 2.409E-02 | 1036570 | 1037622 | 1053 - |
| CDN75_RS04840 | fliJ | 0.844  | 2.519  | 6.466E-03 | 2.419E-02 | 875809  | 876252  | 444 +  |
| CDN75_RS23160 | putA | -0.340 | 9.699  | 6.474E-03 | 2.420E-02 | 4467878 | 4471840 | 3963 - |
| CDN75_RS02640 | rspR | 0.272  | 6.197  | 6.481E-03 | 2.420E-02 | 485792  | 486478  | 687 +  |
| CDN75_RS03750 | osmE | 0.285  | 6.659  | 6.509E-03 | 2.429E-02 | 679358  | 679696  | 339 -  |
| CDN75_RS08035 | suhB | 0.279  | 7.244  | 6.522E-03 | 2.432E-02 | 1515596 | 1516399 | 804 +  |
| CDN75_RS14790 | wecC | 0.247  | 7.797  | 6.551E-03 | 2.440E-02 | 2826020 | 2827282 | 1263 + |
| CDN75_RS00615 | NA   | 0.311  | 5.865  | 6.557E-03 | 2.441E-02 | 95650   | 95781   | 132 -  |
| CDN75_RS17325 | rraB | 0.344  | 8.123  | 6.606E-03 | 2.457E-02 | 3333895 | 3334311 | 417 +  |
| CDN75_RS01530 | abgR | -0.537 | 3.696  | 6.654E-03 | 2.472E-02 | 262183  | 263091  | 909 +  |
| CDN75_RS10210 | hemW | 0.248  | 7.582  | 6.697E-03 | 2.486E-02 | 1949355 | 1950491 | 1137 + |
| CDN75_RS04785 | yedK | -0.726 | 2.503  | 6.755E-03 | 2.505E-02 | 867684  | 868352  | 669 +  |
| CDN75_RS17085 | ytfF | 0.350  | 5.208  | 6.764E-03 | 2.507E-02 | 3286737 | 3287702 | 966 -  |
| CDN75_RS15455 | sbp  | -0.350 | 5.967  | 6.805E-03 | 2.520E-02 | 2963593 | 2964582 | 990 +  |
| CDN75_RS11735 | zapE | 0.264  | 6.891  | 6.846E-03 | 2.533E-02 | 2232292 | 2233419 | 1128 - |
| CDN75_RS15840 | thiG | -0.417 | 4.151  | 6.860E-03 | 2.535E-02 | 3046624 | 3047394 | 771 -  |

|               |      |        |        |           |           |         |         |        |
|---------------|------|--------|--------|-----------|-----------|---------|---------|--------|
| CDN75_RS21380 | ybfE | 0.308  | 5.387  | 6.865E-03 | 2.535E-02 | 4103225 | 4103518 | 294 -  |
| CDN75_RS09640 | yqeH | -0.955 | 2.044  | 6.895E-03 | 2.545E-02 | 1839625 | 1840257 | 633 +  |
| CDN75_RS02095 | ydcT | -0.596 | 3.419  | 6.941E-03 | 2.559E-02 | 370259  | 371272  | 1014 + |
| CDN75_RS13990 | dut  | -0.258 | 7.658  | 6.956E-03 | 2.563E-02 | 2668689 | 2669147 | 459 +  |
| CDN75_RS16470 | phnI | -0.905 | 2.663  | 7.041E-03 | 2.591E-02 | 3174246 | 3175310 | 1065 - |
| CDN75_RS21610 | sucC | -0.273 | 11.981 | 7.045E-03 | 2.591E-02 | 4154634 | 4155800 | 1167 + |
| CDN75_RS03115 | ydgJ | 0.270  | 6.638  | 7.120E-03 | 2.615E-02 | 560708  | 561748  | 1041 - |
| CDN75_RS08295 | ung  | 0.284  | 6.095  | 7.123E-03 | 2.615E-02 | 1568908 | 1569597 | 690 +  |
| CDN75_RS04130 | yoaC | 0.524  | 3.353  | 7.159E-03 | 2.626E-02 | 751573  | 751872  | 300 +  |
| CDN75_RS14105 | nlpA | 0.378  | 4.830  | 7.170E-03 | 2.628E-02 | 2693936 | 2694754 | 819 -  |
| CDN75_RS08900 | srlA | 0.539  | 5.992  | 7.194E-03 | 2.635E-02 | 1677983 | 1678546 | 564 +  |
| CDN75_RS09610 | araE | 0.291  | 5.869  | 7.203E-03 | 2.636E-02 | 1832853 | 1834271 | 1419 - |
| CDN75_RS09290 | eno  | -0.237 | 10.702 | 7.215E-03 | 2.637E-02 | 1758732 | 1760030 | 1299 - |
| CDN75_RS19670 | NA   | -1.377 | 0.696  | 7.219E-03 | 2.637E-02 | 3783351 | 3783794 | 444 -  |
| CDN75_RS07385 | NA   | 1.324  | 0.259  | 7.228E-03 | 2.638E-02 | 1380304 | 1380429 | 126 +  |
| CDN75_RS03180 | dtpA | 0.264  | 8.597  | 7.316E-03 | 2.668E-02 | 570209  | 571711  | 1503 + |
| CDN75_RS04575 | motA | 0.646  | 3.245  | 7.365E-03 | 2.684E-02 | 834891  | 835778  | 888 -  |
| CDN75_RS01140 | yciN | 0.298  | 5.712  | 7.377E-03 | 2.686E-02 | 186660  | 186911  | 252 -  |
| CDN75_RS18720 | yacG | 0.325  | 5.340  | 7.397E-03 | 2.688E-02 | 3609497 | 3609694 | 198 -  |
| CDN75_RS11450 | greA | 0.269  | 6.877  | 7.397E-03 | 2.688E-02 | 2181661 | 2182137 | 477 -  |
| CDN75_RS07130 | yfdM | -1.438 | 0.681  | 7.404E-03 | 2.688E-02 | 1331066 | 1331332 | 267 -  |
| CDN75_RS06680 | yfbK | -0.649 | 2.962  | 7.406E-03 | 2.688E-02 | 1242940 | 1244667 | 1728 - |
| CDN75_RS07315 | ypeC | 0.371  | 4.510  | 7.456E-03 | 2.702E-02 | 1369946 | 1370272 | 327 +  |
| CDN75_RS01365 | ycjM | -0.811 | 2.533  | 7.460E-03 | 2.702E-02 | 226459  | 228138  | 1680 + |
| CDN75_RS21165 | lptE | 0.246  | 7.474  | 7.465E-03 | 2.702E-02 | 4063225 | 4063806 | 582 -  |
| CDN75_RS22950 | hyaF | -0.754 | 2.407  | 7.520E-03 | 2.720E-02 | 4429707 | 4430564 | 858 +  |
| CDN75_RS07860 | ppkI | 0.239  | 8.700  | 7.550E-03 | 2.728E-02 | 1475198 | 1477264 | 2067 + |
| CDN75_RS07730 | bamC | 0.232  | 9.570  | 7.618E-03 | 2.751E-02 | 1449985 | 1451019 | 1035 - |
| CDN75_RS12045 | trkA | 0.259  | 7.191  | 7.734E-03 | 2.790E-02 | 2289940 | 2291316 | 1377 + |
| CDN75_RS09905 | sdhE | 0.376  | 5.925  | 7.741E-03 | 2.791E-02 | 1892893 | 1893159 | 267 -  |
| CDN75_RS19565 | NA   | -1.139 | 0.847  | 7.755E-03 | 2.793E-02 | 3766514 | 3766714 | 201 -  |
| CDN75_RS01095 | trpE | 0.560  | 3.906  | 7.931E-03 | 2.854E-02 | 177627  | 179189  | 1563 - |
| CDN75_RS02690 | ynfO | -1.144 | 1.094  | 8.015E-03 | 2.882E-02 | 494196  | 494429  | 234 +  |
| CDN75_RS19210 | arfB | 0.364  | 5.162  | 8.060E-03 | 2.894E-02 | 3712680 | 3713102 | 423 +  |
| CDN75_RS07910 | xseA | 0.264  | 7.663  | 8.060E-03 | 2.894E-02 | 1486386 | 1487756 | 1371 + |
| CDN75_RS23650 | ycfH | 0.242  | 6.958  | 8.082E-03 | 2.899E-02 | 4551114 | 4551911 | 798 +  |
| CDN75_RS08100 | yphD | -0.622 | 2.885  | 8.103E-03 | 2.904E-02 | 1527981 | 1528979 | 999 -  |
| CDN75_RS16590 | fumB | -0.376 | 5.088  | 8.113E-03 | 2.905E-02 | 3200327 | 3201973 | 1647 - |
| CDN75_RS11670 | nanQ | -0.409 | 4.544  | 8.198E-03 | 2.933E-02 | 2222436 | 2222900 | 465 -  |
| CDN75_RS20885 | entS | 0.331  | 6.234  | 8.290E-03 | 2.964E-02 | 4013920 | 4015170 | 1251 + |
| CDN75_RS24525 | NA   | -1.133 | 1.526  | 8.373E-03 | 2.991E-02 | 2622685 | 2623206 | 522 +  |
| CDN75_RS09895 | fldB | 0.259  | 6.982  | 8.414E-03 | 3.003E-02 | 1891944 | 1892465 | 522 +  |
| CDN75_RS17220 | yjgA | 0.257  | 7.033  | 8.465E-03 | 3.019E-02 | 3312736 | 3313287 | 552 -  |
| CDN75_RS03260 | nemR | -0.419 | 4.127  | 8.472E-03 | 3.019E-02 | 583463  | 584062  | 600 +  |
| CDN75_RS22605 | rpsA | -0.248 | 12.539 | 8.535E-03 | 3.037E-02 | 4354953 | 4356626 | 1674 + |
| CDN75_RS24140 | NA   | -0.534 | 3.938  | 8.537E-03 | 3.037E-02 | 2620632 | 2621588 | 957 +  |
| CDN75_RS08925 | srlR | -0.323 | 5.485  | 8.556E-03 | 3.041E-02 | 1681198 | 1681971 | 774 +  |
| CDN75_RS06830 | yfcD | -0.252 | 6.827  | 8.565E-03 | 3.041E-02 | 1277579 | 1278121 | 543 -  |
| CDN75_RS04305 | pphA | 0.381  | 4.406  | 8.570E-03 | 3.041E-02 | 780952  | 781608  | 657 -  |
| CDN75_RS23630 | pabC | 0.309  | 5.399  | 8.620E-03 | 3.057E-02 | 4547637 | 4548446 | 810 +  |
| CDN75_RS18195 | yjjY | 0.364  | 7.263  | 8.639E-03 | 3.059E-02 | 3496600 | 3496740 | 141 +  |
| CDN75_RS14660 | maoP | -0.310 | 5.811  | 8.641E-03 | 3.059E-02 | 2802846 | 2803184 | 339 +  |
| CDN75_RS14870 | hemY | 0.230  | 8.398  | 8.666E-03 | 3.066E-02 | 2841445 | 2842641 | 1197 - |
| CDN75_RS12385 | yheU | 0.441  | 3.989  | 8.751E-03 | 3.093E-02 | 2337640 | 2337858 | 219 +  |
| CDN75_RS16330 | nrfE | -0.777 | 3.446  | 8.777E-03 | 3.100E-02 | 3146211 | 3147928 | 1718 + |
| CDN75_RS21630 | mngB | -0.343 | 4.811  | 8.795E-03 | 3.104E-02 | 4159598 | 4162231 | 2634 + |
| CDN75_RS15345 | fdhD | 0.290  | 6.002  | 8.832E-03 | 3.114E-02 | 2940775 | 2941608 | 834 +  |
| CDN75_RS02155 | mcbR | 0.471  | 3.551  | 8.881E-03 | 3.129E-02 | 377704  | 378369  | 666 +  |
| CDN75_RS12360 | kefB | 0.299  | 6.526  | 8.927E-03 | 3.138E-02 | 2332224 | 2334029 | 1806 - |

|               |       |        |        |           |           |         |         |        |
|---------------|-------|--------|--------|-----------|-----------|---------|---------|--------|
| CDN75_RS21040 | citC  | -0.788 | 2.429  | 8.927E-03 | 3.138E-02 | 4042418 | 4043476 | 1059 - |
| CDN75_RS06285 | ccmE  | -0.513 | 3.510  | 8.929E-03 | 3.138E-02 | 1153959 | 1154438 | 480 -  |
| CDN75_RS13575 | xylR  | 0.285  | 5.635  | 8.959E-03 | 3.146E-02 | 2588402 | 2589580 | 1179 + |
| CDN75_RS04680 | pgsA  | 0.261  | 6.534  | 8.972E-03 | 3.146E-02 | 850132  | 850680  | 549 -  |
| CDN75_RS13380 | bcsF  | 0.640  | 3.266  | 8.973E-03 | 3.146E-02 | 2551449 | 2551640 | 192 +  |
| CDN75_RS21950 | ybhP  | 0.369  | 4.394  | 8.983E-03 | 3.147E-02 | 4215356 | 4216117 | 762 -  |
| CDN75_RS10220 | ansB  | 0.439  | 4.212  | 9.000E-03 | 3.150E-02 | 1951770 | 1952816 | 1047 - |
| CDN75_RS01195 | lapA  | 0.277  | 5.845  | 9.016E-03 | 3.153E-02 | 196486  | 196794  | 309 +  |
| CDN75_RS14440 | yieL  | -0.673 | 3.339  | 9.146E-03 | 3.196E-02 | 2754169 | 2755338 | 1170 - |
| CDN75_RS16480 | phnG  | -0.931 | 1.797  | 9.159E-03 | 3.198E-02 | 3175891 | 3176343 | 453 -  |
| CDN75_RS13610 | yiaL  | -1.234 | 1.018  | 9.219E-03 | 3.217E-02 | 2597166 | 2597633 | 468 +  |
| CDN75_RS09395 | fucA  | -0.676 | 2.922  | 9.270E-03 | 3.232E-02 | 1785130 | 1785777 | 648 -  |
| CDN75_RS13320 | kdgK  | -0.247 | 10.350 | 9.286E-03 | 3.234E-02 | 2532842 | 2533771 | 930 +  |
| CDN75_RS20195 | pdeB  | 0.260  | 6.637  | 9.298E-03 | 3.234E-02 | 3878851 | 3880401 | 1551 - |
| CDN75_RS09265 | yqcE  | -0.606 | 3.067  | 9.298E-03 | 3.234E-02 | 1752742 | 1754019 | 1278 + |
| CDN75_RS16285 | espX5 | -1.433 | 0.941  | 9.308E-03 | 3.235E-02 | 3136542 | 3137834 | 1293 - |
| CDN75_RS22265 | grxA  | 0.721  | 2.252  | 9.320E-03 | 3.236E-02 | 4282116 | 4282373 | 258 -  |
| CDN75_RS03410 | lpp   | 0.307  | 9.694  | 9.419E-03 | 3.268E-02 | 614861  | 615097  | 237 +  |
| CDN75_RS16850 | nnr   | -0.241 | 6.866  | 9.492E-03 | 3.291E-02 | 3248712 | 3250259 | 1548 + |
| CDN75_RS18175 | creB  | -0.276 | 5.971  | 9.531E-03 | 3.299E-02 | 3492205 | 3492894 | 690 +  |
| CDN75_RS08805 | ygaH  | 0.261  | 6.601  | 9.531E-03 | 3.299E-02 | 1662496 | 1662831 | 336 +  |
| CDN75_RS22975 | etk   | -0.289 | 5.472  | 9.557E-03 | 3.305E-02 | 4434988 | 4437168 | 2181 - |
| CDN75_RS03170 | nth   | 0.279  | 5.626  | 9.564E-03 | 3.305E-02 | 568963  | 569598  | 636 +  |
| CDN75_RS18420 | fixX  | -1.207 | 0.678  | 9.573E-03 | 3.306E-02 | 3543313 | 3543600 | 288 +  |
| CDN75_RS15045 | tatA  | 0.261  | 6.941  | 9.582E-03 | 3.306E-02 | 2876704 | 2876973 | 270 +  |
| CDN75_RS22330 | artM  | -0.259 | 6.853  | 9.592E-03 | 3.307E-02 | 4292486 | 4293154 | 669 -  |
| CDN75_RS05085 | ldtA  | 0.299  | 5.861  | 9.652E-03 | 3.325E-02 | 920254  | 921189  | 936 -  |
| CDN75_RS01190 | pgpB  | 0.309  | 5.328  | 9.658E-03 | 3.325E-02 | 195573  | 196337  | 765 +  |
| CDN75_RS00475 | lolB  | 0.262  | 6.601  | 9.728E-03 | 3.346E-02 | 71165   | 71788   | 624 -  |
| CDN75_RS04395 | mepM  | 0.249  | 7.168  | 9.742E-03 | 3.348E-02 | 798952  | 800274  | 1323 - |
| CDN75_RS03490 | ydiN  | -1.075 | 1.622  | 9.767E-03 | 3.354E-02 | 629952  | 631217  | 1266 + |
| CDN75_RS22420 | macA  | 0.299  | 5.682  | 9.776E-03 | 3.354E-02 | 4310855 | 4311970 | 1116 + |
| CDN75_RS23150 | rutA  | -0.928 | 2.174  | 9.861E-03 | 3.381E-02 | 4465821 | 4466912 | 1092 - |
| CDN75_RS20540 | ybcF  | -0.362 | 5.341  | 9.884E-03 | 3.385E-02 | 3952223 | 3953116 | 894 +  |
| CDN75_RS21990 | ybiA  | 0.530  | 3.423  | 9.888E-03 | 3.385E-02 | 4224088 | 4224570 | 483 -  |
| CDN75_RS00170 | ycgX  | 0.664  | 2.857  | 9.897E-03 | 3.385E-02 | 20991   | 21395   | 405 -  |
| CDN75_RS21705 | NA    | -0.328 | 7.951  | 1.007E-02 | 3.441E-02 | 4172463 | 4172538 | 76 +   |
| CDN75_RS08270 | trmN  | 0.316  | 5.078  | 1.009E-02 | 3.446E-02 | 1564181 | 1564918 | 738 -  |
| CDN75_RS17420 | NA    | 0.331  | 6.796  | 1.019E-02 | 3.476E-02 | 3355015 | 3356198 | 1184 - |
| CDN75_RS13645 | araD  | -0.545 | 3.380  | 1.026E-02 | 3.498E-02 | 2603509 | 2604204 | 696 +  |
| CDN75_RS19705 | tauA  | -0.701 | 2.493  | 1.027E-02 | 3.499E-02 | 3787739 | 3788701 | 963 +  |
| CDN75_RS20795 | ybdG  | 0.240  | 6.666  | 1.030E-02 | 3.504E-02 | 3995036 | 3996283 | 1248 - |
| CDN75_RS16935 | yjfK  | -0.930 | 1.700  | 1.030E-02 | 3.504E-02 | 3265948 | 3266607 | 660 +  |
| CDN75_RS14515 | atpA  | -0.249 | 12.634 | 1.036E-02 | 3.520E-02 | 2773077 | 2774618 | 1542 - |
| CDN75_RS03955 | yeaC  | -0.286 | 5.849  | 1.037E-02 | 3.521E-02 | 719142  | 719414  | 273 -  |
| CDN75_RS17145 | msrA  | 0.249  | 6.680  | 1.038E-02 | 3.521E-02 | 3296960 | 3297598 | 639 -  |
| CDN75_RS14525 | atpF  | -0.248 | 11.100 | 1.042E-02 | 3.534E-02 | 2775179 | 2775649 | 471 -  |
| CDN75_RS11195 | kbaZ  | -0.466 | 3.814  | 1.043E-02 | 3.534E-02 | 2132337 | 2133617 | 1281 + |
| CDN75_RS06475 | ubiG  | 0.240  | 7.046  | 1.048E-02 | 3.549E-02 | 1198512 | 1199234 | 723 +  |
| CDN75_RS22710 | pncB  | 0.239  | 8.421  | 1.050E-02 | 3.552E-02 | 4382112 | 4383314 | 1203 - |
| CDN75_RS02900 | ynfC  | 0.304  | 5.059  | 1.054E-02 | 3.562E-02 | 514187  | 514897  | 711 -  |
| CDN75_RS09980 | ssrS  | 0.285  | 7.532  | 1.056E-02 | 3.568E-02 | 1908071 | 1908254 | 184 +  |
| CDN75_RS16370 | mdtO  | -0.468 | 4.077  | 1.057E-02 | 3.568E-02 | 3155674 | 3157725 | 2052 - |
| CDN75_RS10560 | mqsR  | -0.415 | 4.034  | 1.069E-02 | 3.604E-02 | 2020334 | 2020630 | 297 -  |
| CDN75_RS15385 | rhaA  | -0.667 | 3.265  | 1.072E-02 | 3.614E-02 | 2949482 | 2950741 | 1260 - |
| CDN75_RS02265 | NA    | -1.181 | 1.436  | 1.081E-02 | 3.640E-02 | 401826  | 403156  | 1331 - |
| CDN75_RS12670 | yhgF  | -0.232 | 8.851  | 1.083E-02 | 3.643E-02 | 2390807 | 2393128 | 2322 + |
| CDN75_RS04035 | yoaF  | 0.552  | 3.174  | 1.086E-02 | 3.651E-02 | 734718  | 734972  | 255 -  |
| CDN75_RS11015 | yqjC  | 0.251  | 7.938  | 1.093E-02 | 3.671E-02 | 2102392 | 2102760 | 369 +  |

|               |      |        |        |           |           |         |         |        |
|---------------|------|--------|--------|-----------|-----------|---------|---------|--------|
| CDN75_RS22575 | ycaO | 0.261  | 7.427  | 1.098E-02 | 3.681E-02 | 4347830 | 4349590 | 1761 - |
| CDN75_RS06870 | hisM | 0.313  | 5.094  | 1.098E-02 | 3.681E-02 | 1283462 | 1284178 | 717 -  |
| CDN75_RS09340 | gudP | -0.764 | 3.376  | 1.098E-02 | 3.681E-02 | 1772837 | 1774189 | 1353 - |
| CDN75_RS05790 | apbC | 0.235  | 8.596  | 1.099E-02 | 3.681E-02 | 1052117 | 1053226 | 1110 - |
| CDN75_RS18670 | murG | 0.227  | 7.836  | 1.104E-02 | 3.696E-02 | 3597492 | 3598559 | 1068 + |
| CDN75_RS03640 | thrS | 0.220  | 11.200 | 1.106E-02 | 3.698E-02 | 658082  | 660010  | 1929 - |
| CDN75_RS22890 | yccU | 0.334  | 4.845  | 1.108E-02 | 3.704E-02 | 4420904 | 4421317 | 414 +  |
| CDN75_RS13305 | yhjG | 0.265  | 6.519  | 1.110E-02 | 3.705E-02 | 2529713 | 2531773 | 2061 - |
| CDN75_RS14420 | yieH | 0.309  | 5.352  | 1.110E-02 | 3.705E-02 | 2751535 | 2752200 | 666 +  |
| CDN75_RS14140 | adeD | -0.323 | 6.080  | 1.112E-02 | 3.708E-02 | 2698725 | 2700491 | 1767 + |
| CDN75_RS02090 | ydcS | -0.419 | 3.902  | 1.118E-02 | 3.725E-02 | 369096  | 370241  | 1146 + |
| CDN75_RS16135 | plsB | -0.248 | 8.909  | 1.119E-02 | 3.726E-02 | 3108802 | 3111225 | 2424 - |
| CDN75_RS04715 | dcyD | 0.276  | 5.959  | 1.128E-02 | 3.753E-02 | 856357  | 857343  | 987 -  |
| CDN75_RS06205 | radD | 0.276  | 6.350  | 1.131E-02 | 3.759E-02 | 1139690 | 1141450 | 1761 + |
| CDN75_RS20180 | NA   | 0.329  | 4.895  | 1.132E-02 | 3.759E-02 | 3877766 | 3878077 | 312 -  |
| CDN75_RS15880 | nfi  | 0.249  | 7.235  | 1.133E-02 | 3.761E-02 | 3053549 | 3054220 | 672 +  |
| CDN75_RS10765 | ygIF | -0.268 | 6.003  | 1.135E-02 | 3.763E-02 | 2053088 | 2054389 | 1302 - |
| CDN75_RS19105 | pyrH | -0.222 | 8.699  | 1.137E-02 | 3.766E-02 | 3689703 | 3690428 | 726 +  |
| CDN75_RS07640 | eutP | -0.998 | 1.409  | 1.137E-02 | 3.766E-02 | 1427133 | 1427612 | 480 -  |
| CDN75_RS00505 | kdsA | 0.236  | 8.294  | 1.139E-02 | 3.768E-02 | 76452   | 77306   | 855 +  |
| CDN75_RS23980 | NA   | 0.250  | 8.158  | 1.150E-02 | 3.803E-02 | 107690  | 107986  | 297 -  |
| CDN75_RS20020 | yajL | 0.260  | 6.047  | 1.154E-02 | 3.814E-02 | 3844835 | 3845425 | 591 -  |
| CDN75_RS15390 | rhaB | -0.627 | 3.194  | 1.161E-02 | 3.831E-02 | 2950738 | 2952207 | 1470 - |
| CDN75_RS11895 | yhdJ | -0.686 | 2.898  | 1.161E-02 | 3.831E-02 | 2265075 | 2265959 | 885 +  |
| CDN75_RS18330 | lspA | 0.249  | 8.033  | 1.167E-02 | 3.846E-02 | 3523057 | 3523551 | 495 +  |
| CDN75_RS20065 | ampG | 0.237  | 7.059  | 1.169E-02 | 3.851E-02 | 3853854 | 3855329 | 1476 - |
| CDN75_RS02110 | patD | -0.367 | 4.390  | 1.183E-02 | 3.894E-02 | 373020  | 374444  | 1425 + |
| CDN75_RS15970 | aceB | -0.281 | 6.815  | 1.187E-02 | 3.903E-02 | 3070237 | 3071838 | 1602 + |
| CDN75_RS11920 | acrF | -0.340 | 5.389  | 1.189E-02 | 3.906E-02 | 2268455 | 2271559 | 3105 + |
| CDN75_RS12325 | tusC | 0.272  | 5.782  | 1.197E-02 | 3.932E-02 | 2328395 | 2328754 | 360 -  |
| CDN75_RS15615 | frwB | -0.906 | 2.038  | 1.207E-02 | 3.961E-02 | 2998383 | 2998703 | 321 +  |
| CDN75_RS00795 | NA   | -1.266 | 0.400  | 1.209E-02 | 3.963E-02 | 125945  | 126154  | 210 -  |
| CDN75_RS16000 | yjbB | 0.269  | 6.529  | 1.210E-02 | 3.965E-02 | 3082490 | 3084121 | 1632 + |
| CDN75_RS01785 | ydbL | 0.548  | 3.650  | 1.222E-02 | 4.000E-02 | 303322  | 303648  | 327 +  |
| CDN75_RS18715 | mutT | 0.422  | 4.175  | 1.227E-02 | 4.013E-02 | 3608892 | 3609281 | 390 +  |
| CDN75_RS24480 | cynS | -1.226 | 0.435  | 1.228E-02 | 4.013E-02 | 147072  | 147542  | 471 +  |
| CDN75_RS15425 | yiiM | -0.243 | 6.937  | 1.238E-02 | 4.041E-02 | 2957581 | 2958255 | 675 +  |
| CDN75_RS09275 | queE | 0.308  | 5.427  | 1.238E-02 | 4.041E-02 | 1756836 | 1757507 | 672 -  |
| CDN75_RS02510 | lsrF | -0.708 | 2.660  | 1.240E-02 | 4.044E-02 | 463540  | 464415  | 876 +  |
| CDN75_RS03280 | lhr  | 0.226  | 6.975  | 1.266E-02 | 4.126E-02 | 586527  | 591143  | 4617 + |
| CDN75_RS14895 | cyaA | 0.215  | 10.676 | 1.271E-02 | 4.138E-02 | 2845912 | 2848458 | 2547 + |
| CDN75_RS15715 | NA   | -1.385 | -0.044 | 1.287E-02 | 4.189E-02 | 3021418 | 3022959 | 1542 + |
| CDN75_RS08720 | yqaE | 0.680  | 2.337  | 1.293E-02 | 4.202E-02 | 1649022 | 1649180 | 159 -  |
| CDN75_RS19860 | NA   | 0.614  | 2.671  | 1.293E-02 | 4.202E-02 | 3810393 | 3810734 | 342 +  |
| CDN75_RS08390 | raiA | 0.252  | 8.831  | 1.297E-02 | 4.210E-02 | 1589308 | 1589649 | 342 +  |
| CDN75_RS16830 | NA   | 0.309  | 5.021  | 1.300E-02 | 4.217E-02 | 3247118 | 3247193 | 76 +   |
| CDN75_RS24500 | NA   | -0.847 | 1.504  | 1.302E-02 | 4.222E-02 | 923779  | 923922  | 144 -  |
| CDN75_RS09670 | ygeG | -1.175 | 0.672  | 1.312E-02 | 4.247E-02 | 1843357 | 1843848 | 492 +  |
| CDN75_RS20595 | fimC | -0.893 | 1.488  | 1.312E-02 | 4.247E-02 | 3960758 | 3961450 | 693 +  |
| CDN75_RS01170 | yciX | 0.445  | 3.667  | 1.313E-02 | 4.247E-02 | 191534  | 191701  | 168 +  |
| CDN75_RS17465 | nanY | -0.296 | 5.012  | 1.316E-02 | 4.251E-02 | 3360709 | 3361827 | 1119 + |
| CDN75_RS20600 | sfmD | -0.692 | 3.473  | 1.316E-02 | 4.251E-02 | 3961481 | 3964084 | 2604 + |
| CDN75_RS03445 | sufA | -0.317 | 5.417  | 1.319E-02 | 4.257E-02 | 621458  | 621826  | 369 -  |
| CDN75_RS20580 | ybcJ | 0.329  | 4.864  | 1.323E-02 | 4.269E-02 | 3958445 | 3958657 | 213 -  |
| CDN75_RS19880 | sbcC | -0.249 | 6.858  | 1.337E-02 | 4.310E-02 | 3814391 | 3817537 | 3147 - |
| CDN75_RS18815 | acnB | -0.255 | 12.216 | 1.344E-02 | 4.326E-02 | 3629463 | 3632060 | 2598 + |
| CDN75_RS22990 | gfcD | -0.351 | 4.696  | 1.344E-02 | 4.326E-02 | 4438807 | 4440903 | 2097 - |
| CDN75_RS05535 | alkA | 0.398  | 4.771  | 1.347E-02 | 4.332E-02 | 1004553 | 1005401 | 849 -  |
| CDN75_RS12275 | gspO | -0.319 | 5.159  | 1.351E-02 | 4.341E-02 | 2318965 | 2319642 | 678 +  |

|               |        |        |        |           |           |         |         |        |
|---------------|--------|--------|--------|-----------|-----------|---------|---------|--------|
| CDN75_RS08125 | glyA   | -0.268 | 12.233 | 1.355E-02 | 4.350E-02 | 1536408 | 1537661 | 1254 - |
| CDN75_RS18955 | gluQRS | -0.288 | 5.474  | 1.360E-02 | 4.364E-02 | 3657034 | 3657930 | 897 -  |
| CDN75_RS08985 | hycG   | -0.546 | 3.123  | 1.363E-02 | 4.370E-02 | 1695594 | 1696361 | 768 -  |
| CDN75_RS16845 | queG   | 0.242  | 7.018  | 1.372E-02 | 4.395E-02 | 3247574 | 3248713 | 1140 - |
| CDN75_RS17190 | ytfR   | -0.344 | 4.889  | 1.375E-02 | 4.403E-02 | 3306480 | 3307982 | 1503 + |
| CDN75_RS15355 | frvR   | -0.565 | 3.611  | 1.381E-02 | 4.420E-02 | 2942866 | 2944614 | 1749 - |
| CDN75_RS04625 | ftnB   | 0.338  | 4.701  | 1.384E-02 | 4.425E-02 | 844788  | 845291  | 504 +  |
| CDN75_RS17015 | ulaF   | -0.445 | 3.863  | 1.386E-02 | 4.428E-02 | 3278346 | 3279032 | 687 +  |
| CDN75_RS13960 | coaD   | -0.339 | 5.205  | 1.389E-02 | 4.432E-02 | 2664585 | 2665064 | 480 +  |
| CDN75_RS11465 | yhbE   | 0.240  | 7.410  | 1.389E-02 | 4.432E-02 | 2185192 | 2186157 | 966 -  |
| CDN75_RS17275 | pyrI   | -0.316 | 4.729  | 1.392E-02 | 4.437E-02 | 3326408 | 3326869 | 462 -  |
| CDN75_RS02435 | ydeR   | -0.962 | 1.328  | 1.398E-02 | 4.453E-02 | 445235  | 445738  | 504 -  |
| CDN75_RS12000 | yrdB   | 0.337  | 4.956  | 1.401E-02 | 4.457E-02 | 2283188 | 2283445 | 258 -  |
| CDN75_RS14055 | recG   | -0.220 | 8.074  | 1.401E-02 | 4.457E-02 | 2679971 | 2682052 | 2082 + |
| CDN75_RS20505 | glxK   | -0.987 | 2.777  | 1.404E-02 | 4.464E-02 | 3943672 | 3944817 | 1146 + |
| CDN75_RS18655 | mraY   | 0.215  | 7.554  | 1.408E-02 | 4.471E-02 | 3593850 | 3594932 | 1083 + |
| CDN75_RS09445 | csdA   | 0.222  | 7.477  | 1.413E-02 | 4.484E-02 | 1795426 | 1796631 | 1206 + |
| CDN75_RS21350 | glnS   | 0.225  | 9.514  | 1.419E-02 | 4.499E-02 | 4097713 | 4099377 | 1665 + |
| CDN75_RS12580 | hofQ   | -0.651 | 3.511  | 1.435E-02 | 4.543E-02 | 2372887 | 2374125 | 1239 - |
| CDN75_RS13855 | tdh    | -0.229 | 9.367  | 1.435E-02 | 4.543E-02 | 2643743 | 2644768 | 1026 - |
| CDN75_RS16835 | NA     | 0.498  | 3.320  | 1.436E-02 | 4.543E-02 | 3247229 | 3247304 | 76 +   |
| CDN75_RS14775 | wecA   | 0.225  | 7.798  | 1.439E-02 | 4.550E-02 | 2822676 | 2823779 | 1104 + |
| CDN75_RS16205 | yjbS   | -1.205 | 0.422  | 1.442E-02 | 4.558E-02 | 3123568 | 3123771 | 204 -  |
| CDN75_RS09780 | hyuA   | -0.505 | 3.465  | 1.446E-02 | 4.565E-02 | 1862117 | 1863502 | 1386 + |
| CDN75_RS05425 | wzxC   | -0.629 | 3.219  | 1.447E-02 | 4.565E-02 | 976542  | 978020  | 1479 - |
| CDN75_RS12630 | hslO   | -0.248 | 8.052  | 1.456E-02 | 4.590E-02 | 2383196 | 2384074 | 879 +  |
| CDN75_RS20425 | rhsD   | -0.382 | 5.354  | 1.457E-02 | 4.591E-02 | 3925045 | 3929325 | 4281 + |
| CDN75_RS19940 | secF   | 0.228  | 8.312  | 1.465E-02 | 4.610E-02 | 3831289 | 3832260 | 972 +  |
| CDN75_RS21265 | ybeZ   | -0.238 | 8.501  | 1.466E-02 | 4.610E-02 | 4083958 | 4084998 | 1041 - |
| CDN75_RS02680 | nohA   | -1.011 | 1.751  | 1.466E-02 | 4.610E-02 | 493238  | 493807  | 570 -  |
| CDN75_RS10905 | ebgA   | -0.390 | 5.015  | 1.487E-02 | 4.668E-02 | 2076056 | 2079148 | 3093 + |
| CDN75_RS18930 | htrE   | -0.756 | 2.799  | 1.487E-02 | 4.668E-02 | 3650677 | 3653274 | 2598 - |
| CDN75_RS01400 | ycjT   | -0.512 | 3.427  | 1.494E-02 | 4.685E-02 | 234127  | 236394  | 2268 + |
| CDN75_RS16275 | ghxP   | -0.232 | 9.105  | 1.499E-02 | 4.698E-02 | 3133238 | 3134587 | 1350 + |
| CDN75_RS00925 | NA     | -0.665 | 3.030  | 1.504E-02 | 4.710E-02 | 140664  | 142586  | 1923 + |
| CDN75_RS13875 | rfaF   | 0.214  | 8.174  | 1.508E-02 | 4.720E-02 | 2648352 | 2649398 | 1047 + |
| CDN75_RS21495 | ybfD   | -1.172 | 1.365  | 1.511E-02 | 4.725E-02 | 4129712 | 4130470 | 759 +  |
| CDN75_RS07920 | der    | 0.224  | 8.400  | 1.512E-02 | 4.727E-02 | 1488038 | 1489510 | 1473 - |
| CDN75_RS20855 | ybdZ   | 0.542  | 4.066  | 1.517E-02 | 4.736E-02 | 4005562 | 4005780 | 219 +  |
| CDN75_RS14655 | hdfR   | 0.238  | 6.404  | 1.517E-02 | 4.736E-02 | 2801888 | 2802727 | 840 -  |
| CDN75_RS15620 | pflD   | -0.333 | 4.877  | 1.523E-02 | 4.748E-02 | 2998754 | 3001051 | 2298 + |
| CDN75_RS20550 | purE   | -0.285 | 8.187  | 1.523E-02 | 4.748E-02 | 3954375 | 3954884 | 510 -  |
| CDN75_RS01010 | NA     | -0.275 | 5.501  | 1.526E-02 | 4.752E-02 | 159942  | 162038  | 2097 - |
| CDN75_RS08185 | yfhL   | 0.672  | 2.407  | 1.532E-02 | 4.767E-02 | 1551817 | 1552077 | 261 +  |
| CDN75_RS21645 | cydB   | 0.227  | 8.793  | 1.536E-02 | 4.778E-02 | 4164662 | 4165801 | 1140 + |
| CDN75_RS09440 | ygdI   | 0.419  | 3.998  | 1.541E-02 | 4.788E-02 | 1795007 | 1795234 | 228 -  |
| CDN75_RS06110 | fruK   | -0.378 | 4.899  | 1.542E-02 | 4.788E-02 | 1120485 | 1121423 | 939 -  |
| CDN75_RS16080 | malF   | -0.338 | 7.110  | 1.545E-02 | 4.794E-02 | 3098290 | 3099834 | 1545 - |
| CDN75_RS23070 | torA   | -0.433 | 3.931  | 1.549E-02 | 4.803E-02 | 4452214 | 4454760 | 2547 + |
| CDN75_RS09620 | kduD   | 0.231  | 10.405 | 1.560E-02 | 4.830E-02 | 1834586 | 1835347 | 762 -  |
| CDN75_RS02130 | ydcY   | 0.335  | 4.622  | 1.561E-02 | 4.830E-02 | 375090  | 375323  | 234 +  |
| CDN75_RS01165 | ymiA   | 0.644  | 2.819  | 1.561E-02 | 4.830E-02 | 191391  | 191531  | 141 +  |
| CDN75_RS16870 | miaA   | 0.221  | 9.655  | 1.562E-02 | 4.830E-02 | 3253898 | 3254848 | 951 +  |
| CDN75_RS21125 | rlpA   | 0.220  | 8.311  | 1.566E-02 | 4.839E-02 | 4055722 | 4056810 | 1089 - |
| CDN75_RS22195 | rimO   | -0.267 | 6.153  | 1.572E-02 | 4.855E-02 | 4268330 | 4269655 | 1326 - |
| CDN75_RS12330 | tusD   | 0.241  | 6.239  | 1.586E-02 | 4.894E-02 | 2328754 | 2329140 | 387 -  |
| CDN75_RS08155 | purL   | -0.257 | 11.540 | 1.588E-02 | 4.896E-02 | 1543810 | 1547697 | 3888 - |
| CDN75_RS22075 | dps    | 0.234  | 9.274  | 1.589E-02 | 4.896E-02 | 4240028 | 4240531 | 504 -  |
| CDN75_RS13670 | yiaV   | -0.753 | 3.154  | 1.591E-02 | 4.898E-02 | 2606386 | 2607522 | 1137 - |

|               |      |        |       |           |           |         |         |        |
|---------------|------|--------|-------|-----------|-----------|---------|---------|--------|
| CDN75_RS15770 | NA   | -0.323 | 5.551 | 1.595E-02 | 4.904E-02 | 3030432 | 3030506 | 75 +   |
| CDN75_RS20780 | cusB | -0.652 | 2.445 | 1.595E-02 | 4.904E-02 | 3989099 | 3990322 | 1224 + |
| CDN75_RS12245 | gspH | -0.820 | 2.442 | 1.598E-02 | 4.909E-02 | 2314890 | 2315399 | 510 +  |
| CDN75_RS18145 | sltY | 0.215  | 7.506 | 1.602E-02 | 4.919E-02 | 3486931 | 3488868 | 1938 + |
| CDN75_RS17885 | NA   | -0.251 | 6.161 | 1.605E-02 | 4.925E-02 | 3430117 | 3432264 | 2148 + |
| CDN75_RS09330 | gudD | -0.474 | 4.235 | 1.611E-02 | 4.941E-02 | 1770134 | 1771474 | 1341 - |
| CDN75_RS00550 | ychO | 0.298  | 5.162 | 1.631E-02 | 4.998E-02 | 82071   | 83465   | 1395 + |

**Table S3 List of genes significantly upregulated in static culture (S<T)**

Genes with  $|\log_{2}FC| > 1$  and a significantly low FDR (FDR < 0.05) were annotated. Genes identified as characteristic of the culture are highlighted or marked (see Table 1).

| gene | log <sub>2</sub> FC | size (a.a) | Description: <i>Escherichia coli</i> K-12 substr. MG1655 reference genome (EcoCyc)                             | UniProt Entry |
|------|---------------------|------------|----------------------------------------------------------------------------------------------------------------|---------------|
| ynfR | 2.369               | 21         | Qin prophage; protein YnfR                                                                                     | P0DPO9        |
| NA   | 2.332               |            |                                                                                                                |               |
| fimA | 2.193               | 184        | type 1 fimbriae major subunit (fimD; pilA)                                                                     | Q47223        |
| ynfN | 2.162               | 51         | Qin prophage; protein YnfN                                                                                     | P76157        |
| bluF | 2.060               | 403        | blue light- and temperature-regulated antirepressor BluF (ycgF; Blrp; blue light-responsive regulator of BluR) | P75990        |
| ymcE | 2.032               | 76         | protein YmcE                                                                                                   | P0AAA5        |
| pinR | 1.896               | 196        | Rac prophage; putative site-specific recombinase (ynaD)                                                        | P0ADI0        |
| mgtS | 1.852               | 31         | small protein MgtS (yneM)                                                                                      | A5A616        |
| ymiC | 1.847               | 31         | protein YmiC                                                                                                   | P0DPO1        |
| leuB | 1.842               | 363        | 3-isopropylmalate dehydrogenase (IPMDH)                                                                        | P30125        |
| ynfQ | 1.822               | 62         | Qin prophage; protein YnfQ                                                                                     | P0DPO8        |
| NA   | 1.811               |            |                                                                                                                |               |
| yecV | 1.746               | 14         | protein YecV                                                                                                   | P0DSF6        |
| leuC | 1.743               | 466        | 3-isopropylmalate dehydratase subunit LeuC (3-isopropylmalate dehydratase, large subunit)                      | P0A6A6        |
| cspI | 1.732               | 70         | Qin prophage; cold shock-like protein CspI (cspJ)                                                              | P0A986        |
| fimI | 1.679               | 179        | putative fimbrial protein FimI                                                                                 | P39264        |
| pinQ | 1.632               | 196        | Qin prophage; putative recombinase PinQ (ydfL)                                                                 | P77170        |
| ynfU | 1.575               | 56         | Qin prophage; putative zinc-binding protein YnfU                                                               | P0DSF4        |
| grcA | 1.494               | 127        | stress-induced alternate pyruvate formate-lyase subunit (yfiD; autonomous glycyl radical cofactor protein)     | P68066        |
| ydfK | 1.486               | 77         | Qin prophage; cold shock protein YdfK                                                                          | P76154        |
| dmlA | 1.481               | 361        | D-malate/3-isopropylmalate dehydrogenase (decarboxylating) (ttuC; yeaU)                                        | P76251        |
| puuA | 1.473               | 472        | glutamate-putrescine ligase (ycjK)                                                                             | P78061        |
| ynaM | 1.443               | 37         | Rac prophage; protein YnaM                                                                                     | P0DPO4        |
| cspF | 1.431               | 70         | Qin prophage; cold shock-like protein CspF                                                                     | P0A976        |
| narH | 1.418               | 521        | nitrate reductase A subunit $\beta$ (chlC)                                                                     | P11349        |
| narG | 1.413               | 1247       | nitrate reductase A subunit $\alpha$ (chlC; narC)                                                              | P09152        |
| NA   | 1.373               |            |                                                                                                                |               |
| ymcF | 1.365               | 62         | protein YmcF: CP4-6 Prophage                                                                                   | P0DPC9        |
| pmrR | 1.358               | 29         | small regulatory membrane protein PmrR                                                                         | G3MTW7        |
| evgS | 1.356               | 1197       | sensor histidine kinase EvgS                                                                                   | P30855        |
| NA   | 1.324               |            |                                                                                                                |               |
| ydfK | 1.306               | 77         | Qin prophage; cold shock protein YdfK                                                                          | P76154        |
| cspG | 1.289               | 70         | cold shock protein CspG (Qin Prophage)                                                                         | P0A978        |

|      |       |      |                                                                                                                                                        |        |
|------|-------|------|--------------------------------------------------------------------------------------------------------------------------------------------------------|--------|
| flgE | 1.272 | 409  | flagellar hook protein FlgE (flaK)                                                                                                                     | P75937 |
| leuD | 1.269 | 201  | 3-isopropylmalate dehydratase subunit LeuD (3-isopropylmalate dehydratase, small subunit)                                                              | P30126 |
| ynjI | 1.262 | 346  | DUF1266 domain-containing protein YnjI                                                                                                                 | P76228 |
| rhIE | 1.251 | 454  | ATP-dependent RNA helicase RhIE                                                                                                                        | P25888 |
| rzpQ | 1.247 | 165  | Qin prophage; DUF2514 domain-containing protein RzpQ (ydfP)                                                                                            | P76158 |
| narI | 1.240 | 225  | nitrate reductase A subunit $\gamma$ (chII)                                                                                                            | P11350 |
| leuA | 1.235 | 523  | 2-isopropylmalate synthase                                                                                                                             | P09151 |
| NA   | 1.227 |      |                                                                                                                                                        |        |
| yjcB | 1.217 | 93   | uncharacterized protein YjcB                                                                                                                           | P32700 |
| tdcE | 1.211 | 764  | • 2-oxobutanoate formate-lyase/pyruvate formate-lyase 4 (yhaS; 2-ketobutyrate formate-lyase/pyruvate formate-lyase 4)                                  | P42632 |
| fepC | 1.205 | 271  | ferric enterobactin ABC transporter ATP binding subunit                                                                                                | P23878 |
| NA   | 1.205 |      |                                                                                                                                                        |        |
| fimC | 1.188 | 241  | type 1 fimbriae periplasmic chaperone (pilB)                                                                                                           | P31697 |
| tdcD | 1.187 | 402  | • propionate kinase (yhaA)                                                                                                                             | P11868 |
| fliG | 1.184 | 331  | flagellar motor switch protein FliG (flaAII.2; flaBII)                                                                                                 | P0ABZ1 |
| flgD | 1.180 | 231  | flagellar motor switch protein FliG (flaAII.2; flaBII)                                                                                                 | P75936 |
| narJ | 1.176 | 236  | nitrate reductase 1 molybdenum cofactor assembly chaperone (molybdenum cofactor assembly chaperone subunit ( $\delta$ subunit) of nitrate reductase 1) | P0AF26 |
| btsT | 1.171 | 716  | • pyruvate:H <sup>+</sup> symporter (yjiY)                                                                                                             | P39396 |
| fliP | 1.146 | 245  | flagellar biosynthesis protein FliP (flaR)                                                                                                             | P0AC05 |
| ynfT | 1.135 | 37   | Qin prophage; protein YnfT                                                                                                                             | P0DPO8 |
| fliI | 1.135 | 457  | flagellar export ATPase FliI (fla; flaAIII; flaC)                                                                                                      | P52612 |
| flgF | 1.124 | 251  | flagellar basal-body rod protein FlgF (flaX)                                                                                                           | P75938 |
| cpxP | 1.119 | 166  | periplasmic protein involved in stress resistance (yiiO; b3913)                                                                                        | P0AE85 |
| cspH | 1.111 | 74   | CspA family protein CspH (cspK)                                                                                                                        | P0A968 |
| fliH | 1.092 | 228  | flagellar biosynthesis protein FliH (flaAII.3; flaBIII)                                                                                                | P31068 |
| proW | 1.092 | 354  | glycine betaine ABC transporter membrane subunit ProW (osrA; proU)                                                                                     | P14176 |
| flgC | 1.077 | 134  | flagellar basal-body rod protein FlgC (flaW)                                                                                                           | P0ABX2 |
| flgB | 1.069 | 138  | flagellar basal-body rod protein FlgB (flbA)                                                                                                           | P0ABW9 |
| flgG | 1.069 | 260  | flagellar basal-body rod protein FlgG (flaL)                                                                                                           | P0ABX5 |
| cspE | 1.058 | 69   | transcription antiterminator and regulator of RNA stability CspE (gicA; msmC)                                                                          | P0A972 |
| bssS | 1.057 | 84   | regulator of biofilm formation (yceP)                                                                                                                  | P0AB33 |
| fliM | 1.053 | 334  | flagellar motor switch protein FliM (flaQ; fla; flaQII; flaAII; flaA; cheC2)                                                                           | P06974 |
| yiaG | 1.050 | 96   | putative DNA-binding transcriptional regulator YiaG                                                                                                    | P0A9V5 |
| tomB | 1.048 | 124  | Hha toxicity modulator TomB (ybaJ)                                                                                                                     | P0AAR0 |
| fdnG | 1.022 | 1015 | formate dehydrogenase N subunit $\alpha$                                                                                                               | P24183 |
| tdcF | 1.018 | 129  | • predicted enamine/imine deaminase (yhaR)                                                                                                             | P0AGL2 |
| puuP | 1.017 | 461  | putrescine:H <sup>+</sup> symporter PuuP (ycjJ)                                                                                                        | P76037 |

|      |       |     |                                                  |        |
|------|-------|-----|--------------------------------------------------|--------|
| yohK | 1.014 | 231 | putative 3-hydroxypropanoate export protein YohK | P0AD19 |
| NA   | 1.010 |     |                                                  |        |
| yfiM | 1.009 | 107 | DUF2279 domain-containing protein YfiM           | P46126 |
| narK | 1.004 | 463 | nitrate:nitrite antiporter NarK                  | P10903 |

|    |                            |
|----|----------------------------|
|    | small protein (<100 a.a.)  |
|    | predicted chaperon         |
|    | prophage                   |
|    | nitrate/nitrite metabolism |
|    | flageller                  |
|    | fimbrial                   |
| •  | carbohydrate utilization   |
| NA | Not Available              |

**Table S4 List of genes significantly upregulated in shaking culture (S>T)**

Genes with  $|\logFC| > 1$  and a significantly low FDR (FDR < 0.05) were annotated. Genes identified as characteristic of the culture are highlighted or marked (see Table 1).

| gene         | logFC  | size (a.a) | Description: <i>Escherichia coli</i> K-12 substr. MG1655 reference genome (EcoCyc)                       | UniProt Entry |
|--------------|--------|------------|----------------------------------------------------------------------------------------------------------|---------------|
| <i>lacZ</i>  | -2.762 | 1024       | • $\beta$ -galactosidase ( $\beta$ -D-galactoside galactohydrolase; $\beta$ -D-galactosidase; lactase)   | P00722        |
| <i>alsB</i>  | -2.620 | 311        | • D-allose ABC transporter periplasmic binding protein ( <i>yjcX</i> ; ALBP; allose binding protein)     | P39265        |
| <i>alsA</i>  | -2.521 | 510        | • D-allose ABC transporter ATP binding subunit ( <i>yjcW</i> )                                           | P32721        |
| <i>lacY</i>  | -2.370 | 417        | • lactose permease (lactose:H <sup>+</sup> symporter; lac permease; galactoside:proton symporter)        | P02920        |
| <i>yfdN</i>  | -2.309 | 164        | CPS-53 (KpLE1) prophage; uncharacterized protein YfdN ( <i>zyyA</i> )                                    | P76510        |
| <i>alsE</i>  | -1.994 | 231        | • D-allulose-6-phosphate 3-epimerase ( <i>yjcU</i> )                                                     | P32719        |
| <i>alsC</i>  | -1.958 | 326        | • D-allose ABC transporter membrane subunit ( <i>yjcV</i> )                                              | P32720        |
| NA           | -1.956 |            |                                                                                                          |               |
| <i>alsR</i>  | -1.945 | 296        | • DNA-binding transcriptional repressor AlsR ( <i>yjcY</i> ; <i>rpiR</i> )                               | P0ACS7        |
| <i>lacA</i>  | -1.932 | 203        | • galactoside O-acetyltransferase (thiogalactoside acetyltransferase)                                    | P07464        |
| <i>yhfY</i>  | -1.814 | 120        | PRD domain-containing protein YhfY                                                                       | P45551        |
| NA           | -1.748 |            |                                                                                                          |               |
| NA           | -1.704 |            |                                                                                                          |               |
| <i>xapA</i>  | -1.669 | 277        | • xanthosine phosphorylase. xanthosine phosphorylase ( <i>pndA</i> ; purine nucleoside phosphorylase II) | P45563        |
| <i>tdcR</i>  | -1.646 | 72         | • DNA-binding transcriptional activator TdcR (threonine dehydratase operon activator protein)            | P11866        |
| <i>rbsA</i>  | -1.629 | 501        | • ribose ABC transporter ATP binding subunit ( <i>rbsT</i> ; <i>rbsP</i> )                               | P04983        |
| NA           | -1.575 |            |                                                                                                          |               |
| <i>ymgC</i>  | -1.572 | 82         | protein YmgC (protein involved in biofilm formation)                                                     | P75994        |
| NA           | -1.551 |            |                                                                                                          |               |
| <i>yiaW</i>  | -1.536 | 107        | DUF3302 domain-containing protein YiaW                                                                   | P0ADK4        |
| NA           | -1.521 |            |                                                                                                          |               |
| <i>alsK</i>  | -1.516 | 309        | • D-allose kinase ( <i>yjcT</i> )                                                                        | P32718        |
| <i>rpiB</i>  | -1.486 | 149        | • allose-6-phosphate isomerase / ribose-5-phosphate isomerase B ( <i>yjcA</i> ; <i>alsI</i> )            | P37351        |
| <i>rutC</i>  | -1.467 | 128        | 3-aminoacrylate deaminase ( <i>ycdK</i> ; putative aminoacrylate peracid reductase RutC)                 | P0AFQ5        |
| <i>yfdM</i>  | -1.438 | 91         | CPS-53 (KpLE1) prophage; putative methyltransferase YfdM ( <i>zyyB</i> )                                 | P76509        |
| <i>espX5</i> | -1.433 | 430        | pentapeptide repeat-containing protein YjcF (RS21705; YjcF)                                              | A0AAW9WZX7    |
| <i>uacT</i>  | -1.423 | 482        | transporter urate:H <sup>+</sup> symporter ( <i>ygfU</i> )                                               | Q46821        |
| <i>adiY</i>  | -1.399 | 253        | DNA-binding transcriptional activator AdiY                                                               | P33234        |
| <i>yadL</i>  | -1.386 | 201        | putative fimbrial protein YadL                                                                           | P37017        |
| NA           | -1.385 |            |                                                                                                          |               |

|             |        |      |                                                                                                                                                                                                                                          |        |
|-------------|--------|------|------------------------------------------------------------------------------------------------------------------------------------------------------------------------------------------------------------------------------------------|--------|
| NA          | -1.377 |      |                                                                                                                                                                                                                                          |        |
| <i>ssuC</i> | -1.369 | 263  | aliphatic sulfonate ABC transporter membrane subunit (ycbM)                                                                                                                                                                              | P75851 |
| <i>lldP</i> | -1.362 | 551  | • lactate/glycolate:H <sup>+</sup> symporter LldP (lct; lctP)                                                                                                                                                                            | P33231 |
| <i>yfbM</i> | -1.343 | 167  | DUF1877 domain-containing protein YfbM                                                                                                                                                                                                   | P76483 |
| <i>csgB</i> | -1.330 | 151  | curlin, minor subunit                                                                                                                                                                                                                    | P0ABK7 |
| NA          | -1.326 |      |                                                                                                                                                                                                                                          |        |
| <i>yadK</i> | -1.315 | 198  | putative fimbrial protein YadK                                                                                                                                                                                                           | P37016 |
| NA          | -1.266 |      |                                                                                                                                                                                                                                          |        |
| <i>ybhI</i> | -1.258 | 477  | putative tricarboxylate transporter                                                                                                                                                                                                      | P75763 |
| <i>cysP</i> | -1.246 | 338  | thiosulfate/sulfate ABC transporter periplasmic binding protein CysP (TSBP)                                                                                                                                                              | P16700 |
| <i>glaH</i> | -1.242 | 325  | glutarate dioxygenase GlaH (csi-12; ygaT; csiD)                                                                                                                                                                                          | P76621 |
| <i>yiaL</i> | -1.234 | 155  | DUF386 domain-containing protein YiaL                                                                                                                                                                                                    | P37673 |
| NA          | -1.234 |      |                                                                                                                                                                                                                                          |        |
| <i>cynS</i> | -1.226 | 156  | cyanase (cnt; cyaN)                                                                                                                                                                                                                      | P00816 |
| <i>fadB</i> | -1.221 | 729  | • multifunctional fatty acid oxidation complex subunit alpha (oldB; multifunctional enoyl-CoA hydratase, 3-hydroxyacyl-CoA epimerase, Δ <sup>3</sup> -cis- Δ <sup>2</sup> -trans-enoyl-CoA isomerase, L-3-hydroxyacyl-CoA dehydrogenase) | P21177 |
| <i>uhpT</i> | -1.220 | 463  | • hexose-6-phosphate:phosphate antiporter (UhpT-hexose phosphate MFS transporter)                                                                                                                                                        | P0AGC0 |
| <i>fixX</i> | -1.207 | 95   | putative ferredoxin FixX (yaaT; putative ferredoxin possibly involved in anaerobic carnitine metabolism)                                                                                                                                 | P68646 |
| <i>yjbS</i> | -1.205 | 67   | uncharacterized protein YjbS                                                                                                                                                                                                             | P58036 |
| <i>glpA</i> | -1.200 | 542  | • anaerobic glycerol-3-phosphate dehydrogenase subunit A                                                                                                                                                                                 | P0A9C0 |
| NA          | -1.181 |      |                                                                                                                                                                                                                                          |        |
| <i>yihU</i> | -1.181 | 298  | 3-sulfolactaldehyde reductase (squU)                                                                                                                                                                                                     | P0A9V8 |
| <i>ygeG</i> | -1.175 | 163  | TPR repeat-containing putative chaperone YgeG                                                                                                                                                                                            | Q46787 |
| <i>ybfD</i> | -1.172 | 253  | H repeat-associated putative transposase YbfD                                                                                                                                                                                            | P28916 |
| <i>btsS</i> | -1.159 | 561  | • high-affinity pyruvate receptor (yehU)                                                                                                                                                                                                 | P0AD14 |
| <i>yiaT</i> | -1.159 | 246  | outer membrane protein YiaT                                                                                                                                                                                                              | P37681 |
| <i>ynfO</i> | -1.144 | 77   | Qin prophage; DUF3950 domain-containing protein YnfO                                                                                                                                                                                     | Q2EES0 |
| <i>ymgA</i> | -1.142 | 90   | putative two-component system connector protein YmgA (protein involved in biofilm formation)                                                                                                                                             | P75992 |
| NA          | -1.139 |      |                                                                                                                                                                                                                                          |        |
| <i>cynX</i> | -1.137 | 384  | cyanate transporter (CynX cyanate MFS transporter)                                                                                                                                                                                       | P17583 |
| <i>groL</i> | -1.134 | 548  | chaperonin GroEL (groEL; mopA; cpn60)                                                                                                                                                                                                    | P0A6F5 |
| NA          | -1.133 |      |                                                                                                                                                                                                                                          |        |
| <i>rihB</i> | -1.124 | 313  | • pyrimidine-specific ribonucleoside hydrolase RihB (yeiK; ribonucleoside hydrolase 2 (pyrimidine-specific))                                                                                                                             | P33022 |
| <i>tsuA</i> | -1.119 | 2247 | thiosulfate transporter                                                                                                                                                                                                                  | Q55FT4 |
| <i>hyfC</i> | -1.116 | 315  | hydrogenase 4 component C                                                                                                                                                                                                                | P77858 |

|             |        |     |                                                                                                                                                              |        |
|-------------|--------|-----|--------------------------------------------------------------------------------------------------------------------------------------------------------------|--------|
| <i>dctA</i> | -1.116 | 428 | • C4 dicarboxylate/orotate:H <sup>+</sup> symporter                                                                                                          | P0A830 |
| <i>groS</i> | -1.110 | 97  | cochaperonin GroES (groES; mopB; cpn10)                                                                                                                      | P0A6F9 |
| <i>glpB</i> | -1.107 | 419 | • anaerobic glycerol-3-phosphate dehydrogenase subunit B (psi-51)                                                                                            | P13033 |
| <i>phnD</i> | -1.107 | 338 | phosphonate/phosphate ABC transporter periplasmic binding protein (phn; psiD; cryptic phosphonate ABC transporter periplasmic binding protein)               | P16682 |
| <i>tnaB</i> | -1.095 | 415 | tryptophan:H <sup>+</sup> symporter TnaB (tnaP; trpP; TnaB tryptophan ArAAP transporter)                                                                     | P23173 |
| <i>flhD</i> | -1.087 | 116 | DNA-binding transcriptional dual regulator FlhD (flbB)                                                                                                       | P0A8S9 |
| NA          | -1.083 |     |                                                                                                                                                              |        |
| <i>ydiN</i> | -1.075 | 421 | putative transporter YdiN                                                                                                                                    | P76198 |
| <i>ydiF</i> | -1.075 | 531 | acetate-CoA transferase YdiF (fused predicted acetyl-CoA:acetoacetyl-CoA transferase: $\alpha$ subunit/ $\beta$ subunit; lactate-CoA transferase)            | P37766 |
| <i>fixA</i> | -1.075 | 256 | putative electron transfer flavoprotein FixA (yaaQ; putative electron transfer flavoprotein subunit, ETFP adenine nucleotide-binding domain): Qin prophage** | P60566 |
| <i>treC</i> | -1.070 | 551 | • trehalose-6-phosphate hydrolase (treE; olgH)                                                                                                               | P28904 |
| <i>allW</i> | -1.069 | 484 | • allantoin transporter (allP; glxB2; ybbW)                                                                                                                  | P75712 |
| <i>caiD</i> | -1.064 | 261 | • crotonobetainyl-CoA hydratase (yaaL)                                                                                                                       | P31551 |
| <i>yhfZ</i> | -1.062 | 301 | putative DNA-binding transcriptional regulator YhfZ                                                                                                          | P45552 |
| <i>yzgL</i> | -1.062 | 93  | putative uncharacterized protein YzgL                                                                                                                        | P76692 |
| <i>btsR</i> | -1.045 | 239 | • DNA-binding transcriptional dual regulator BtsR (yehT)                                                                                                     | P0AFT5 |
| NA          | -1.045 |     |                                                                                                                                                              |        |
| <i>rutB</i> | -1.043 | 230 | ureidoacrylate amidohydrolase (ycdL; peroxyureidoacrylate amidohydrolase)                                                                                    | P75897 |
| <i>yadN</i> | -1.041 | 194 | putative fimbrial protein YadN                                                                                                                               | P37050 |
| <i>bgIH</i> | -1.038 | 538 | • carbohydrate-specific outer membrane porin (yieC)                                                                                                          | P26218 |
| <i>slp</i>  | -1.038 | 188 | starvation lipoprotein                                                                                                                                       | P37194 |
| <i>yggP</i> | -1.037 | 433 | putative zinc-binding dehydrogenase YggP (b2931; b2932)                                                                                                      | P52048 |
| <i>lhgO</i> | -1.037 | 422 | L-2-hydroxyglutarate dehydrogenase (ygaF; lhgO)                                                                                                              | P37339 |
| <i>ytiD</i> | -1.019 | 47  | Protein YtiD                                                                                                                                                 | P0DPC5 |
| <i>lldR</i> | -1.018 | 258 | • DNA-binding transcriptional dual regulator LldR (lct; lctR)                                                                                                | P0ACL7 |
| <i>cmtA</i> | -1.014 | 462 | • mannitol-specific PTS enzyme IICB component CmtA (EIICB <sup>Cmt</sup> ; Enzyme IICB <sup>Cmt</sup> )                                                      | P69826 |
| <i>yjdP</i> | -1.012 | 109 | protein YjdP                                                                                                                                                 | Q6BEX5 |
| <i>nohA</i> | -1.011 | 189 | putative prophage DNA-packaging protein NohA (nohQ)                                                                                                          | P31061 |
| <i>araB</i> | -1.010 | 566 | • Ribulokinase                                                                                                                                               | P08204 |
| <i>setC</i> | -1.005 | 394 | putative arabinose exporter (yicK; YicK MFS Transporter)                                                                                                     | P31436 |
| <i>ariR</i> | -1.003 | 88  | putative two-component system connector protein AriR (ymgB; regulator of acid resistance, influenced by indole)                                              | P75993 |

|  |                           |
|--|---------------------------|
|  | small protein (<100 a.a.) |
|  | predicted chaperon        |
|  | prophage                  |

-  nitrate/nitrite metabolism
-  flageller
-  fimbrial
-  carbohydrate utilization
- NA Not Available

**Table S5 Turbidity (OD<sub>600</sub>) of cultures collected for the transcriptome analysis**

Cell densities were measured after 3 h of incubation. Values represent the mean OD<sub>600</sub> of pooled replicates (n=3 for each group, S01–S03 and T01–T03). Statistical analysis (Student's t-test) showed no significant difference in growth between shaking and static conditions, ensuring that transcriptomic differences are not confounded by differences in growth phase.

| Sample | OD <sub>600</sub> |
|--------|-------------------|
| S01    | 0.8263            |
| S02    | 0.8816            |
| S03    | 0.8445            |
| T01    | 0.9247            |
| T02    | 0.8154            |
| T03    | 0.7732            |

**Table S6 Results of gene ontology (GO) enrichment analysis of differentially expressed genes (DEGs)**  
 Categories included Biological Process (1), Molecular Function (2), and Cellular Component (3). The top 10 results, sorted in ascending order of P-value, are shown. For combinations with 500 or more DEGs, the top 500 genes (ranked by the lowest FDR) were used for the analysis.

**(a) Top 10 of GO enrichment analysis (Biological Process categori, S vs T)**

| GO. ID     | Term                                            | Annotated* | Significant** | Expected*** | P value**** |
|------------|-------------------------------------------------|------------|---------------|-------------|-------------|
| GO:0006082 | organic acid metabolic process                  | 205        | 44            | 26.41       | 0.00016     |
| GO:0043436 | oxoacid metabolic process                       | 201        | 43            | 25.9        | 0.00021     |
| GO:0019752 | carboxylic acid metabolic process               | 196        | 42            | 25.25       | 0.00025     |
| GO:0042953 | lipoprotein transport                           | 4          | 4             | 0.52        | 0.00027     |
| GO:0044872 | lipoprotein localization                        | 4          | 4             | 0.52        | 0.00027     |
| GO:0009072 | aromatic amino acid metabolic process           | 13         | 7             | 1.67        | 0.00046     |
| GO:0009073 | aromatic amino acid family biosynthetic process | 10         | 6             | 1.29        | 0.00057     |
| GO:0016053 | organic acid biosynthetic process               | 95         | 23            | 12.24       | 0.00135     |
| GO:0046394 | carboxylic acid biosynthetic process            | 95         | 23            | 12.24       | 0.00135     |
| GO:0006551 | leucine metabolic process                       | 3          | 3             | 0.39        | 0.00211     |

**(b) Top 10 of GO enrichment analysis (Molecular Function categori, S vs T)**

| GO. ID | Term | Annotated* | Significant** | Expected*** | P value**** |
|--------|------|------------|---------------|-------------|-------------|
|--------|------|------------|---------------|-------------|-------------|

|            |                                                                                                       |    |    |      |          |
|------------|-------------------------------------------------------------------------------------------------------|----|----|------|----------|
| GO:0016901 | oxidoreductase activity, acting on the CH-OH group of donors, quinone or similar compound as acceptor | 6  | 6  | 0.78 | 4.70E-06 |
| GO:0004368 | glycerol-3-phosphate dehydrogenase (quinone) activity                                                 | 4  | 4  | 0.52 | 0.00029  |
| GO:0008028 | monocarboxylic acid transmembrane transporter activity                                                | 5  | 4  | 0.65 | 0.00128  |
| GO:0016614 | oxidoreductase activity, acting on CH-OH group of donors                                              | 53 | 15 | 6.92 | 0.0022   |
| GO:0001072 | transcription antitermination factor activity, RNA binding                                            | 3  | 3  | 0.39 | 0.00221  |
| GO:0003861 | 3-isopropylmalate dehydratase activity                                                                | 2  | 2  | 0.26 | 0.01701  |
| GO:0004106 | chorismate mutase activity                                                                            | 2  | 2  | 0.26 | 0.01701  |
| GO:0004834 | tryptophan synthase activity                                                                          | 2  | 2  | 0.26 | 0.01701  |
| GO:0016836 | hydro-lyase activity                                                                                  | 33 | 9  | 4.31 | 0.02144  |
| GO:0004672 | protein kinase activity                                                                               | 23 | 7  | 3    | 0.02288  |

**(c) Top 10 of GO enrichment analysis (Cellular Component category, S vs T)**

| GO. ID      | Term                   | Annotated* | Significant** | Expected*** | P value**** |
|-------------|------------------------|------------|---------------|-------------|-------------|
| GO: 1990204 | oxidoreductase complex | 19         | 8             | 2.26        | 0.0007      |

|             |                                            |    |    |       |        |
|-------------|--------------------------------------------|----|----|-------|--------|
| GO: 1902494 | catalytic complex                          | 57 | 15 | 6.78  | 0.0012 |
| GO:0009331  | glycerol-3-phosphate dehydrogenase complex | 3  | 3  | 0.36  | 0.0016 |
| GO:0009288  | bacterial-type flagellum                   | 16 | 6  | 1.9   | 0.007  |
| GO:0009316  | 3-isopropylmalate dehydratase complex      | 2  | 2  | 0.24  | 0.014  |
| GO:0045254  | pyruvate dehydrogenase complex             | 2  | 2  | 0.24  | 0.014  |
| GO:0042995  | cell projection                            | 36 | 8  | 4.28  | 0.0516 |
| GO:0009425  | bacterial-type flagellum basal body        | 8  | 3  | 0.95  | 0.0582 |
| GO:0005737  | cytoplasm                                  | 92 | 15 | 10.94 | 0.1088 |
| GO:0009325  | nitrate reductase complex                  | 5  | 2  | 0.59  | 0.11   |

\*Annotated: Number of genes annotated to a specific GO term among all of the genes \*\*Number of genes associated with a GO term among the DEGs.

\*\*\*Expected: The number of genes predicted to occur in the DEG list by chance

\*\*\*\*P-value calculated by Fisher's exact test
